# Supplementary material for: Particles emitted from smouldering peat: size-resolved composition and emission factors
Source: Royal Society of Chemistry journal article supplement (doi:10.1039/d4ea00124a), 2025-01-01
Supplement: d4ea00124a1.zip [file d4ea00124a1.zip]

## Sheet: SIWafer
	SI WAFER RAMAN SPECTRA DATA
	Raman shift cm-1	Count		x0 = 2311.53711
				dx = -1.05902 (cm-1)
	2311.54	57.0844
	2310.48	45.9302
	2309.42	27.9778
	2308.36	65.4702
	2307.3	35.2767
	2306.24	31.1428
	2305.18	49.9915
	2304.12	57.6329
	2303.06	42.1495
	2302.01	31.9836
	2300.95	15.8165
	2299.89	51.175
	2298.83	43.5582
	2297.77	40.0059
	2296.71	34.3201
	2295.65	39.4774
	2294.59	47.7037
	2293.53	51.6672
	2292.47	13.3874
	2291.42	59.2523
	2290.36	30.7461
	2289.3	22.8734
	2288.24	17.0473
	2287.18	35.0949
	2286.12	12.6451
	2285.06	37.0111
	2284	37.2206
	2282.94	4.03937
	2281.88	31.0656
	2280.83	20.453
	2279.77	31.118
	2278.71	15.9244
	2277.65	32.1881
	2276.59	43.9999
	2275.53	21.9612
	2274.47	24.61
	2273.41	15.6032
	2272.35	35.2987
	2271.29	45.3942
	2270.24	35.3715
	2269.18	10.2421
	2268.12	34.991
	2267.06	10.7956
	2266	40.0498
	2264.94	26.9975
	2263.88	32.1452
	2262.82	27.4143
	2261.76	27.9404
	2260.7	32.1947
	2259.65	17.7408
	2258.59	36.4465
	2257.53	28.5919
	2256.47	29.8771
	2255.41	35.7833
	2254.35	47.4627
	2253.29	19.8685
	2252.23	5.24314
	2251.17	29.5531
	2250.11	26.0773
	2249.05	17.5539
	2248	34.4379
	2246.94	33.3421
	2245.88	17.9764
	2244.82	12.8189
	2243.76	29.3209
	2242.7	23.0984
	2241.64	26.7865
	2240.58	12.809
	2239.52	12.8065
	2238.46	10.1443
	2237.41	19.4563
	2236.35	38.3972
	2235.29	32.2529
	2234.23	31.6403
	2233.17	19.5321
	2232.11	-6.41317
	2231.05	44.6704
	2229.99	33.0124
	2228.93	21.9851
	2227.87	41.8326
	2226.82	56.8314
	2225.76	31.853
	2224.7	41.9564
	2223.64	31.8947
	2222.58	36.6902
	2221.52	42.5663
	2220.46	39.5379
	2219.4	29.7417
	2218.34	7.01283
	2217.28	48.3374
	2216.23	33.5489
	2215.17	36.2457
	2214.11	28.5186
	2213.05	26.0968
	2211.99	5.06647
	2210.93	23.6686
	2209.87	24.3385
	2208.81	28.213
	2207.75	26.5581
	2206.69	24.9311
	2205.64	34.318
	2204.58	-17.4791
	2203.52	18.0143
	2202.46	23.5851
	2201.4	11.301
	2200.34	31.2587
	2199.28	31.2893
	2198.22	2.23105
	2197.16	-1.51573
	2196.1	8.72794
	2195.04	17.3937
	2193.99	19.2193
	2192.93	23.8156
	2191.87	38.622
	2190.81	11.8469
	2189.75	29.8463
	2188.69	3.33884
	2187.63	29.4977
	2186.57	3.70267
	2185.51	20.0467
	2184.45	34.4085
	2183.4	21.6482
	2182.34	4.10651
	2181.28	29.3706
	2180.22	34.3819
	2179.16	34.2438
	2178.1	29.129
	2177.04	20.9819
	2175.98	20.2535
	2174.92	11.8982
	2173.86	-1.91563
	2172.81	7.89926
	2171.75	33.7028
	2170.69	38.7456
	2169.63	19.0011
	2168.57	7.37445
	2167.51	9.85951
	2166.45	16.991
	2165.39	8.77725
	2164.33	48.6255
	2163.27	21.1537
	2162.22	24.0047
	2161.16	10.5439
	2160.1	9.29091
	2159.04	-5.68435
	2157.98	32.9601
	2156.92	41.6802
	2155.86	8.78758
	2154.8	-10.8129
	2153.74	33.9153
	2152.68	32.6743
	2151.63	30.2453
	2150.57	25.2953
	2149.51	13.5872
	2148.45	27.9597
	2147.39	17.6447
	2146.33	8.14589
	2145.27	12.5318
	2144.21	12.1746
	2143.15	8.39082
	2142.09	33.1783
	2141.03	31.4155
	2139.98	13.7374
	2138.92	7.69608
	2137.86	12.2349
	2136.8	15.4078
	2135.74	36.3475
	2134.68	24.987
	2133.62	11.5291
	2132.56	19.7181
	2131.5	16.3193
	2130.44	39.8387
	2129.39	40.264
	2128.33	25.2143
	2127.27	29.2429
	2126.21	20.0702
	2125.15	19.0013
	2124.09	24.6663
	2123.03	40.8642
	2121.97	21.5627
	2120.91	31.5944
	2119.85	29.4172
	2118.8	35.4772
	2117.74	38.8054
	2116.68	37.8541
	2115.62	36.2265
	2114.56	32.9815
	2113.5	1.475
	2112.44	18.7936
	2111.38	10.1235
	2110.32	27.0241
	2109.26	20.9461
	2108.21	28.898
	2107.15	31.3393
	2106.09	16.226
	2105.03	27.3343
	2103.97	44.6414
	2102.91	19.9853
	2101.85	32.0268
	2100.79	35.0386
	2099.73	34.8428
	2098.67	17.9613
	2097.62	13.8092
	2096.56	23.1917
	2095.5	29.3406
	2094.44	1.87471
	2093.38	37.1255
	2092.32	2.9866
	2091.26	12.4644
	2090.2	10.0548
	2089.14	7.75119
	2088.08	39.4082
	2087.02	19.1985
	2085.97	9.37667
	2084.91	17.8964
	2083.85	24.8953
	2082.79	30.3273
	2081.73	33.3465
	2080.67	-0.1912
	2079.61	16.0564
	2078.55	18.4838
	2077.49	12.8951
	2076.43	36.1936
	2075.38	21.4353
	2074.32	10.1919
	2073.26	-4.33035
	2072.2	21.0462
	2071.14	34.7732
	2070.08	34.7666
	2069.02	24.2706
	2067.96	0.72465
	2066.9	21.4221
	2065.84	17.648
	2064.79	22.1322
	2063.73	5.09863
	2062.67	12.2954
	2061.61	29.1922
	2060.55	22.6904
	2059.49	25.9267
	2058.43	26.0622
	2057.37	30.649
	2056.31	9.29838
	2055.25	11.5641
	2054.2	28.6498
	2053.14	32.1528
	2052.08	-4.32642
	2051.02	15.5176
	2049.96	47.8563
	2048.9	35.7717
	2047.84	25.746
	2046.78	23.2666
	2045.72	32.8001
	2044.66	16.3029
	2043.61	53.7615
	2042.55	45.9912
	2041.49	41.999
	2040.43	29.6295
	2039.37	13.8025
	2038.31	-4.53054
	2037.25	8.22568
	2036.19	20.9288
	2035.13	28.0164
	2034.07	31.6566
	2033.01	47.191
	2031.96	26.6205
	2030.9	27.0385
	2029.84	4.97107
	2028.78	10.3807
	2027.72	18.2742
	2026.66	10.1166
	2025.6	40.9684
	2024.54	34.7038
	2023.48	26.4223
	2022.42	24.6206
	2021.37	14.9837
	2020.31	14.2073
	2019.25	25.2578
	2018.19	22.8552
	2017.13	36.7698
	2016.07	19.0808
	2015.01	8.87376
	2013.95	-4.5406
	2012.89	4.68122
	2011.83	19.4874
	2010.78	25.9148
	2009.72	13.0421
	2008.66	9.82393
	2007.6	25.1917
	2006.54	1.75942
	2005.48	21.5092
	2004.42	3.08869
	2003.36	44.7977
	2002.3	11.5902
	2001.24	8.74601
	2000.19	33.9164
	1999.13	31.3631
	1998.07	22.7628
	1997.01	5.94827
	1995.95	9.94506
	1994.89	9.7273
	1993.83	29.8759
	1992.77	31.0852
	1991.71	23.4633
	1990.65	23.332
	1989.6	20.2188
	1988.54	16.1106
	1987.48	8.03304
	1986.42	15.2869
	1985.36	8.45334
	1984.3	6.00689
	1983.24	20.4188
	1982.18	18.5784
	1981.12	29.3445
	1980.06	23.2688
	1979	61.7428
	1977.95	15.5011
	1976.89	9.8326
	1975.83	11.9232
	1974.77	-20.3586
	1973.71	17.8261
	1972.65	24.9825
	1971.59	17.4511
	1970.53	53.9677
	1969.47	14.3405
	1968.41	26.3934
	1967.36	11.09
	1966.3	13.1264
	1965.24	19.6966
	1964.18	38.9844
	1963.12	24.2231
	1962.06	2.4356
	1961	18.3757
	1959.94	28.0098
	1958.88	23.3452
	1957.82	29.5023
	1956.77	18.67
	1955.71	8.21647
	1954.65	26.3351
	1953.59	44.7776
	1952.53	45.1604
	1951.47	27.508
	1950.41	27.5009
	1949.35	3.82452
	1948.29	33.9275
	1947.23	26.6699
	1946.18	24.2873
	1945.12	8.68004
	1944.06	43.9946
	1943	-22.4283
	1941.94	19.3227
	1940.88	-13.8394
	1939.82	10.9805
	1938.76	33.3947
	1937.7	52.5355
	1936.64	45.3929
	1935.59	37.9883
	1934.53	16.6669
	1933.47	5.81682
	1932.41	37.6401
	1931.35	12.7904
	1930.29	2.38033
	1929.23	18.5889
	1928.17	14.4127
	1927.11	12.4066
	1926.05	7.25728
	1924.99	7.14357
	1923.94	18.9888
	1922.88	21.1455
	1921.82	33.8556
	1920.76	33.8493
	1919.7	25.9074
	1918.64	20.7134
	1917.58	23.1842
	1916.52	30.1346
	1915.46	30.7197
	1914.4	33.7944
	1913.35	21.2824
	1912.29	-0.91984
	1911.23	22.7776
	1910.17	26.5009
	1909.11	42.8571
	1908.05	28.9748
	1906.99	-5.56042
	1905.93	12.2951
	1904.87	27.2762
	1903.81	9.75506
	1902.76	9.41124
	1901.7	25.2594
	1900.64	-7.72671
	1899.58	13.646
	1898.52	19.2065
	1897.46	26.5194
	1896.4	30.4199
	1895.34	-1.15987
	1894.28	24.3841
	1893.22	26.4039
	1892.17	0.75531
	1891.11	5.43055
	1890.05	-4.83751
	1888.99	10.3872
	1887.93	11.8597
	1886.87	2.36273
	1885.81	15.0979
	1884.75	21.4187
	1883.69	8.4117
	1882.63	21.7841
	1881.57	18.5714
	1880.52	2.1726
	1879.46	17.1412
	1878.4	12.8305
	1877.34	19.3012
	1876.28	-3.67514
	1875.22	-1.26956
	1874.16	10.9637
	1873.1	31.3964
	1872.04	20.5423
	1870.98	18.105
	1869.93	14.5674
	1868.87	4.01841
	1867.81	-3.61666
	1866.75	10.8958
	1865.69	40.0706
	1864.63	46.1385
	1863.57	29.1334
	1862.51	8.12815
	1861.45	5.84629
	1860.39	27.4166
	1859.34	39.7056
	1858.28	53.852
	1857.22	51.6861
	1856.16	34.7385
	1855.1	27.1238
	1854.04	8.84962
	1852.98	20.9639
	1851.92	32.6926
	1850.86	20.0957
	1849.8	4.15856
	1848.75	10.3333
	1847.69	23.0686
	1846.63	26.251
	1845.57	-4.3677
	1844.51	14.8674
	1843.45	10.9016
	1842.39	24.0194
	1841.33	26.714
	1840.27	-12.1695
	1839.21	23.2213
	1838.16	9.7787
	1837.1	8.74061
	1836.04	31.6053
	1834.98	25.5791
	1833.92	19.7154
	1832.86	23.1858
	1831.8	15.4465
	1830.74	7.95741
	1829.68	15.6405
	1828.62	-6.92831
	1827.56	12.1072
	1826.51	33.8541
	1825.45	2.75153
	1824.39	2.21257
	1823.33	-6.52934
	1822.27	17.5129
	1821.21	16.7487
	1820.15	0.72317
	1819.09	2.28602
	1818.03	20.7717
	1816.97	5.17225
	1815.92	23.3301
	1814.86	28.4056
	1813.8	12.0219
	1812.74	26.0201
	1811.68	21.3528
	1810.62	7.10319
	1809.56	4.8672
	1808.5	19.057
	1807.44	26.2748
	1806.38	38.116
	1805.33	47.1089
	1804.27	35.0109
	1803.21	15.9793
	1802.15	-2.04742
	1801.09	7.95742
	1800.03	29.916
	1798.97	9.66787
	1797.91	15.4667
	1796.85	41.0311
	1795.79	9.34505
	1794.74	7.7028
	1793.68	18.6706
	1792.62	13.9292
	1791.56	9.45446
	1790.5	9.05057
	1789.44	2.76727
	1788.38	10.1274
	1787.32	21.3936
	1786.26	22.2368
	1785.2	2.21687
	1784.15	36.6564
	1783.09	19.1532
	1782.03	23.0495
	1780.97	13.7549
	1779.91	7.07649
	1778.85	8.12173
	1777.79	25.81
	1776.73	22.5834
	1775.67	5.67769
	1774.61	23.5666
	1773.55	23.7896
	1772.5	28.0575
	1771.44	23.6558
	1770.38	25.1453
	1769.32	6.78922
	1768.26	-0.25067
	1767.2	-6.68237
	1766.14	4.7745
	1765.08	6.63451
	1764.02	-9.04046
	1762.96	7.45929
	1761.91	28.1059
	1760.85	21.1339
	1759.79	18.7522
	1758.73	11.74
	1757.67	7.06213
	1756.61	-11.5999
	1755.55	55.4899
	1754.49	28.6919
	1753.43	16.708
	1752.37	9.589
	1751.32	20.7339
	1750.26	16.6161
	1749.2	27.6225
	1748.14	17.0333
	1747.08	9.79814
	1746.02	7.19013
	1744.96	24.42
	1743.9	17.1582
	1742.84	1.42561
	1741.78	8.49417
	1740.73	22.0121
	1739.67	17.1645
	1738.61	8.11665
	1737.55	25.4638
	1736.49	46.3461
	1735.43	27.073
	1734.37	15.4557
	1733.31	6.17702
	1732.25	20.2372
	1731.19	9.92072
	1730.14	20.3137
	1729.08	6.47902
	1728.02	15.3154
	1726.96	42.5197
	1725.9	23.7578
	1724.84	21.7049
	1723.78	35.6675
	1722.72	18.9026
	1721.66	35.5926
	1720.6	46.042
	1719.54	20.1975
	1718.49	28.8884
	1717.43	30.9273
	1716.37	34.2843
	1715.31	18.7678
	1714.25	24.5137
	1713.19	41.5809
	1712.13	34.944
	1711.07	22.2555
	1710.01	13.051
	1708.95	17.533
	1707.9	25.9704
	1706.84	7.04419
	1705.78	21.2943
	1704.72	45.323
	1703.66	30.9293
	1702.6	30.3768
	1701.54	32.7435
	1700.48	16.6069
	1699.42	-2.5128
	1698.36	1.38408
	1697.31	25.2612
	1696.25	17.2399
	1695.19	3.25819
	1694.13	10.9249
	1693.07	32.0873
	1692.01	33.8401
	1690.95	-1.60375
	1689.89	-7.79311
	1688.83	1.74372
	1687.77	24.954
	1686.72	36.949
	1685.66	11.0118
	1684.6	16.4718
	1683.54	34.8265
	1682.48	15.2608
	1681.42	4.46624
	1680.36	9.63778
	1679.3	-4.64136
	1678.24	31.0996
	1677.18	8.516
	1676.13	19.5345
	1675.07	8.68959
	1674.01	29.4605
	1672.95	17.5568
	1671.89	-6.25872
	1670.83	30.0525
	1669.77	14.2167
	1668.71	16.0999
	1667.65	-5.52273
	1666.59	22.8287
	1665.53	12.9778
	1664.48	31.8691
	1663.42	22.7831
	1662.36	22.7337
	1661.3	2.3986
	1660.24	12.3562
	1659.18	5.46577
	1658.12	30.0644
	1657.06	3.93119
	1656	2.18513
	1654.94	0.60759
	1653.89	11.4485
	1652.83	39.1317
	1651.77	29.4079
	1650.71	16.146
	1649.65	6.92698
	1648.59	3.78933
	1647.53	15.3683
	1646.47	26.5058
	1645.41	25.5612
	1644.35	9.25616
	1643.3	-2.63424
	1642.24	10.2229
	1641.18	21.8415
	1640.12	10.4122
	1639.06	5.30285
	1638	15.41
	1636.94	18.9521
	1635.88	31.0388
	1634.82	24.9786
	1633.76	21.2358
	1632.71	37.3285
	1631.65	18.7365
	1630.59	20.971
	1629.53	23.6606
	1628.47	28.4131
	1627.41	9.18909
	1626.35	9.22709
	1625.29	11.461
	1624.23	15.9002
	1623.17	24.663
	1622.12	12.747
	1621.06	7.43744
	1620	14.6949
	1618.94	46.2593
	1617.88	30.8826
	1616.82	23.4664
	1615.76	9.41318
	1614.7	35.4174
	1613.64	52.7918
	1612.58	26.7119
	1611.52	14.2967
	1610.47	22.7928
	1609.41	39.0255
	1608.35	27.4478
	1607.29	13.7372
	1606.23	12.9308
	1605.17	14.9065
	1604.11	16.7608
	1603.05	14.0777
	1601.99	17.8686
	1600.93	-7.45094
	1599.88	-12.4187
	1598.82	-5.10454
	1597.76	7.86303
	1596.7	18.6904
	1595.64	49.9069
	1594.58	45.9949
	1593.52	30.1221
	1592.46	11.8151
	1591.4	18.4894
	1590.34	27.3109
	1589.29	20.8281
	1588.23	-0.55283
	1587.17	22.1045
	1586.11	17.2671
	1585.05	38.5072
	1583.99	19.9372
	1582.93	22.2839
	1581.87	20.1452
	1580.81	2.61774
	1579.75	-0.1069
	1578.7	13.5125
	1577.64	25.7934
	1576.58	37.0495
	1575.52	30.5074
	1574.46	17.131
	1573.4	13.9369
	1572.34	8.63368
	1571.28	-1.27618
	1570.22	-0.89621
	1569.16	17.8095
	1568.11	14.8497
	1567.05	26.4942
	1565.99	28.9344
	1564.93	15.5792
	1563.87	14.8337
	1562.81	24.9875
	1561.75	24.5029
	1560.69	9.1889
	1559.63	9.08132
	1558.57	11.1588
	1557.51	15.33
	1556.46	31.1107
	1555.4	34.0298
	1554.34	34.0235
	1553.28	20.9337
	1552.22	14.3268
	1551.16	22.3205
	1550.1	27.1986
	1549.04	23.372
	1547.98	26.3032
	1546.92	19.7165
	1545.87	14.7748
	1544.81	30.331
	1543.75	33.6144
	1542.69	27.7778
	1541.63	32.6995
	1540.57	30.4762
	1539.51	33.9352
	1538.45	28.782
	1537.39	4.21064
	1536.33	36.2997
	1535.28	7.07102
	1534.22	17.8764
	1533.16	5.3373
	1532.1	14.6426
	1531.04	17.7421
	1529.98	-2.06737
	1528.92	-3.31121
	1527.86	10.8021
	1526.8	20.4021
	1525.74	18.2651
	1524.69	35.8288
	1523.63	24.9399
	1522.57	16.9871
	1521.51	24.1492
	1520.45	22.6923
	1519.39	30.9636
	1518.33	29.4527
	1517.27	13.42
	1516.21	-1.3799
	1515.15	9.42959
	1514.1	12.8419
	1513.04	21.4668
	1511.98	12.1215
	1510.92	29.2433
	1509.86	7.79023
	1508.8	-7.55667
	1507.74	12.3199
	1506.68	2.9233
	1505.62	18.9486
	1504.56	37.6585
	1503.5	11.0211
	1502.45	-0.2931
	1501.39	25.5271
	1500.33	35.577
	1499.27	30.2783
	1498.21	27.5805
	1497.15	20.7429
	1496.09	14.9748
	1495.03	19.1552
	1493.97	39.6497
	1492.91	23.2657
	1491.86	27.5229
	1490.8	27.7691
	1489.74	-10.5106
	1488.68	8.655
	1487.62	-9.87909
	1486.56	-3.28564
	1485.5	7.09429
	1484.44	14.2144
	1483.38	2.586
	1482.32	14.4867
	1481.27	29.4237
	1480.21	11.6348
	1479.15	10.7899
	1478.09	34.1351
	1477.03	30.6408
	1475.97	12.0098
	1474.91	14.8326
	1473.85	16.129
	1472.79	10.2401
	1471.73	8.10715
	1470.68	16.3457
	1469.62	21.7794
	1468.56	11.205
	1467.5	6.95471
	1466.44	18.6206
	1465.38	16.3706
	1464.32	6.91751
	1463.26	17.4391
	1462.2	19.3181
	1461.14	27.4764
	1460.09	30.9595
	1459.03	30.1247
	1457.97	17.1349
	1456.91	6.16278
	1455.85	13.3338
	1454.79	10.1814
	1453.73	17.9509
	1452.67	28.0723
	1451.61	5.03353
	1450.55	27.1191
	1449.49	33.3746
	1448.44	22.874
	1447.38	40.046
	1446.32	44.1272
	1445.26	39.3427
	1444.2	5.9934
	1443.14	32.7847
	1442.08	37.3977
	1441.02	15.8595
	1439.96	7.74177
	1438.9	15.4887
	1437.85	22.0042
	1436.79	27.9855
	1435.73	50.5374
	1434.67	44.6893
	1433.61	25.7932
	1432.55	20.1313
	1431.49	22.2503
	1430.43	28.502
	1429.37	13.081
	1428.31	0.07439
	1427.26	7.99355
	1426.2	17.3575
	1425.14	27.1091
	1424.08	12.8815
	1423.02	0
	1421.96	6.13724
	1420.9	25.6904
	1419.84	32.3185
	1418.78	17.414
	1417.72	37.0066
	1416.67	26.5617
	1415.61	24.3602
	1414.55	2.86143
	1413.49	25.6479
	1412.43	12.5893
	1411.37	22.1733
	1410.31	24.3202
	1409.25	21.1737
	1408.19	21.321
	1407.13	28.5344
	1406.08	29.7026
	1405.02	20.4869
	1403.96	16.6921
	1402.9	26.393
	1401.84	34.7456
	1400.78	34.3992
	1399.72	36.561
	1398.66	15.0138
	1397.6	8.83541
	1396.54	8.82161
	1395.48	27.9232
	1394.43	43.2253
	1393.37	15.5237
	1392.31	8.82208
	1391.25	20.2866
	1390.19	20.5485
	1389.13	11.2978
	1388.07	15.4157
	1387.01	20.5717
	1385.95	7.3211
	1384.89	12.3679
	1383.84	2.00428
	1382.78	15.6711
	1381.72	19.7666
	1380.66	38.1005
	1379.6	30.1728
	1378.54	14.7419
	1377.48	28.3556
	1376.42	25.175
	1375.36	24.8585
	1374.3	22.9548
	1373.25	18.5361
	1372.19	23.8306
	1371.13	27.4356
	1370.07	23.2734
	1369.01	34.41
	1367.95	30.9099
	1366.89	32.8244
	1365.83	28.746
	1364.77	15.058
	1363.71	9.62514
	1362.66	11.9803
	1361.6	24.7452
	1360.54	34.544
	1359.48	29.3127
	1358.42	27.7397
	1357.36	30.147
	1356.3	18.6084
	1355.24	8.4619
	1354.18	3.36135
	1353.12	22.4075
	1352.06	28.3716
	1351.01	20.2721
	1349.95	21.5587
	1348.89	18.4237
	1347.83	17.4859
	1346.77	18.8749
	1345.71	27.0371
	1344.65	11.4557
	1343.59	-5.50636
	1342.53	15.4872
	1341.47	31.713
	1340.42	2.32182
	1339.36	-5.32026
	1338.3	4.99547
	1337.24	21.1136
	1336.18	19.8831
	1335.12	44.2688
	1334.06	11.9001
	1333	9.23597
	1331.94	21.5564
	1330.88	29.4223
	1329.83	29.9097
	1328.77	21.6144
	1327.71	15.4109
	1326.65	20.9373
	1325.59	17.9085
	1324.53	21.8401
	1323.47	23.8388
	1322.41	16.286
	1321.35	25.654
	1320.29	23.5663
	1319.24	20.3452
	1318.18	17.1173
	1317.12	12.0631
	1316.06	11.3226
	1315	17.3159
	1313.94	24.888
	1312.88	30.8402
	1311.82	11.7524
	1310.76	21.651
	1309.7	5.69056
	1308.65	-4.78738
	1307.59	28.1202
	1306.53	22.8359
	1305.47	24.2447
	1304.41	23.6449
	1303.35	12.6386
	1302.29	1.93402
	1301.23	-4.16669
	1300.17	9.49261
	1299.11	39.3243
	1298.05	24.2143
	1297	40.0735
	1295.94	11.4792
	1294.88	-10.2196
	1293.82	11.6978
	1292.76	21.1747
	1291.7	11.5669
	1290.64	9.05423
	1289.58	14.3693
	1288.52	18.7914
	1287.46	32.9779
	1286.41	25.497
	1285.35	21.2028
	1284.29	-2.49988
	1283.23	19.3756
	1282.17	-7.36476
	1281.11	-1.29329
	1280.05	20.413
	1278.99	35.6157
	1277.93	29.3404
	1276.87	14.3572
	1275.82	16.2036
	1274.76	13.9402
	1273.7	19.2509
	1272.64	17.28
	1271.58	42.2725
	1270.52	22.6456
	1269.46	20.3226
	1268.4	7.9508
	1267.34	12.8484
	1266.28	16.8375
	1265.23	14.8937
	1264.17	22.2471
	1263.11	11.6946
	1262.05	9.00719
	1260.99	32.0724
	1259.93	16.42
	1258.87	16.8308
	1257.81	21.9682
	1256.75	15.2392
	1255.69	11.9439
	1254.64	15.9161
	1253.58	7.07551
	1252.52	-2.93195
	1251.46	20.1851
	1250.4	13.169
	1249.34	-2.00689
	1248.28	5.78479
	1247.22	-4.27745
	1246.16	15.8012
	1245.1	12.4486
	1244.04	12.3994
	1242.99	6.19026
	1241.93	5.50712
	1240.87	22.1194
	1239.81	13.6461
	1238.75	14.7317
	1237.69	-8.56129

## Sheet: Lacey Carbon TEM grid
	LACEY CARBON TEM GRID RAMAN SPECTRA DATA
	Raman shift cm-1	Count		x0 = 2127.57617
				dx = -1.09252 (cm-1)
	2127.58	317.011
	2126.48	287.508
	2125.39	337.592
	2124.3	322.738
	2123.21	309.75
	2122.11	300.563
	2121.02	316.386
	2119.93	303.73
	2118.84	290.923
	2117.74	331.502
	2116.65	296.934
	2115.56	287.689
	2114.47	326.892
	2113.37	316.629
	2112.28	322.285
	2111.19	286.039
	2110.1	283.142
	2109	309.134
	2107.91	294.973
	2106.82	341.435
	2105.73	377.124
	2104.63	326.75
	2103.54	302.235
	2102.45	354.733
	2101.36	336.568
	2100.26	320.93
	2099.17	330.944
	2098.08	338.36
	2096.99	317.726
	2095.89	318.278
	2094.8	271.106
	2093.71	309.507
	2092.62	316.83
	2091.52	299.452
	2090.43	285.621
	2089.34	351.197
	2088.25	320.823
	2087.15	282.489
	2086.06	265.05
	2084.97	274.86
	2083.88	267.464
	2082.78	305.295
	2081.69	262.301
	2080.6	300.889
	2079.51	292.502
	2078.41	302.845
	2077.32	293.586
	2076.23	286.723
	2075.14	290.263
	2074.04	313.443
	2072.95	294.069
	2071.86	322.075
	2070.77	326.884
	2069.67	282.353
	2068.58	294.3
	2067.49	268.736
	2066.4	294.071
	2065.3	321.917
	2064.21	310.067
	2063.12	327.16
	2062.02	320.939
	2060.93	278.58
	2059.84	293.483
	2058.75	299.033
	2057.65	281.903
	2056.56	286.648
	2055.47	313.845
	2054.38	270.541
	2053.28	292.221
	2052.19	263.147
	2051.1	303.019
	2050.01	303.226
	2048.91	302.072
	2047.82	305.897
	2046.73	322.734
	2045.64	314.368
	2044.54	298.206
	2043.45	308.504
	2042.36	275.739
	2041.27	281.05
	2040.17	296.406
	2039.08	301.505
	2037.99	276.001
	2036.9	305.446
	2035.8	310.78
	2034.71	287.893
	2033.62	277.715
	2032.53	245.085
	2031.43	267.96
	2030.34	281.71
	2029.25	272.531
	2028.16	278.732
	2027.06	298.537
	2025.97	332.879
	2024.88	323.402
	2023.79	301.341
	2022.69	302.166
	2021.6	332.448
	2020.51	325.497
	2019.42	318.438
	2018.32	289.503
	2017.23	315.187
	2016.14	350.041
	2015.05	343.322
	2013.95	325.217
	2012.86	305.027
	2011.77	304.118
	2010.68	308.906
	2009.58	320.66
	2008.49	333.569
	2007.4	287.613
	2006.31	293.081
	2005.21	315.063
	2004.12	324.232
	2003.03	276.781
	2001.94	275.245
	2000.84	311.833
	1999.75	300.456
	1998.66	291.477
	1997.57	328.037
	1996.47	296.809
	1995.38	298.666
	1994.29	317.388
	1993.2	285.879
	1992.1	278.408
	1991.01	303.935
	1989.92	330.743
	1988.83	280.666
	1987.73	303.99
	1986.64	277.535
	1985.55	278.547
	1984.46	283.636
	1983.36	308.694
	1982.27	285.979
	1981.18	311.964
	1980.09	320.781
	1978.99	309.812
	1977.9	320.052
	1976.81	297.211
	1975.72	306.182
	1974.62	311.013
	1973.53	340.911
	1972.44	322.685
	1971.35	281.266
	1970.25	279.327
	1969.16	275.46
	1968.07	252.286
	1966.98	256.597
	1965.88	290.492
	1964.79	311.711
	1963.7	300.806
	1962.61	282.472
	1961.51	306.748
	1960.42	286.375
	1959.33	282.076
	1958.24	316.206
	1957.14	324.529
	1956.05	274.178
	1954.96	297.246
	1953.87	291.578
	1952.77	290.487
	1951.68	299.355
	1950.59	291.924
	1949.5	291.171
	1948.4	272.868
	1947.31	300.393
	1946.22	288.479
	1945.13	292.961
	1944.03	300.188
	1942.94	313.453
	1941.85	288.654
	1940.76	287.104
	1939.66	294.509
	1938.57	297.55
	1937.48	309.797
	1936.39	329.841
	1935.29	332.84
	1934.2	331.388
	1933.11	291.534
	1932.02	302.212
	1930.92	291.312
	1929.83	285.296
	1928.74	303.785
	1927.65	312.547
	1926.55	287.541
	1925.46	289.081
	1924.37	282.752
	1923.27	274.67
	1922.18	276.587
	1921.09	297.68
	1920	285.04
	1918.9	277.294
	1917.81	288.7
	1916.72	300.468
	1915.63	299.834
	1914.53	319.276
	1913.44	285.198
	1912.35	299.198
	1911.26	301.7
	1910.16	302.638
	1909.07	294.042
	1907.98	303.342
	1906.89	273.565
	1905.79	310.7
	1904.7	291.981
	1903.61	318.942
	1902.52	321.439
	1901.42	275.067
	1900.33	311.004
	1899.24	302.19
	1898.15	289.684
	1897.05	287.645
	1895.96	268.615
	1894.87	289.157
	1893.78	294.521
	1892.68	286.521
	1891.59	290.112
	1890.5	279.317
	1889.41	282.186
	1888.31	320.209
	1887.22	322.443
	1886.13	297.474
	1885.04	338.763
	1883.94	273.808
	1882.85	302.586
	1881.76	277.154
	1880.67	323.365
	1879.57	278.539
	1878.48	277.077
	1877.39	313.206
	1876.3	303.054
	1875.2	291.645
	1874.11	275.723
	1873.02	304.245
	1871.93	327.53
	1870.83	302.931
	1869.74	302.787
	1868.65	284.97
	1867.56	294.433
	1866.46	269.476
	1865.37	300.699
	1864.28	294.419
	1863.19	313.485
	1862.09	307.286
	1861	302.666
	1859.91	306.235
	1858.82	292.592
	1857.72	273.665
	1856.63	306.602
	1855.54	283.652
	1854.45	288.542
	1853.35	305.93
	1852.26	301.723
	1851.17	290.437
	1850.08	291.347
	1848.98	286.443
	1847.89	297.52
	1846.8	307.268
	1845.71	309.485
	1844.61	317.821
	1843.52	334.119
	1842.43	304.795
	1841.34	292.568
	1840.24	278.259
	1839.15	319.747
	1838.06	273.396
	1836.97	299.563
	1835.87	286.724
	1834.78	331.091
	1833.69	289.04
	1832.6	290.777
	1831.5	294.689
	1830.41	279.984
	1829.32	267.793
	1828.23	281.968
	1827.13	283.615
	1826.04	298.366
	1824.95	319.5
	1823.86	305.023
	1822.76	303.646
	1821.67	331.649
	1820.58	323.671
	1819.49	297.013
	1818.39	305.909
	1817.3	323.694
	1816.21	275.833
	1815.12	324.041
	1814.02	291.814
	1812.93	359.148
	1811.84	285.763
	1810.75	290.853
	1809.65	299.382
	1808.56	315.477
	1807.47	317.158
	1806.38	303.248
	1805.28	322.275
	1804.19	287.327
	1803.1	297.004
	1802.01	301.63
	1800.91	294.402
	1799.82	287.734
	1798.73	313.578
	1797.64	316.161
	1796.54	293.355
	1795.45	264.741
	1794.36	302.076
	1793.27	320.77
	1792.17	321.24
	1791.08	322.465
	1789.99	293.92
	1788.89	280.839
	1787.8	296.142
	1786.71	326.458
	1785.62	313.634
	1784.52	347.325
	1783.43	310.555
	1782.34	336.895
	1781.25	303.36
	1780.15	306.553
	1779.06	298.131
	1777.97	292.423
	1776.88	274.431
	1775.78	306.243
	1774.69	315.866
	1773.6	308.942
	1772.51	328.056
	1771.41	314.06
	1770.32	317.388
	1769.23	302.28
	1768.14	292.748
	1767.04	283.089
	1765.95	313.705
	1764.86	322.229
	1763.77	314.909
	1762.67	333.747
	1761.58	311.365
	1760.49	326.773
	1759.4	305.199
	1758.3	286.975
	1757.21	290.801
	1756.12	307.659
	1755.03	279.063
	1753.93	316.719
	1752.84	294.93
	1751.75	305.248
	1750.66	337.894
	1749.56	320.246
	1748.47	303.288
	1747.38	292.232
	1746.29	341.245
	1745.19	315.967
	1744.1	318.093
	1743.01	296.163
	1741.92	315.698
	1740.82	305.144
	1739.73	337.603
	1738.64	353.984
	1737.55	316.739
	1736.45	306.54
	1735.36	315.343
	1734.27	294.996
	1733.18	306.532
	1732.08	295.042
	1730.99	299.292
	1729.9	310.288
	1728.81	326.061
	1727.71	306.006
	1726.62	296.44
	1725.53	319.659
	1724.44	337.544
	1723.34	331.881
	1722.25	337.848
	1721.16	349.092
	1720.07	334.992
	1718.97	314.328
	1717.88	310.786
	1716.79	311.326
	1715.7	337.132
	1714.6	313.572
	1713.51	294.758
	1712.42	350.53
	1711.33	347.823
	1710.23	329.203
	1709.14	325.127
	1708.05	327.089
	1706.96	349.706
	1705.86	341.25
	1704.77	324.879
	1703.68	352.475
	1702.59	344.364
	1701.49	319.528
	1700.4	317.368
	1699.31	346.032
	1698.22	386.996
	1697.12	368.599
	1696.03	364.255
	1694.94	338.482
	1693.85	327.055
	1692.75	365.513
	1691.66	391.717
	1690.57	374.487
	1689.48	363.843
	1688.38	363.564
	1687.29	366.935
	1686.2	350.052
	1685.11	371.066
	1684.01	392.843
	1682.92	370.381
	1681.83	378.343
	1680.74	366.401
	1679.64	362.04
	1678.55	392.534
	1677.46	391.099
	1676.37	374.616
	1675.27	376.434
	1674.18	386.879
	1673.09	394.254
	1672	372.863
	1670.9	358.72
	1669.81	368.209
	1668.72	362.313
	1667.63	390.974
	1666.53	391.681
	1665.44	376.747
	1664.35	393.732
	1663.26	426.434
	1662.16	418.087
	1661.07	414.406
	1659.98	412.416
	1658.89	436.569
	1657.79	415.432
	1656.7	415.051
	1655.61	448.69
	1654.52	423.421
	1653.42	417.516
	1652.33	435.352
	1651.24	426.906
	1650.14	483.132
	1649.05	421.918
	1647.96	435.48
	1646.87	474.714
	1645.77	449.592
	1644.68	473.711
	1643.59	446.327
	1642.5	455.685
	1641.4	511.003
	1640.31	463.486
	1639.22	472.071
	1638.13	467.094
	1637.03	477.136
	1635.94	518.974
	1634.85	552.183
	1633.76	476.937
	1632.66	484.11
	1631.57	515.786
	1630.48	523.425
	1629.39	500.747
	1628.29	484.291
	1627.2	532.491
	1626.11	528.076
	1625.02	564.677
	1623.92	571.328
	1622.83	569.73
	1621.74	595.113
	1620.65	556.193
	1619.55	533.347
	1618.46	563.942
	1617.37	567.56
	1616.28	625.515
	1615.18	588.399
	1614.09	608.925
	1613	573.907
	1611.91	591.516
	1610.81	618.904
	1609.72	576.896
	1608.63	572.994
	1607.54	542.983
	1606.44	597.398
	1605.35	651.307
	1604.26	608.02
	1603.17	618.963
	1602.07	602.155
	1600.98	662.568
	1599.89	685.473
	1598.8	651.592
	1597.7	663.284
	1596.61	635.24
	1595.52	631.447
	1594.43	618.082
	1593.33	676.843
	1592.24	626.818
	1591.15	646.48
	1590.06	638.399
	1588.96	666.152
	1587.87	684.979
	1586.78	654.522
	1585.69	698.486
	1584.59	648.02
	1583.5	663.249
	1582.41	673.28
	1581.32	731.891
	1580.22	657.629
	1579.13	702.332
	1578.04	676.681
	1576.95	668.929
	1575.85	631.356
	1574.76	691.987
	1573.67	684.318
	1572.58	651.682
	1571.48	678.268
	1570.39	724.046
	1569.3	723.315
	1568.21	704.658
	1567.11	696.924
	1566.02	670.203
	1564.93	663.421
	1563.84	648.454
	1562.74	686.463
	1561.65	647.372
	1560.56	632.997
	1559.47	688.015
	1558.37	692.279
	1557.28	755.116
	1556.19	737.761
	1555.1	685.985
	1554	689.021
	1552.91	650.468
	1551.82	672.688
	1550.73	662.648
	1549.63	744.126
	1548.54	702.896
	1547.45	657.383
	1546.36	714.134
	1545.26	651.803
	1544.17	710.306
	1543.08	651.885
	1541.99	624.866
	1540.89	627.008
	1539.8	658.441
	1538.71	692.086
	1537.62	663.713
	1536.52	695.813
	1535.43	672.846
	1534.34	678.178
	1533.25	699.777
	1532.15	713.666
	1531.06	716.522
	1529.97	654.225
	1528.88	679.242
	1527.78	666.008
	1526.69	682.159
	1525.6	698.242
	1524.51	660.697
	1523.41	689.613
	1522.32	660.665
	1521.23	650.579
	1520.14	696.518
	1519.04	648.978
	1517.95	634.083
	1516.86	611.975
	1515.76	652.256
	1514.67	652.761
	1513.58	697.035
	1512.49	664.909
	1511.39	655.412
	1510.3	674.008
	1509.21	648.075
	1508.12	669.497
	1507.02	678.252
	1505.93	644.946
	1504.84	664.181
	1503.75	671.6
	1502.65	655.888
	1501.56	649.947
	1500.47	630.783
	1499.38	610.146
	1498.28	635.604
	1497.19	666.064
	1496.1	660.827
	1495.01	638.314
	1493.91	619.595
	1492.82	611.807
	1491.73	623.697
	1490.64	652.292
	1489.54	652.567
	1488.45	629.795
	1487.36	612.601
	1486.27	594.251
	1485.17	609.874
	1484.08	652.086
	1482.99	652.151
	1481.9	609.703
	1480.8	627.608
	1479.71	621.743
	1478.62	639.755
	1477.53	667.712
	1476.43	662.893
	1475.34	634.324
	1474.25	649.536
	1473.16	637.536
	1472.06	619.115
	1470.97	624.629
	1469.88	617.556
	1468.79	628.856
	1467.69	602.94
	1466.6	634.058
	1465.51	600.543
	1464.42	625.798
	1463.32	627.654
	1462.23	618.786
	1461.14	642.784
	1460.05	600.194
	1458.95	591.935
	1457.86	622.264
	1456.77	578.734
	1455.68	626.224
	1454.58	583.926
	1453.49	577.17
	1452.4	602.809
	1451.31	615.711
	1450.21	591.81
	1449.12	598.798
	1448.03	619.957
	1446.94	604.266
	1445.84	626.343
	1444.75	629.866
	1443.66	612.285
	1442.57	602.829
	1441.47	619.119
	1440.38	639.577
	1439.29	628.719
	1438.2	585.622
	1437.1	567.818
	1436.01	589.358
	1434.92	620.951
	1433.83	666.766
	1432.73	658.737
	1431.64	604.309
	1430.55	622.891
	1429.46	632.153
	1428.36	632.826
	1427.27	612.836
	1426.18	603.529
	1425.09	596.644
	1423.99	602.848
	1422.9	597.07
	1421.81	591.06
	1420.72	623.857
	1419.62	567.935
	1418.53	602.348
	1417.44	585.2
	1416.35	587.252
	1415.25	597.829
	1414.16	668.428
	1413.07	597.487
	1411.98	573.549
	1410.88	595.576
	1409.79	601.779
	1408.7	612.562
	1407.61	585.058
	1406.51	568.748
	1405.42	597.166
	1404.33	617.924
	1403.24	627.16
	1402.14	596.587
	1401.05	575.954
	1399.96	594.952
	1398.87	611.094
	1397.77	599.155
	1396.68	585.336
	1395.59	587.103
	1394.5	604.271
	1393.4	608.021
	1392.31	586.903
	1391.22	609.009
	1390.13	582.81
	1389.03	544.9
	1387.94	563.642
	1386.85	573.67
	1385.76	558.561
	1384.66	591.665
	1383.57	581.673
	1382.48	610.329
	1381.39	605.942
	1380.29	616.51
	1379.2	583.779
	1378.11	624.989
	1377.01	606.903
	1375.92	601.335
	1374.83	569.224
	1373.74	584.483
	1372.64	564.593
	1371.55	567.839
	1370.46	599.919
	1369.37	608.072
	1368.27	604.592
	1367.18	602.067
	1366.09	593.191
	1365	602.319
	1363.9	585.752
	1362.81	544.964
	1361.72	564.092
	1360.63	589.142
	1359.53	584.15
	1358.44	578.237
	1357.35	584.343
	1356.26	605.429
	1355.16	549.028
	1354.07	578.648
	1352.98	556.387
	1351.89	550.851
	1350.79	578.237
	1349.7	549.285
	1348.61	593.602
	1347.52	594.237
	1346.42	547.921
	1345.33	580.235
	1344.24	543.195
	1343.15	549.22
	1342.05	571.249
	1340.96	538.817
	1339.87	535.494
	1338.78	586.317
	1337.68	594.449
	1336.59	572.812
	1335.5	570.825
	1334.41	580.955
	1333.31	596.466
	1332.22	584.408
	1331.13	566.3
	1330.04	531.301
	1328.94	517.724
	1327.85	546.17
	1326.76	520.433
	1325.67	511.613
	1324.57	534.793
	1323.48	582.852
	1322.39	534.116
	1321.3	564.322
	1320.2	545.291
	1319.11	566.413
	1318.02	542.155
	1316.93	548.429
	1315.83	545.407
	1314.74	523.973
	1313.65	534.867
	1312.56	558.813
	1311.46	556.558
	1310.37	548.115
	1309.28	548.788
	1308.19	534.022
	1307.09	509.027
	1306	514.724
	1304.91	557.352
	1303.82	586.687
	1302.72	508.46
	1301.63	539.233
	1300.54	483.317
	1299.45	549.841
	1298.35	513.349
	1297.26	519.673
	1296.17	558.902
	1295.08	551.225
	1293.98	506.854
	1292.89	529.654
	1291.8	539.708
	1290.71	507.4
	1289.61	532.462
	1288.52	540.264
	1287.43	512.146
	1286.34	510.544
	1285.24	499.531
	1284.15	498.886
	1283.06	511.043
	1281.97	510.097
	1280.87	512.559
	1279.78	549.168
	1278.69	562.811
	1277.6	562.705
	1276.5	540.049
	1275.41	513.378
	1274.32	524.895
	1273.23	529.263
	1272.13	526.406
	1271.04	535.622
	1269.95	509.918
	1268.86	491.171
	1267.76	495.943
	1266.67	471.835
	1265.58	477.097
	1264.49	499.2
	1263.39	473.814
	1262.3	516.719
	1261.21	503.672
	1260.12	476.261
	1259.02	518.585
	1257.93	506.947
	1256.84	474.178
	1255.75	566.118
	1254.65	497.936
	1253.56	479.915
	1252.47	489.905
	1251.38	483.679
	1250.28	474.233
	1249.19	488.639
	1248.1	496.888
	1247.01	493.804
	1245.91	502.381
	1244.82	476.647
	1243.73	441.713
	1242.63	473.087
	1241.54	443.86
	1240.45	458.03
	1239.36	474.614
	1238.26	505.539
	1237.17	478.986
	1236.08	422.06
	1234.99	462.207
	1233.89	471.456
	1232.8	500.232
	1231.71	461.309
	1230.62	448.778
	1229.52	442.251
	1228.43	448.937
	1227.34	452.704
	1226.25	442.688
	1225.15	452.119
	1224.06	480.393
	1222.97	492.194
	1221.88	457.996
	1220.78	438.242
	1219.69	450.164
	1218.6	460.186
	1217.51	476.236
	1216.41	456.462
	1215.32	449.974
	1214.23	444.224
	1213.14	457.503
	1212.04	444.904
	1210.95	446.098
	1209.86	471.621
	1208.77	459.436
	1207.67	421.656
	1206.58	416.307
	1205.49	421.272
	1204.4	438.435
	1203.3	450.969
	1202.21	452.368
	1201.12	424.528
	1200.03	428.457
	1198.93	411.574
	1197.84	395.183
	1196.75	414.684
	1195.66	433.792
	1194.56	449.741
	1193.47	463.263
	1192.38	455.962
	1191.29	444.866
	1190.19	429.826
	1189.1	406.542
	1188.01	409.63
	1186.92	374.68
	1185.82	389.988
	1184.73	413.991
	1183.64	397.944
	1182.55	438.258
	1181.45	408.008
	1180.36	388.288
	1179.27	404.109
	1178.18	412.087
	1177.08	437.829
	1175.99	427.458
	1174.9	397.163
	1173.81	401.859
	1172.71	408.613
	1171.62	396.678
	1170.53	401.299
	1169.44	418.245
	1168.34	365.863
	1167.25	405.46
	1166.16	370.755
	1165.07	412.147
	1163.97	416.858
	1162.88	364.052
	1161.79	376.088
	1160.7	399.2
	1159.6	396.02
	1158.51	391.496
	1157.42	391.419
	1156.33	383.967
	1155.23	375.291
	1154.14	414.564
	1153.05	357.748
	1151.96	404.993
	1150.86	394.218
	1149.77	376.968
	1148.68	364.03
	1147.59	400.897
	1146.49	398.397
	1145.4	403.88
	1144.31	401.831
	1143.22	387.502
	1142.12	376.951
	1141.03	345.728
	1139.94	352.366
	1138.85	382.357
	1137.75	387.33
	1136.66	373.514
	1135.57	395.611
	1134.48	358.493
	1133.38	388.8
	1132.29	389.619
	1131.2	400.822
	1130.11	418.27
	1129.01	414.854
	1127.92	389.391
	1126.83	366.352
	1125.74	368.608
	1124.64	357.666
	1123.55	371.846
	1122.46	367.87
	1121.37	383.189
	1120.27	373.976
	1119.18	392.686
	1118.09	361.732
	1117	358.294
	1115.9	357.355
	1114.81	361.612
	1113.72	376.218
	1112.63	380.331
	1111.53	392.961
	1110.44	375.283
	1109.35	348.219
	1108.26	352.036
	1107.16	359.659
	1106.07	353.46
	1104.98	350.332
	1103.88	335.709
	1102.79	345.847
	1101.7	346.286
	1100.61	331.181
	1099.51	332.85
	1098.42	352.424
	1097.33	363.093
	1096.24	325.868
	1095.14	359.182
	1094.05	339.764
	1092.96	372.957
	1091.87	347.196
	1090.77	329.558
	1089.68	333.49
	1088.59	352.862
	1087.5	335.971
	1086.4	325.238
	1085.31	370.453
	1084.22	368.796
	1083.13	338.116
	1082.03	367.346
	1080.94	323.092
	1079.85	363.031
	1078.76	349.198
	1077.66	363.089
	1076.57	354.096
	1075.48	362.871
	1074.39	369.746
	1073.29	345.069
	1072.2	320.766
	1071.11	314.957
	1070.02	309.142
	1068.92	304.646
	1067.83	339.015
	1066.74	337.468
	1065.65	343.263
	1064.55	333.625
	1063.46	324.54
	1062.37	313.368
	1061.28	321.248
	1060.18	331.355
	1059.09	314.006
	1058	327.621
	1056.91	326.473
	1055.81	334.027
	1054.72	318.933
	1053.63	312.151
	1052.54	313.976
	1051.44	337.742
	1050.35	327.438
	1049.26	321.198
	1048.17	334.926
	1047.07	329.993
	1045.98	323.831
	1044.89	337.052
	1043.8	348.768
	1042.7	284.274
	1041.61	280.804
	1040.52	285.756
	1039.43	303.695
	1038.33	331.068
	1037.24	330.571
	1036.15	310.143
	1035.06	308.568
	1033.96	313.489
	1032.87	288.767
	1031.78	303.77
	1030.69	316.916
	1029.59	288.395
	1028.5	307.237
	1027.41	317.052
	1026.32	310.747
	1025.22	314.862
	1024.13	313.471
	1023.04	297.841
	1021.95	308.119
	1020.85	294.948
	1019.76	298.647

## Sheet: Figure S-11
	FIGURE S-11 RAMAN DATA
	Raman shift cm-1	Counts				x0 = 1392.88281
	1392.88	232.99	492.863	197.145		dx = -1.22881 (cm-1)
	1391.65	265.871	504.666	219.472
	1390.43	235.589	474.882	177.828
	1389.2	222.174	500.808	181.936
	1387.97	237.397	500.476	206.45
	1386.74	251.837	483.581	202.536
	1385.51	254.252	502.721	206.877
	1384.28	237.775	479.608	225.828
	1383.05	244.796	469.365	199.899
	1381.82	224.047	489.906	204.474
	1380.59	257.209	496.463	212.401
	1379.37	268.735	496.567	192.941
	1378.14	251.706	482.41	188.686
	1376.91	250.75	506.403	229.969
	1375.68	251.658	495.005	229.313
	1374.45	255.664	476.661	203.508
	1373.22	244.224	506.131	203.917
	1371.99	253.996	496.151	208.915
	1370.76	235.777	496.493	189.574
	1369.54	235.6	519.54	224.788
	1368.31	247.548	476.209	243.046
	1367.08	251.681	547.764	248.994
	1365.85	273.748	554.912	213.51
	1364.62	264.028	524.8	215.356
	1363.39	229.243	512.586	210.579
	1362.16	241.28	538.178	222.249
	1360.93	235.322	535.835	224.976
	1359.7	249.4	533.155	243.482
	1358.48	234.502	514.715	227.817
	1357.25	244.213	498.209	190.416
	1356.02	188.621	498.832	233.049
	1354.79	248.472	536.167	211.653
	1353.56	223.244	524.804	213.468
	1352.33	228.571	536.39	217.482
	1351.1	243.632	486.833	226.813
	1349.87	250.147	476.088	224.507
	1348.65	239.278	494.174	233.389
	1347.42	238.474	527.63	204.658
	1346.19	205.126	476.801	189.385
	1344.96	203.919	505.469	224.683
	1343.73	236.043	488.972	247.369
	1342.5	207.681	544.975	190.675
	1341.27	257.339	476.009	206.25
	1340.04	220.84	509.607	199.275
	1338.82	231.679	490.165	196.575
	1337.59	222.976	521.076	206.646
	1336.36	228.676	499.598	218.877
	1335.13	215.534	506.831	199.061
	1333.9	218.385	517.539	199.678
	1332.67	234.634	550.719	221.739
	1331.44	220.73	546.429	201.679
	1330.21	252.413	543.232	238.327
	1328.98	216.24	519.626	202.933
	1327.76	241.642	537.906	225.611
	1326.53	216.267	549.973	220.346
	1325.3	256.105	518.021	231.782
	1324.07	228.28	528.182	222.346
	1322.84	203.038	540.997	233.345
	1321.61	228.395	571.717	219.134
	1320.38	259.085	541.847	203.782
	1319.15	258.679	517.476	209.945
	1317.93	238.656	523.217	226.772
	1316.7	255.672	530.343	239.769
	1315.47	200.009	503.784	220.183
	1314.24	229.641	520.281	245.43
	1313.01	266.525	577.35	240.574
	1311.78	233.496	540.626	236.66
	1310.55	256.3	527.647	241.935
	1309.32	250.61	551.232	233.7
	1308.09	218.592	557.153	208.488
	1306.87	199.874	549.762	216.583
	1305.64	196.009	498.661	220.823
	1304.41	260.721	500.257	213.421
	1303.18	257.847	522.852	220.66
	1301.95	221.811	553.512	240.998
	1300.72	196.751	521.457	249.412
	1299.49	213.208	563.095	201.259
	1298.26	227.084	511.557	233.591
	1297.04	214.035	524.496	233.295
	1295.81	218.328	549.092	246.209
	1294.58	235.354	562.974	243.414
	1293.35	254.633	552.341	234.683
	1292.12	253.435	528.105	253.553
	1290.89	223.542	519.393	225.778
	1289.66	221.444	539.895	218.155
	1288.43	208.307	535.126	255.077
	1287.21	176.747	525.102	211.918
	1285.98	204.643	511.097	233.306
	1284.75	240.544	513.616	215.143
	1283.52	238.55	516.467	204.167
	1282.29	195.389	502.876	197.252
	1281.06	202.91	491.504	231.522
	1279.83	208.897	461.822	249.962
	1278.6	195.623	510.759	236.831
	1277.37	209.85	513.939	239.335
	1276.15	216.943	524.758	247.852
	1274.92	208.067	563.301	247.858
	1273.69	163.546	528.882	259.075
	1272.46	204.697	555.851	241.988
	1271.23	189.654	585.9	248.038
	1270	215.632	541.666	264.296
	1268.77	184.373	527.886	242.408
	1267.54	210.736	558.088	280.186
	1266.32	205.159	535.391	239.357
	1265.09	209.72	525.325	235.769
	1263.86	199.226	547.516	227.337
	1262.63	208.058	531.965	247.966
	1261.4	248.024	505.482	265.099
	1260.17	243.029	495.555	239.072
	1258.94	190.849	494.581	239.814
	1257.71	210.63	501.044	227.23
	1256.48	237.07	532.079	221.603
	1255.26	186.753	547.835	245.274
	1254.03	243.553	524.951	243.09
	1252.8	192.573	491.268	239.724
	1251.57	207.146	533.777	231.221
	1250.34	173.668	496.686	221.883
	1249.11	184.191	504.984	210.475
	1247.88	192.304	498.577	186.888
	1246.65	204.601	509.76	191.246
	1245.43	228.48	547.599	196.412
	1244.2	215.612	504.479	227.62
	1242.97	211.104	463.692	215.323
	1241.74	186.775	459.278	207.018
	1240.51	183.462	502.598	207.728
	1239.28	179.364	481.542	233.338
	1238.05	181.529	444.156	225.632
	1236.82	187.948	452.086	197.231
	1235.6	217.613	455.339	215.428
	1234.37	205.096	474.414	208.3
	1233.14	190.37	474.871	205.568
	1231.91	197.364	488.422	216.527
	1230.68	197.384	492.317	216.103
	1229.45	201.844	481.233	230.624
	1228.22	198.407	463.8	238.659
	1226.99	205.387	478.365	205.237
	1225.76	215.777	481.337	200.507
	1224.54	225.559	440.669	227.072
	1223.31	164.142	452.121	202.853
	1222.08	209.22	455.648	191.866
	1220.85	195.256	466.649	203.975
	1219.62	184.297	442.69	189.613
	1218.39	195.438	457.561	183.884
	1217.16	212.836	474.766	210.072
	1215.93	214.457	479.1	196.902
	1214.71	191.116	420.115	191.47
	1213.48	182.831	440.835	199.32
	1212.25	177.374	477.206	215.162
	1211.02	168.372	465.5	212.982
	1209.79	192.029	472.955	189.465
	1208.56	207.362	491.85	216.877
	1207.33	190.487	447.943	229.863
	1206.1	169.201	470.929	190.923
	1204.87	199.369	431.35	180.584
	1203.65	222.741	432.988	169.365
	1202.42	198.678	441.936	208.889
	1201.19	190.242	446.006	218.384
	1199.96	183.461	439.38	243.233
	1198.73	156.708	432.599	217.201
	1197.5	173.379	430.723	195.329
	1196.27	164.423	445.104	197.12
	1195.04	177.69	451.201	216.068
	1193.82	190.227	443.285	188.057
	1192.59	199.376	457.922	174.509
	1191.36	177.978	451.675	197.336
	1190.13	173.838	461.245	187.754
	1188.9	177.505	447.752	163.667
	1187.67	171.82	444.473	202.229
	1186.44	181.915	431.589	176.075
	1185.21	208.649	421.406	236.191
	1183.99	178.927	439.629	194.841
	1182.76	188.87	429.854	210.923
	1181.53	192.195	405.837	207.571
	1180.3	201.077	442.451	184.907
	1179.07	197.102	432.557	187.528
	1177.84	176.29	408.741	185.648
	1176.61	201.301	401.482	199.139
	1175.38	225.046	408.864	206.465
	1174.15	200.557	424.894	199.892
	1172.93	194.993	403.537	199.51
	1171.7	161.464	378.393	201.69
	1170.47	173.914	395.252	196.184
	1169.24	194.636	398.028	183.154
	1168.01	194.65	383.458	165.289
	1166.78	222.519	419.44	181.568
	1165.55	205.391	481.411	195.751
	1164.32	211.753	412.817	185.799
	1163.1	235.382	405.63	194.755
	1161.87	209.991	428.601	170.584
	1160.64	220.057	421.498	172.989
	1159.41	198.749	401.638	183.33
	1158.18	162.842	377.827	210.195
	1156.95	172.603	397.083	191.118
	1155.72	186.899	413.127	177.846
	1154.49	201.062	426.046	188.757
	1153.26	188.159	399.38	202.033
	1152.04	187.417	405.448	203.224
	1150.81	205.057	430.483	211.154
	1149.58	201.691	420.623	196.822
	1148.35	194.486	406.209	191.949
	1147.12	175.062	404.981	152.006
	1145.89	174.153	415.79	180.435
	1144.66	165.335	419.522	167.018
	1143.43	184.862	418.929	198.329
	1142.21	194.124	431.663	180.04
	1140.98	186.106	389.53	197.804
	1139.75	184.942	367.241	190.516
	1138.52	176.382	396.357	214.329
	1137.29	158.58	409.419	224.195
	1136.06	179.242	416.366	197.03
	1134.83	169.785	405.565	173.342
	1133.6	150.911	388.953	160.325
	1132.38	158.257	353.409	188.073
	1131.15	170.373	344.714	182.605
	1129.92	207.132	357.463	203.82
	1128.69	167.225	392.791	201.984
	1127.46	183.284	376.686	194.026
	1126.23	178.735	401.766	209.337
	1125	152.574	435.546	221.028
	1123.77	189.167	383.857	172.71
	1122.54	195.483	379.414	191.793
	1121.32	195.012	399.453	182.564
	1120.09	187.78	416.949	193.82
	1118.86	194.32	384.727	189.285
	1117.63	162.689	387.556	196.994
	1116.4	171.78	397.728	202.079
	1115.17	168.68	393.599	174.91
	1113.94	178.708	415.021	167.735
	1112.71	172.831	398.062	177.678
	1111.49	169.063	413.311	189.444
	1110.26	192.613	436.516	174.545
	1109.03	182.7	417.407	179.813
	1107.8	179.759	382.882	202.695
	1106.57	200.64	398.37	158.27
	1105.34	192.741	386.312	178.135
	1104.11	188.488	396.428	210.924
	1102.88	171.984	420.207	207.81
	1101.65	203.069	399.944	183.886
	1100.43	144.26	410.563	162.17
	1099.2	164.441	372.194	159.559
	1097.97	180.046	374.04	189.9
	1096.74	161.846	371.798	186.317
	1095.51	132.55	368.082	173.516
	1094.28	160.095	381.717	165.665
	1093.05	179.399	383.929	188.697
	1091.82	179.364	389.898	199.497
	1090.6	166.778	370.203	199.97
	1089.37	146.193	368.26	189.987
	1088.14	137.319	366.05	205.74
	1086.91	156.168	354.178	199.289
	1085.68	190.018	370.826	192.622
	1084.45	190.097	365.635	185.182
	1083.22	191.861	428.565	189.182
	1081.99	155.155	394.54	173.295
	1080.77	180.735	399.1	207.761
	1079.54	159.156	366.832	207.676
	1078.31	163.51	398.078	224.608
	1077.08	197.494	387.949	198.625
	1075.85	143.129	383.989	174.773
	1074.62	157.42	400.743	182.252
	1073.39	155.942	358.891	219.647
	1072.16	162.164	397.698	186.908
	1070.93	169.042	392.659	165.698
	1069.71	161.149	375.888	179.564
	1068.48	185.963	372.719	190.217
	1067.25	164.525	389.538	176.242
	1066.02	165.873	374.278	186.34
	1064.79	160.214	377.019	184.225
	1063.56	150.987	365.009	189.251
	1062.33	163.454	363.236	187.03
	1061.1	153.138	350.435	185.771
	1059.88	170.209	340.643	190.101
	1058.65	181.299	378.66	165.093
	1057.42	173.263	407.021	146.277
	1056.19	152.829	367.218	189.081
	1054.96	178.567	372.663	183.528
	1053.73	193.887	376.019	192.509
	1052.5	174.671	364.389	212.048
	1051.27	185.577	388.287	175.072
	1050.04	201.033	347.209	165.662
	1048.82	205.197	341.894	186.747
	1047.59	148.536	389.614	199.965
	1046.36	153.51	377.883	211.999
	1045.13	181.996	360.146	205.052
	1043.9	177.498	353.316	170.451
	1042.67	166.652	379.663	210.289
	1041.44	170.489	360.178	188.777
	1040.21	162.859	399.846	174.114
	1038.99	157.526	367.46	203.495
	1037.76	172.907	358.822	201.6
	1036.53	189.187	375.644	187.541
	1035.3	169.532	369.215	210.493
	1034.07	149.254	364.958	190.3
	1032.84	172.08	367.67	195.655
	1031.61	172.397	386.673	187.086
	1030.38	164.431	386.246	166.257
	1029.16	193.543	414.105	193.579
	1027.93	178.204	392.76	211.594
	1026.7	161.728	369.952	202.538
	1025.47	186.834	369.306	167.459
	1024.24	178.85	361.09	213.595
	1023.01	166.291	375.314	209.767
	1021.78	162.838	362.958	188.139
	1020.55	166.5	355.162	146.569
	1019.32	164.725	373.022	170.092
	1018.1	200.44	363.284	168.894
	1016.87	184.115	431.875	182.448
	1015.64	194.883	413.802	205.474
	1014.41	177.84	390.157	213.699
	1013.18	166.287	372.963	199.265
	1011.95	166.843	367.537	186.088
	1010.72	169.513	352.531	198.553
	1009.49	145.525	363.445	172.375
	1008.27	149.224	376.089	182.02
	1007.04	150.258	353.908	191.04
	1005.81	169.72	371.864	181.506
	1004.58	160.349	374.098	173.109
	1003.35	136.345	365.988	195.443
	1002.12	150.007	362.941	203.496
	1000.89	168.512	373.417	193.893
	999.664	160.832	370.115	207.031
	998.435	176.331	388.414	199.253
	997.206	173.363	394.205	189.224
	995.977	153.682	360.814	158.008
	994.748	181.292	355.573	172.881
	993.52	183.588	389.978	166.223
	992.291	152.123	374.94	177.956
	991.062	160.854	359.16	215.936
	989.833	142.193	341.907	197.627
	988.604	168.403	331.156	175.251
	987.376	159.65	362.809	177.742
	986.147	149.884	377.026	182.311
	984.918	174.687	362.169	204.34
	983.689	153.904	350.869	150.667
	982.46	170.098	384.017	176.294
	981.231	202.54	361.572	174.742
	980.003	174.409	379.463	190.094
	978.774	175.095	380.672	183.497
	977.545	149.49	425.939	223.221
	976.316	180.765	392.1	156.928
	975.087	175.443	363.988	162.997
	973.859	182.524	392.776	185.162
	972.63	144.12	406.566	154.484
	971.401	128.411	378.148	188.329
	970.172	160.98	346.939	177.729
	968.943	163.289	380.615	162.607
	967.715	157.661	390.348	179.673
	966.486	165.439	353.127	214.513
	965.257	175.078	340.813	191.426
	964.028	176.831	369.581	191.741
	962.799	161.793	397.307	191.817
	961.57	175.805	397.355	190.528
	960.342	172.007	381.008	186.335
	959.113	171.107	387.579	180.382
	957.884	164.472	396.858	197.618
	956.655	169.754	389.888	200.458
	955.426	138.391	383.936	195.103
	954.198	155.107	358.407	195.74
	952.969	173.401	408.402	205.181
	951.74	170.324	390.341	181.49
	950.511	167.581	364.36	185.432
	949.282	162.145	384.049	176.958
	948.054	154	387.003	163.154
	946.825	138.441	373.944	181.595
	945.596	200.151	353.524	167.802
	944.367	173.8	374.51	166.669
	943.138	176.554	411.717	199.136
	941.91	151.939	399.437	176.965
	940.681	190.129	402.267	197.152
	939.452	177.442	388.004	183.697
	938.223	205.948	397.921	170.69
	936.994	158.589	376.844	144.486
	935.765	164.482	422.563	166.526
	934.537	162.824	353.109	199.417
	933.308	165.306	409.757	213.975
	932.079	157.303	386.254	192.113
	930.85	179.051	386.171	194.13
	929.621	175.387	425.999	193.246
	928.393	157.759	415.909	219.099
	927.164	159.269	389.566	172.001
	925.935	175.656	392.633	173.795
	924.706	191.913	399.492	164.873
	923.477	173.654	395.947	166.966
	922.249	133.14	390.244	179.384
	921.02	142.791	413.767	197.518
	919.791	148.182	393.555	184.245
	918.562	177.953	415.347	186.755
	917.333	167.331	414.656	194.863
	916.105	182.274	423.93	197.336
	914.876	176.789	430.811	197.298
	913.647	180.128	415.725	192.504
	912.418	177.899	390.56	183.862
	911.189	175.368	387.096	181.615
	909.96	174.006	409.53	176.16
	908.732	172.703	418.465	195.879
	907.503	173.763	410.741	218.977
	906.274	176.065	422.647	207.865
	905.045	184.121	416.47	220.112
	903.816	191.707	422.978	204.879
	902.588	185.632	431.913	197.093
	901.359	165.413	425.66	215.288
	900.13	170.017	415.739	203.601
	898.901	176.093	432.307	210.486
	897.672	187.809	405.938	191.05
	896.444	203.134	426.033	180.168
	895.215	185.487	442.028	180.134
	893.986	170.147	444.58	181.676
	892.757	193.464	438.535	217.633
	891.528	184.245	413.556	202.907
	890.3	195.131	474.842	198.23
	889.071	183.119	418.093	193.426
	887.842	164.159	424.314	199.346
	886.613	180.927	404.811	182.715
	885.384	189.444	417.414	201.656
	884.155	142.075	438.089	210.178
	882.927	211.715	408.169	186.311
	881.698	182.659	435.587	187.717
	880.469	185.564	480.774	207.453
	879.24	177.978	503.073	216.513
	878.011	203.684	429.594	202.775
	876.783	177.913	413.114	179.922
	875.554	173.441	431.488	196.107
	874.325	203.95	474.178	200.091
	873.096	182.372	443.457	194.996
	871.867	209.096	438.458	229.18
	870.639	224.238	461.917	232.253
	869.41	215.811	459.143	218.006
	868.181	230.536	448.085	211.188
	866.952	203.682	433.518	217.339
	865.723	197.401	437.406	191.002
	864.495	177.22	430.147	213.561
	863.266	180.866	466.92	181.794
	862.037	207.618	455.206	197.138
	860.808	222.27	482.496	198.265
	859.579	193.37	435.929	216.672
	858.35	205.567	411.143	191.312
	857.122	182.727	450.721	204.961
	855.893	204.503	467.627	222.064
	854.664	202.31	447.347	211.662
	853.435	205.713	475.524	227.236
	852.206	190.098	469.262	210.292
	850.978	200.949	483.691	214.938
	849.749	197.404	467.802	221.937
	848.52	217.078	466.784	218.102
	847.291	200.216	466.214	219.925
	846.062	210.55	488.689	203.541
	844.834	191.868	475.292	187.134
	843.605	196.725	458.059	195.084
	842.376	210.259	458.637	218.474
	841.147	208.739	468.815	207.393
	839.918	223.872	486.54	206.149
	838.689	216.125	489.323	207.403
	837.461	186.744	487.199	181.746
	836.232	173.867	474.709	186.271
	835.003	179.605	472.826	199.995
	833.774	224.029	476.302	201.945
	832.545	223.072	484.458	212.456
	831.317	218.148	451.065	223.461
	830.088	204.527	449.119	220.176
	828.859	199.144	476.27	196.194
	827.63	200.167	443.457	201.763
	826.401	210.135	448.07	215.702
	825.173	215.332	466.045	230.364
	823.944	212.074	491.446	209.358
	822.715	207.217	488.773	201.074
	821.486	201.733	476.603	212.343
	820.257	203.405	473.441	234.106
	819.029	217.176	452.112	236.42
	817.8	214.659	457.148	219.831
	816.571	203.307	483.549	195.667
	815.342	179.959	487.808	205.938
	814.113	173.219	472.689	222.931
	812.884	211.411	480.122	215.755
	811.656	209.594	501.811	201.385
	810.427	190.045	515.038	225.922
	809.198	199.391	511.604	249.141
	807.969	191.589	466.199	239.015
	806.74	182.07	453.836	240.02
	805.512	195.128	472.924	219.823
	804.283	199.109	475.631	201.151
	803.054	191.484	483.223	218.151
	801.825	186.916	494.02	239.131
	800.596	207.119	522.96	229.686
	799.368	186.427	486.846	215.168
	798.139	188.957	472.785	221.839
	796.91	217.116	492.574	213.017
	795.681	226.064	496.652	219.681
	794.452	212.307	480.881	226.52
	793.224	184.751	479.884	213.651
	791.995	171.725	492.594	207.672
	790.766	181.598	499.247	209.137
	789.537	208.072	515.988	223.048
	788.308	208.753	528.125	229.943
	787.079	202.929	516.675	226.946
	785.851	207.877	474.799	233.852
	784.622	207.412	483.402	216.566
	783.393	201.045	494.143	231.222
	782.164	206.378	478.87	240.413
	780.935	209.116	461.437	241.559
	779.707	205.437	449.521	259.876
	778.478	202.029	441.575	244.159
	777.249	189.163	437.362	238.945
	776.02	187.649	442.464	236.808
	774.791	204.262	481.994	220.935
	773.563	198.885	502.064	234.35
	772.334	204.704	488.154	231.008
	771.105	209.409	467.942	219.758
	769.876	215.44	458.255	236.675
	768.647	224.123	499.478	238.924
	767.419	218.003	535.204	244.602
	766.19	222.805	513.882	279.78
	764.961	217.365	527.956	284.045
	763.732	199.385	526.592	266.617
	762.503	197.031	521.665	248.656
	761.274	202.939	542.625	252.384
	760.046	204.82	528.626	247.523
	758.817	217.442	524.49	248.103
	757.588	231.163	545.709	250.898
	756.359	229.961	535.532	245.45
	755.13	223.861	508.514	260.523
	753.902	230.038	515.744	255.165
	752.673	219.776	517.547	240.037
	751.444	213.549	514.344	258.033
	750.215	227.781	489.599	277.444
	748.986	227.783	492.95	267.45
	747.758	229.624	508.959	252.267
	746.529	226.949	482.709	262.214
	745.3	227.214	484.416	261.243
	744.071	229.025	484.717	250.932
	742.842	243.821	505.496	276.092
	741.614	259.804	530.205	293.752
	740.385	259.519	511.234	276.664
	739.156	268.446	514.6	256.651
	737.927	257.482	543.402	267.659
	736.698	258.327	553.349	279.962
	735.469	262.764	552.641	283.938
	734.241	268.692	552.317	270.32
	733.012	281.414	557.148	280.024
	731.783	277.008	528.236	289.958
	730.554	287.459	531.111	304.473
	729.325	297.903	561.667	326.686
	728.097	300.721	579.95	309.301
	726.868	287.11	553.995	291.684
	725.639	293.501	557.01	305.634
	724.41	298.461	597.562	318.861
	723.181	324.662	567.369	319.828
	721.953	317.937	557.928	316.451
	720.724	303.735	539.146	329.509
	719.495	306.713	558.522	318.176
	718.266	308.423	556.204	324.602
	717.037	304.878	584.914	305.558
	715.808	342.69	611.845	287.009
	714.58	345.1	593.371	334.13
	713.351	334.671	609.967	336.911
	712.122	330.661	626.042	317.075
	710.893	336.956	600.575	333.126
	709.664	347.533	584.038	363.184
	708.436	335.071	609.586	328.152
	707.207	348.938	620.245	333.002
	705.978	356.436	606.601	331.736
	704.749	348.183	615.931	373.501
	703.52	374.917	666.977	374.759
	702.292	369.535	640.682	359.868
	701.063	368.083	625.124	411.093
	699.834	374.146	664.215	398.703
	698.605	401.043	620.776	352.325
	697.376	393.906	621.779	342.577
	696.148	378.561	633.172	336.967
	694.919	370.315	655.352	352.418
	693.69	380.436	641.226	362.478
	692.461	394.338	630.942	351.598
	691.232	407.657	704.02	358.914
	690.003	371.238	654.383	393.564
	688.775	373.354	664.082	341.397
	687.546	387.088	670.035	363.055
	686.317	388.993	717.368	374.851
	685.088	392.847	694.3	406.154
	683.859	364.006	678.15	360.714
	682.631	358.954	639.512	385.244
	681.402	366.116	681.881	384.856
	680.173	388.587	670.495	366.331
	678.944	388.78	665.393	375.34
	677.715	369.047	680.781	415.401
	676.487	390.733	726.197	392.665
	675.258	394.364	654.307	374.729
	674.029	364.193	690.632	372.273
	672.8	374.578	674.172	391.863
	671.571	363.699	722.781	386.518
	670.343	372.622	720.428	396.626
	669.114	374.459	699.097	373.888
	667.885	381.432	669.835	395.958
	666.656	392.654	704.295	391.169
	665.427	394.338	683.755	397.243
	664.198	388.112	701.616	361.184
	662.97	382.914	707.162	389.899
	661.741	359.047	704.523	387.689
	660.512	369.443	714.084	388.386
	659.283	371.412	715.157	392.899
	658.054	379.948	728.571	415.618
	656.826	370.462	729.203	412.382
	655.597	358.394	702.037	384.392
	654.368	350.402	689.739	377.547
	653.139	369.643	692.301	371.53
	651.91	376.628	687.067	395.709
	650.682	370.785	690.896	418.947
	649.453	360.158	717.76	389.127
	648.224	346.827	730.431	378.34
	646.995	364.806	724.994	381.753
	645.766	366.112	723.653	390.089
	644.538	360.542	699.759	409.293
	643.309	356.98	687.841	372.917
	642.08	327.397	701.423	369.019
	640.851	312.486	673.305	389.034
	639.622	337.378	660.948	388.983
	638.393	340.984	700.689	400.692
	637.165	326.608	718.371	391.032
	635.936	330.627	737.365	377.983
	634.707	308.56	718.583	356.619
	633.478	312.746	679.952	395.023
	632.249	301.773	671.942	393.168
	631.021	319.341	714.208	366.985
	629.792	324.256	694.833	396.631
	628.563	311.227	702.053	405.573
	627.334	304.214	703.044	418.417
	626.105	307.147	676.71	365.233
	624.877	324.802	695.917	391.909
	623.648	297.988	713.093	406.943
	622.419	303.752	718.779	387.466
	621.19	311.418	699.59	366.115
	619.961	302.332	655.87	372.7
	618.733	298.04	680.17	358.601
	617.504	301.174	679.064	353.641
	616.275	287.826	700.81	349.705
	615.046	303.969	719.162	355.772
	613.817	302.545	746.108	366.664
	612.588	285.725	704.501	392.291
	611.36	310.283	694.896	383.321
	610.131	316.186	724.955	382.961
	608.902	292.516	750.723	342.124
	607.673	305.069	766.373	368.417
	606.444	305.822	740.529	398.719
	605.216	274.693	721.123	390.232
	603.987	289.435	740.433	414.61
	602.758	292.779	783.017	418.34
	601.529	266.852	769.725	393.747
	600.3	260.5	765.03	389.14
	599.072	272.043	794.414	406.569
	597.843	289.179	790.181	415.687
	596.614	290.145	784.994	418.421
	595.385	291.615	806.805	401.756
	594.156	286.461	808.341	384.86
	592.927	262.105	809.983	421.505
	591.699	286.012	830.993	415.932
	590.47	279.844	792.207	381.984
	589.241	289.91	806.585	392.97
	588.012	285.082	864.897	416.858
	586.783	308.269	845.299	408.687
	585.555	258.794	851.699	404.857
	584.326	297.207	866.214	418.23
	583.097	309.655	789.306	395.27
	581.868	276.509	808.334	400.515
	580.639	245.232	873.113	417.533
	579.411	307.874	831.223	407.145
	578.182	256.559	850.137	427.782
	576.953	290.922	857.625	374.174
	575.724	286.228	826.065	385.658
	574.495	303.794	804.246	404.33
	573.267	275.998	784.814	385.19
	572.038	261.905	777.292	382.286
	570.809	269.713	811.63	380.606
	569.58	288.852	766.835	386.361
	568.351	284.54	783.495	373.136
	567.122	260.263	759.432	366.794
	565.894	258.77	752.912	358.045
	564.665	286.315	755.836	367.208
	563.436	284.396	745.872	359.179
	562.207	267.324	744.461	358.367
	560.978	262.736	731.097	371.608
	559.75	273.858	727.169	353.94
	558.521	274.497	718.111	348.72
	557.292	280.685	711.603	369.286
	556.063	292.971	737.828	375.152
	554.834	270.435	764.649	374.288
	553.606	256.668	771.721	379.195
	552.377	281.276	747.555	385.509
	551.148	298.566	730.991	372.126
	549.919	297.521	744.861	401.14
	548.69	295.378	772.25	398.196
	547.462	300.538	778.833	364.429
	546.233	302.634	769.17	379.103
	545.004	259.912	777.105	381.58
	543.775	269.928	759.207	387.893
	542.546	307.51	733.818	381.111
	541.317	296.141	737.357	394.192
	540.089	292.307	712.657	386.561
	538.86	284.826	748.162	351.57
	537.631	294.739	782.288	355.921
	536.402	262.328	775.803	383.568
	535.173	271.162	777.196	420.135
	533.945	320.364	786.97	396.348
	532.716	277.408	758.646	399.522
	531.487	301.519	770.286	390.927
	530.258	286.27	751.652	393.609
	529.029	272.631	705.734	392.425
	527.801	288.012	739.49	399.988
	526.572	294.165	726.856	389.55
	525.343	299.645	715.101	380.725
	524.114	304.289	731.889	385.354
	522.885	291.676	738.32	390.468
	521.657	281.195	775.646	392.212
	520.428	285.614	779.271	388.7
	519.199	287.379	734.99	387.209
	517.97	288.951	721.405	377.451
	516.741	297.562	720.63	395.138
	515.512	284.937	788.758	393.958
	514.284	297.214	778.338	360.039
	513.055	291.968	770.594	361.089
	511.826	312.553	751.514	410.915
	510.597	312.133	751.017	379.502
	509.368	267.523	780.585	396.219
	508.14	295.543	763.595	401.758
	506.911	307.347	766.418	414.498
	505.682	292.729	783.752	394.857
	504.453	288.942	720.433	383.803
	503.224	313.454	728.003	411.711
	501.996	324.134	719.729	388.176
	500.767	293.479	747.335	393.437
	499.538	308.108	791.421	413.889
	498.309	299.404	768.601	424.523
	497.08	303.507	763.23	436.9
	495.852	318.695	778.332	395.263
	494.623	308.599	789.633	390.531
	493.394	295.925	772.341	433.504
	492.165	300.719	776.38	432.964
	490.936	309.658	817.207	424.703
	489.707	317.093	791.487	416.659
	488.479	312.182	763.725	386.845
	487.25	278.683	771.552	392.35
	486.021	276.103	803.827	407.007
	484.792	286.527	750.998	449.426
	483.563	302.346	799.292	446.416
	482.335	311.702	817.988	407.533
	481.106	321.877	813.466	398.87
	479.877	284.721	774.362	426.615
	478.648	332.221	814.512	400.323
	477.419	327.415	798.773	435.8
	476.191	319.708	836.703	421.275
	474.962	321.45	865.984	403.561
	473.733	303.406	835.35	408.512
	472.504	310.457	805.2	410.051
	471.275	308.662	836.666	394.199
	470.046	330.423	829.196	402.491
	468.818	314.62	777.072	427.213
	467.589	291.91	793.177	428.3
	466.36	288.376	812.016	412.456
	465.131	295.637	784.551	391.357
	463.902	303.694	786.757	386.45
	462.674	277.893	795.117	402.026
	461.445	274.28	781.667	392.651
	460.216	292.911	755.653	421.275
	458.987	294.699	768.888	431.41
	457.758	297.246	795.506	401.96
	456.53	304.398	794.312	398.276
	455.301	308.13	799.725	414.691
	454.072	263.867	755.368	429.347
	452.843	295.688	785.286	434.927
	451.614	243.061	770.131	411.234
	450.386	247.259	746.753	362.787
	449.157	257.033	765.298	385.775
	447.928	287.536	796.984	405.767
	446.699	285.702	767.471	364.601
	445.47	272.814	765.81	408.044
	444.241	265.157	784.975	423.964
	443.013	272.031	792.004	402.277
	441.784	269.727	804.985	385.608
	440.555	267.159	803.6	398.993
	439.326	280.233	780.116	427.557
	438.097	276.037	779.164	415.014
	436.869	263.241	793.108	396.774
	435.64	265.262	796.033	384.006
	434.411	244.073	778.023	368.706
	433.182	226.42	799.962	395.206
	431.953	256.421	809.923	444.411
	430.725	231.403	809.362	406.69
	429.496	233.184	790.943	401.133
	428.267	231.435	753.111	365.567
	427.038	261.177	791.161	395.534
	425.809	275.223	842.829	410.08
	424.581	240.914	800.798	412.199
	423.352	256.263	840.695	422.958
	422.123	290.147	848.257	436.199
	420.894	281.595	830.151	446.571
	419.665	257.105	834.191	415.969
	418.436	246.359	855.053	411.194
	417.208	239.34	865.198	423.399
	415.979	247.315	867.586	421.164
	414.75	270.548	853.292	448.677
	413.521	271.267	818.754	454.824
	412.292	280.968	868.847	453.412
	411.064	292.627	895.711	448.67
	409.835	275.407	858.569	497.685
	408.606	280.517	889.216	448.314
	407.377	280.463	919.893	460.93
	406.148	302.001	873.187	460.946
	404.92	251.003	945.924	469.308
	403.691	256.47	965.579	481.434
	402.462	262.075	937.991	486.656
	401.233	264.283	961.556	488.82
	400.004	277.321	969.714	478.002
	398.776	271.335	990.892	484.508
	397.547	276.224	1010.06	482.578
	396.318	269.15	1022.69	506.95
	395.089	260.628	1030.16	521.448
	393.86	275.332	1026.24	501.06
	392.631	266.984	1031.98	514.956
	391.403	247.668	1044.3	524.053
	390.174	243.427	1044.71	554.477
	388.945	269.69	1027.43	547.681
	387.716	277.871	1053.8	536.884
	386.487	256.715	1013.79	568.121
	385.259	265.68	1069.48	535.558
	384.03	291.813	1087.27	563.2
	382.801	252.98	1109.67	547.163
	381.572	252.337	1097.09	494.179
	380.343	294.298	1031.69	506.254
	379.115	289.664	1022.97	512.581
	377.886	271.151	1043.19	516.245
	376.657	282.187	1008.23	487.061
	375.428	284.399	980.075	481.52
	374.199	270.56	985.898	512.766
	372.971	261.926	980.129	511.408
	371.742	253.387	990.058	493.959
	370.513	257.893	1005.66	496.558
	369.284	238.542	976.661	498.433
	368.055	271.237	963.759	507.61
	366.826	316.05	900.315	504.132
	365.598	264.1	925.189	471.827
	364.369	277.407	934.186	483.614
	363.14	257.138	941.303	477.956
	361.911	288.73	907.106	504.253
	360.682	308.713	874.24	460.445
	359.454	295.97	887.378	456.432
	358.225	297.138	888.467	475.993
	356.996	296.752	918.883	464.232
	355.767	288.756	953.485	467.123
	354.538	287.351	916.594	478.075
	353.31	301.72	863.737	470.158
	352.081	315.924	884.404	475.972
	350.852	295.7	900.376	472.976
	349.623	285.944	857.477	490.553
	348.394	263.566	870.877	464.948
	347.165	305.95	864.117	437.112
	345.937	295.22	871.061	474.372
	344.708	294.812	864.243	475.504
	343.479	299.541	904.829	494.557
	342.25	301.872	894.952	483.418
	341.021	300.897	845.227	479.026
	339.793	317.365	836.489	474.051
	338.564	301.649	816.589	466.858
	337.335	298.553	803.713	469.353
	336.106	289.84	832.706	473.167
	334.877	268.747	867.879	479.539
	333.649	284.076	883.651	491.884
	332.42	286.64	883.102	485.086
	331.191	285.243	838.988	483.414
	329.962	283.474	846.753	517.16
	328.733	318.453	834.285	524.584
	327.505	268.816	823.498	503.235
	326.276	263.956	835.074	450.983
	325.047	265.136	823.452	528.116
	323.818	277.055	820.821	507.609
	322.589	304.423	839.264	501.881
	321.36	321.744	851.818	498.056
	320.132	303.432	871.525	500.883
	318.903	277.578	848.935	489.798
	317.674	263.273	832.595	483.124
	316.445	267.763	851.509	501.475
	315.216	290.721	830.751	504.063
	313.988	294.183	811.641	489.283
	312.759	299.036	814.728	501.233
	311.53	307.529	914.27	510.961
	310.301	274.327	851.112	512.486
	309.072	281.302	840.399	496.568
	307.844	253.903	918.075	523.212
	306.615	281.096	871.47	587.542
	305.386	265.935	880.795	556.441
	304.157	261.924	859.221	570.597
	302.928	291.928	850.302	575.5
	301.7	303.973	898.011	588.803
	300.471	295.673	941.084	605.034
	299.242	287.644	942.007	617.201
	298.013	285.049	931.57	639.41
	296.784	301.792	921.667	629.516
	295.555	286.208	957.237	672.051
	294.327	311.329	1035.05	632.014
	293.098	266.052	1026.21	654.523
	291.869	293.997	1050.51	649.143
	290.64	304.112	1045.66	713.294
	289.411	295.048	1140.44	737.2
	288.183	293.479	1064.89	743.395
	286.954	284.376	1116.73	744.337
	285.725	264.002	1144.55	789.746
	284.496	265.282	1167.75	813.082
	283.267	286.508	1194.92	817.515
	282.039	283.448	1181.41	845.483
	280.81	260.017	1196.82	841.791
	279.581	269.595	1194.5	805.83
	278.352	266.888	1261.74	786.684
	277.123	292.082	1125.49	814.436
	275.895	259.007	1179.13	765.617
	274.666	271.014	1177.69	776.903
	273.437	249.719	1193.84	728.005
	272.208	249.92	1183.64	710.694
	270.979	265.501	1112.68	704.846
	269.75	288.936	1064.34	684.13
	268.522	288.211	1046.35	638.312
	267.293	268.845	1037.92	628.532
	266.064	262.483	1024.69	628.06
	264.835	275.759	1007.83	580.771
	263.606	283.159	1006.29	588.377
	262.378	240.353	952.078	554.58
	261.149	266.856	995.5	561.228
	259.92	235.65	976.262	564.576
	258.691	236.131	1018.71	531.249
	257.462	242.369	990.505	549.758
	256.234	243.744	923.516	541.275
	255.005	242.472	937.136	525.121
	253.776	249.296	941.863	527.752
	252.547	242.787	922.943	509.007
	251.318	242.898	922.027	479.451
	250.09	246.486	934.673	497.209
	248.861	227.757	922.346	546.922
	247.632	253.425	876.9	551.627
	246.403	258.827	884.915	521.717
	245.174	280.536	931.473	516.057
	243.945	270.153	902.027	490.137
	242.717	283.819	898.241	491.479
	241.488	283.269	889.087	515.125
	240.259	244.68	913.682	515.236
	239.03	222.357	938.096	526.054
	237.801	252.547	902.046	511.713
	236.573	250.175	892.075	499.942
	235.344	232.536	919.182	502.507
	234.115	262.554	904.422	501.279
	232.886	255.007	912.563	530.821
	231.657	278.13	961.201	534.038
	230.429	212.217	969.498	547.179
	229.2	239.563	940.199	550.491
	227.971	263.628	946.877	548.897
	226.742	268.293	931.562	588.51
	225.513	259.349	940.377	622.659
	224.284	259.024	957.289	653.319
	223.056	254.972	960.999	682.927
	221.827	254.1	964.248	746.939
	220.598	264.689	988.616	839.541
	219.369	280.481	1020.76	896.361
	218.14	288.861	1024.58	903.946
	216.912	258.015	1011.47	927.24
	215.683	239.822	1026.25	882.768
	214.454	273.876	1072.08	838.252
	213.225	283.608	1056.36	771.167
	211.996	262.901	1040.34	676.689
	210.768	268.501	1001.39	712.972
	209.539	239.238	1004.32	684.947
	208.31	250.981	994.03	616.701
	207.081	278.355	985.153	571.04
	205.852	255.369	958.835	540.993
	204.624	230.842	890.711	523.5
	203.395	262.057	901.401	523.732
	202.166	260.396	896.753	489.414
	200.937	245.807	854.924	496.064
	199.708	303.419	888.667	499.354
	198.479	308.266	875.88	487.146
	197.251	299.879	874.007	441.58
	196.022	266.406	846.149	434.281
	194.793	252.665	842.043	470.886
	193.564	261.391	849.812	499.908
	192.335	263.11	856.25	499.443
	191.107	265.502	867.863	476.672
	189.878	287.891	866.272	444.4
	188.649	270.938	851.108	446.968
	187.42	236.53	875.606	435.812
	186.191	261.826	850.079	440.791
	184.963	272.689	894.944	468.144
	183.734	271.291	892.092	479.526
	182.505	276.727	871.238	465.061
	181.276	280.695	843.079	460.65
	180.047	279.526	843.336	477.722
	178.819	270.744	843.943	482.384
	177.59	269.87	839.04	462.201
	176.361	281.755	862.118	452.572
	175.132	259.219	830.696	455.13
	173.903	261.309	757.398	412.216
	172.674	271.34	842.967	442.387
	171.446	284.559	883.499	432.429
	170.217	282.161	845.933	439.225
	168.988	275.803	852.309	416.328
	167.759	276.694	857.597	404.576
	166.53	281.666	820.986	434.969
	165.302	275.337	813.773	455.551
	164.073	266.82	855.281	449.396
	162.844	280.155	850.314	456.332
	161.615	285.585	823.118	420.593
	160.386	246.267	873.383	431.406
	159.158	267.956	889.923	422.953
	157.929	283.367	821.837	461.515
	156.7	278.831	809.467	450.222
	155.471	275.305	825.155	439.404
	154.242	271.484	843.55	428.446
	153.014	278.639	854.829	425.475
	151.785	294.133	846.66	418.094
	150.556	295.275	834.359	401.795
	149.327	274.935	862.059	411.519
	148.098	261.62	897.983	429.96
	146.869	263.231	857.801	421.537

## Sheet: Figure S-12
	FIGURE S-12 RAMAN DATA
	Raman shift cm-1	Count								x0 = 2311.53711
	2311.54	799.182	980.815	404.781	768.045	505.976	441.107	801.777		dx = -1.05902 (cm-1)
	2310.48	806.69	957.698	427.086	806.696	521.529	482.874	705.499
	2309.42	816.69	995.172	438.428	773.614	566.062	477.875	711.356
	2308.36	777.551	963.179	434.903	774.474	560.731	462.594	749.828
	2307.3	806.84	969.059	458.414	822.766	546.321	507.639	752.048
	2306.24	801.541	933.312	456.468	775.37	505.668	496.852	742.776
	2305.18	790.304	1002.81	444.801	754.437	545.26	478.869	795.464
	2304.12	823.919	1038.1	438.613	752.582	551.101	474.711	731.226
	2303.06	760.226	1001.18	472.12	823.547	553.28	475.141	769.524
	2302.01	766.157	1005.99	461.24	803.009	529.493	485.859	769.392
	2300.95	792.19	992.324	486.454	762.163	551.255	486.959	735.963
	2299.89	800.931	1019.2	423.773	713.52	556.054	448.525	722.301
	2298.83	826.071	1034.31	447.795	719.708	578.768	486.014	723.152
	2297.77	766.964	1036.9	456.304	796.362	581.514	485.963	734.864
	2296.71	784.016	1057.33	419.573	759.764	541.357	458.502	717.469
	2295.65	801.527	1033.76	441.234	792.5	525.184	495.996	706.186
	2294.59	798.952	1033.08	485.228	790.408	565.145	536.862	695.193
	2293.53	857.233	1078.26	438.024	808.42	538.37	514.071	710.594
	2292.47	866.945	1068.63	440.474	785.389	552.282	530.281	716.219
	2291.42	841.29	1009.67	459.083	773.127	578.655	471.992	675.781
	2290.36	862.017	1061.5	494.34	826.678	520.649	452.845	753.735
	2289.3	832.082	1075.24	505.242	850.564	549.417	552.836	719.668
	2288.24	820.414	1073.31	468.263	849.872	584.897	539.767	697.529
	2287.18	784.76	1049.55	447.082	810.927	567.11	507.355	714.712
	2286.12	813.531	1034.87	430.204	807.444	530.101	519.226	690.728
	2285.06	851.84	1069.91	447.242	826.679	529.643	502.998	732.953
	2284	859.287	1068.31	449.404	824.845	566.673	455.293	744.209
	2282.94	813.175	1073.9	451.271	808.044	564.899	476.258	719.406
	2281.88	800.959	1040.3	459.929	802.758	591.262	489.722	705.022
	2280.83	828.603	1011.87	491.068	833.225	552.312	494.843	704.044
	2279.77	867.87	1006.29	452.44	836.597	546.097	475.211	664.815
	2278.71	934.845	988.479	433.712	815.701	531.805	424.285	714.361
	2277.65	798.04	1029.74	409.18	816.022	548.739	479.028	685.811
	2276.59	809.383	1005.62	465.916	796.328	565.479	465.58	711.982
	2275.53	793.44	1015.79	460.85	795.895	528.69	447.337	703.866
	2274.47	778.011	1009.67	456.165	763.896	560.869	451.992	661.938
	2273.41	769.418	998.231	445.392	767.685	542.202	470.459	690.078
	2272.35	782.885	1015.92	438.044	777.25	549.722	478.539	691.164
	2271.29	789.83	1002.17	457.139	783.173	533.825	467.896	715.211
	2270.24	813.132	979.122	498.094	784.854	516.978	472.447	746.698
	2269.18	754.875	987.361	443.782	737.926	565.141	486.239	709.27
	2268.12	782.563	979.516	445.77	765.098	533.126	422.63	705.055
	2267.06	744.725	1021.2	377.108	802.572	532.776	477.675	720.225
	2266	788.505	996.915	432.827	759.504	508.91	421.089	671.313
	2264.94	796.903	971.884	465.42	790.07	527.6	466.729	705.822
	2263.88	777.59	964.24	438.666	762.804	503.635	436.772	673.719
	2262.82	778.716	982.321	423.938	764.094	527.792	456.305	661.414
	2261.76	800.989	1002.96	411.674	765.203	549.874	464.723	681.831
	2260.7	820.552	1028.65	451.632	731.94	528.229	474.99	703.429
	2259.65	830.917	958.691	436.646	743.455	533.84	466.492	689.143
	2258.59	818.393	1009.45	410.745	763.364	554.121	457.752	658.036
	2257.53	799.902	994.759	412.091	803.684	541.996	506.523	660.236
	2256.47	780.71	999.466	458.676	771.68	527.969	473.964	714.35
	2255.41	808.083	979.503	405.446	735.74	553.865	465.035	711.526
	2254.35	826.88	954.959	435.67	802.798	497.042	449.712	660.004
	2253.29	780.553	1000.21	420.706	779.206	482.239	457.375	736.786
	2252.23	787.114	1022.27	430.372	755.941	527.455	465.623	717.864
	2251.17	767.681	957.699	412.737	766.216	535.354	447.495	696.204
	2250.11	788.347	1002.7	388.983	777.049	533.726	467.003	690.017
	2249.05	782.619	1045.2	403.383	745.967	532.078	449.068	690.044
	2248	762.133	1014.83	416.91	727.133	524.265	471.449	704.848
	2246.94	791.365	980.897	409.462	781.07	523.108	455.913	681.341
	2245.88	768.719	1008.96	418.609	782.146	548.086	469.211	697.087
	2244.82	764.437	995.598	441.829	799.905	538.82	455.922	702.792
	2243.76	780.57	904.549	403.572	719.992	509.792	455.854	707.27
	2242.7	771.35	1001.95	432.978	732.875	530.198	486.897	727.193
	2241.64	765.429	989.514	415.56	721.87	490.568	481.478	715.219
	2240.58	795.155	1015.55	447.102	747.107	544.802	479.056	709.402
	2239.52	828.351	1007.07	452.68	769.251	518.653	484.326	689.942
	2238.46	784.002	1030.03	444.496	737.314	552.049	502.903	708.333
	2237.41	812.759	986.669	442.617	733.744	541.328	480.83	706.639
	2236.35	789.987	976.131	479.374	756.846	553.226	453.393	684.925
	2235.29	754.489	995.581	450.997	762.683	553.844	461.702	701.104
	2234.23	785.479	957.077	438.047	794.09	547.588	499.014	737.721
	2233.17	806.638	978.72	439.863	814.911	533.755	505.016	752.811
	2232.11	834.386	978.999	391.692	761.547	496.83	477.398	678.545
	2231.05	812.549	976.901	405.082	708.891	557.842	489.815	652.409
	2229.99	839.774	952.411	406.673	786.554	476.296	470.684	663.969
	2228.93	894.717	1028.67	416.429	741.853	517.915	481.358	681.843
	2227.87	834.381	1075.3	442.169	808.798	536.736	473.076	641.387
	2226.82	861.767	1042.88	459.668	771.273	548.81	501.757	640.971
	2225.76	830.431	1042.65	431.256	760.975	532.81	466.921	704.115
	2224.7	815.546	1016.27	421.488	817.07	557.212	465.293	710.362
	2223.64	795.671	1002.02	456.179	833.237	555.494	491.362	693.632
	2222.58	777.558	973.501	445.621	811.402	564.197	489.108	700.083
	2221.52	784.84	903.056	418.561	793.723	552.088	457.411	707.139
	2220.46	792.49	909.513	417.338	808.622	539.804	429.378	698.72
	2219.4	810.291	953.242	399.302	754.713	512.838	462.445	680.688
	2218.34	806.876	968.679	444.588	737.776	521.761	460.099	658.765
	2217.28	750.131	1027.84	420.981	709.233	510.217	471.877	719.487
	2216.23	794.15	935.997	461.426	762.167	544.998	470.061	718.624
	2215.17	771.967	941.824	446.565	728.325	535.08	474.175	688.149
	2214.11	759.465	965.407	387.726	743.434	539.481	443.122	672.886
	2213.05	787.817	960.657	429.107	759.011	559.953	449.498	710.989
	2211.99	813.469	1013.23	452.667	772.02	555.065	502.44	684.347
	2210.93	830.885	1021.6	417.481	796.884	578.282	515.397	692.454
	2209.87	827.908	1022.65	435.623	833.027	606.005	504.96	730.496
	2208.81	841.325	1052.04	440.227	844.505	614.94	483.525	677.629
	2207.75	902.523	1094.97	450.715	840.324	606.785	474.001	646.79
	2206.69	856.544	1080.73	444.677	812.975	616.985	492.234	716.551
	2205.64	864.376	1089.69	404.911	815.444	583.423	491.933	677.94
	2204.58	829.209	1031.44	418.872	797.622	659.784	459.796	669.318
	2203.52	850.057	1025.63	480.229	819.997	548.076	515.581	673.955
	2202.46	859.441	1032.33	455.372	840.892	583.26	485.846	714.254
	2201.4	882.091	1039.5	448.861	816.629	561.233	523.081	691.799
	2200.34	892.248	1069.83	427.48	848.617	543.229	499.169	693.618
	2199.28	860.2	1029.92	436.363	844.147	560.983	495.694	679.52
	2198.22	866.088	1068.67	438.604	847.827	554.469	484.942	707.634
	2197.16	856.98	1048.29	467.911	798.906	551.89	487.108	706.731
	2196.1	846.38	1079.27	447.662	773.022	559.465	477.601	719.809
	2195.04	839.872	1038.16	440.423	762.222	571.097	508.043	709.919
	2193.99	830.592	1037.9	452.17	782.08	559.146	524.349	713.075
	2192.93	826.405	1037.28	424.911	770.723	550.122	473.35	639.143
	2191.87	822.987	1035.6	420.815	775.281	546.23	505.879	665.434
	2190.81	803.314	1016.55	440.581	803.172	581.753	476.827	701.075
	2189.75	782.386	1015.23	459.238	758.323	523.554	464.823	719.218
	2188.69	818.616	1013.12	449.304	744.893	550.158	484.524	686.105
	2187.63	854.094	1004.86	415.908	869.616	490.823	502.686	698.58
	2186.57	835.842	1041.65	394.274	803.824	573.543	478.799	672.025
	2185.51	831.841	999.224	472.32	757.732	545.141	478.397	706.244
	2184.45	831.68	1007.99	423.375	743.479	558.19	487.738	688.947
	2183.4	820.88	1011.01	417.426	741.437	591.68	494.519	680.092
	2182.34	808.546	1005.49	444.32	775.498	562.53	461.603	670.957
	2181.28	836.377	1004.9	433.741	800.212	498.305	490.292	657.252
	2180.22	820.816	1045.98	399.435	813.741	555.981	477.538	687.483
	2179.16	782.468	1018.38	415.807	786.129	558.847	471.352	690.619
	2178.1	770.776	1000.83	427.597	760.229	545.369	507.783	707.42
	2177.04	801.85	995.628	388.996	839.585	539.836	420.114	648.963
	2175.98	770.404	955.327	436.823	741.623	524.389	469.569	742.127
	2174.92	815.797	988.176	448.147	744.039	568.514	466.245	675.858
	2173.86	872.311	1005.37	449.543	786.812	506.307	477.31	693.432
	2172.81	824.053	990.379	444.252	770.559	541.555	482.962	635.779
	2171.75	798.723	990.755	446.276	788.082	532.58	470.448	648.135
	2170.69	803.511	998.961	440.98	795.051	549.802	486.355	662.356
	2169.63	824.003	1009.56	434.083	802.643	586.866	481.323	688.765
	2168.57	837.958	1038.53	419.164	797.927	587.186	498.487	720.199
	2167.51	852.863	1012.88	430.858	775.904	561.547	510.093	698.506
	2166.45	846.119	994.878	443.751	777.351	559.746	504.677	680.228
	2165.39	799.711	1012.41	455.786	813.758	558.237	477.978	689.005
	2164.33	835.014	1000.1	439.973	820.337	550.023	495.467	685.744
	2163.27	821.803	992.642	430.24	784.768	564.897	471.142	705.462
	2162.22	831.607	1001.55	408.824	734.562	563.646	503.344	681.999
	2161.16	803.785	1048.92	408.948	741.93	592.446	487.885	641.011
	2160.1	811.225	1006.3	456.503	804.358	498.908	531.834	681.394
	2159.04	779.743	1038.81	450.582	783.497	537.305	459.489	723.227
	2157.98	835.814	997.645	468.564	795.463	536.74	516.531	699.646
	2156.92	822.974	1025.71	420.487	812.331	546.807	495.657	691.004
	2155.86	844.34	984.138	454.572	813.412	555.586	506.611	667.833
	2154.8	809.291	973.234	436.662	786.9	548.876	505.651	666.873
	2153.74	775.357	1027.44	469.669	736.951	536.071	529.744	692.803
	2152.68	823.093	1053.88	464.905	708.673	562.753	508.542	679.777
	2151.63	810.076	1030.25	424.039	767.549	578.659	498.878	694.872
	2150.57	821.514	1021.64	429.072	780.792	541.684	454.549	716.307
	2149.51	804.033	1009.89	427.895	810.241	517.894	450.12	689.073
	2148.45	792.414	975.797	415.772	804.366	566.067	488.26	657.99
	2147.39	771.759	980.039	417.345	778.952	559.844	459.481	693.365
	2146.33	754.067	1037.72	476.006	812.676	561.12	492.693	684.709
	2145.27	862.281	1004.91	453.46	765.882	563.896	573.129	675.365
	2144.21	793.001	1021.09	415.31	793.192	564.553	487.018	660.889
	2143.15	789.428	1005.4	413.703	754.352	531.981	510.784	680.838
	2142.09	751.964	992.133	400.221	759.645	542.422	511.938	680.464
	2141.03	781.153	983.666	401.955	815.142	622.497	454.801	674.006
	2139.98	825.694	1014.38	415.283	831.868	575.399	503.572	669.747
	2138.92	854.44	1013.97	384.448	786.107	558.46	506.835	684.366
	2137.86	834.949	1028.68	415.691	802.41	533.709	496.142	681.561
	2136.8	864.246	1050.7	439.117	794.813	529.542	487.318	679.715
	2135.74	852.614	991.023	439.986	756.355	567.109	501.093	667.554
	2134.68	815.192	989.174	423.928	753.607	582.936	533.013	716.735
	2133.62	841.555	1005.32	429.133	788.059	586.368	517.081	680.345
	2132.56	863.645	1040.85	430.076	826.373	552.918	515.098	672.516
	2131.5	824.488	1014.5	441.978	829.531	582.202	496.369	720.404
	2130.44	852.018	1006.8	426.379	751.961	572.001	510.118	690.236
	2129.39	846.349	960.814	460.378	798.457	562.593	504.858	665.378
	2128.33	771.895	957.149	455.196	760.629	500.725	482.397	661.117
	2127.27	825.791	995.092	391.758	770.222	554.547	503.277	635.292
	2126.21	781.213	990.942	418.1	788.532	557.815	482.345	676.957
	2125.15	811.468	1030.22	405.209	752.11	568.388	451.284	635.904
	2124.09	811.226	1018.86	426.774	779.105	548.352	525.918	672.497
	2123.03	834.819	1028.92	436.42	819.799	547.126	491.315	680.362
	2121.97	830.688	1024.38	450.29	803.679	514.788	481.257	668.872
	2120.91	851.798	1010.99	418.001	806.091	539.492	506.087	662.827
	2119.85	810.706	1041.57	445.064	765.274	546.389	507.386	673.858
	2118.8	776.886	991.346	456.625	772.465	570.399	494.407	690.487
	2117.74	813.457	975.173	421.505	787.052	543.524	500.472	635.236
	2116.68	808.231	985.718	408.961	778.877	507.987	487.213	655.3
	2115.62	773.235	949.521	429.244	797.91	559.671	455.234	670.186
	2114.56	803.265	944.999	448.004	801.544	572.099	472.924	687.487
	2113.5	793.215	957.22	459.412	800.953	521.865	460.318	700.364
	2112.44	878.34	972.654	401.304	774.771	532.078	455.591	638.101
	2111.38	840.265	968.807	462.823	817.928	517.868	477.885	613.936
	2110.32	782.083	1044.36	451.501	789.222	511.791	475.657	679.892
	2109.26	836.29	990.729	396.104	874.118	539.913	448.938	653.958
	2108.21	803.973	992.726	396.221	830.992	588.279	471.861	677.041
	2107.15	794.851	990.093	434.03	767.292	581.241	466.06	661.714
	2106.09	795.5	989.887	413.512	784.553	587.925	495.439	651.655
	2105.03	769.986	1008.95	445.746	761.048	588.48	504.127	674.285
	2103.97	817.703	1010.9	462.985	804.585	574.041	503.031	672.997
	2102.91	809.96	1002.1	464.353	823.117	562.42	497.134	667.581
	2101.85	820.851	999.431	420.676	806.308	565.192	490.347	654.464
	2100.79	792.626	1039.46	425.774	791.378	563.977	503.733	665.904
	2099.73	807.825	998.507	430.528	847.216	560.023	518.449	654.594
	2098.67	814.262	975.946	426.132	847.201	543.943	520.989	686.711
	2097.62	809.957	1019.1	440.167	810.044	544.241	485.265	678.136
	2096.56	790.416	1010	446.215	803.48	560.851	443.278	707.164
	2095.5	807.825	1007.6	431.195	739.634	570.414	462.945	671.359
	2094.44	827.021	984.324	391.614	747.202	592.242	471.114	689.415
	2093.38	818.055	952.873	445.965	847.154	536.608	434.21	639.037
	2092.32	811.452	1040.9	459.943	768.051	544.416	517.386	655.25
	2091.26	824.694	978.074	397.761	817.137	562.22	492.269	643.846
	2090.2	768.924	1054	474.639	804.901	568.037	473.411	667.707
	2089.14	814.38	970.568	388.68	776.881	551.53	448.69	627.211
	2088.08	778.92	971.669	421.276	818.326	574.159	515.507	651.693
	2087.02	815.275	999.91	400.013	799.86	526.496	553.724	689.445
	2085.97	800.169	974.366	436.719	760.987	538.979	527.237	674.024
	2084.91	785.284	992.889	442.912	756.806	574.881	473.257	670.989
	2083.85	809.286	1007.22	431.801	770.491	564.086	487.872	665.76
	2082.79	793.779	991.773	421.534	766.17	543.285	511.861	669.947
	2081.73	803.315	1005.39	429.534	776.439	542.013	518.617	678.717
	2080.67	819.254	1024.9	411.206	791.119	530.252	504.414	691.085
	2079.61	833.971	971.743	380.713	779.458	557.631	501.773	653.892
	2078.55	849.529	993.049	443.73	790.544	566.362	491.041	702.78
	2077.49	826.603	1009.12	402.235	805.857	558.398	454.988	720.571
	2076.43	826.922	1039.64	431.05	790.729	567.707	510.161	634.523
	2075.38	907.962	988.99	428.317	801.722	628.82	494.301	680.255
	2074.32	880.651	1027.76	446.84	797.885	573.172	492.076	661.432
	2073.26	839.976	943.393	405.463	738.932	606.912	471.848	612.559
	2072.2	845.437	1097.41	419.593	775.291	540.316	464.616	643.775
	2071.14	843.994	1048.85	387.147	777.431	586.629	492.973	685.933
	2070.08	779.777	977.77	389.442	780.45	603.669	494.659	695.113
	2069.02	823.523	1012.7	408.505	783.441	585.243	537.183	722.13
	2067.96	867.375	1019.89	428.066	762.111	564.927	522.361	710.924
	2066.9	821.809	981.729	488.132	789.934	580.765	509.479	707.187
	2065.84	833.061	959.902	470.086	766.897	560.382	487.461	702.805
	2064.79	819.499	993.369	453.017	789.727	550.268	497.674	672.715
	2063.73	848.506	1026.55	464.032	840.651	568.212	497.725	660.487
	2062.67	847.642	1012.98	436.378	846.403	553.97	485.562	705.063
	2061.61	851.039	1025.41	402.465	806.848	540.195	494.891	712.959
	2060.55	836.708	1037.7	400.337	767.484	558.428	491.041	665.722
	2059.49	842.33	1004.59	430.501	758.444	565.689	488.279	656.419
	2058.43	864.048	1019.44	430.077	806.074	569.879	499.211	643.378
	2057.37	846.156	973.402	404.618	824.529	603.653	495.128	644.026
	2056.31	816.85	973.233	409.233	777	586.87	507.529	683.482
	2055.25	821.164	931.739	408.925	780.991	540.151	459.513	644.955
	2054.2	819.775	1021.39	424.842	805.721	539.508	490.331	614.314
	2053.14	826.799	985.88	442.934	780.204	547.041	529.33	618.928
	2052.08	780.083	1058.87	442.982	795.271	575.24	483.032	639.377
	2051.02	854.598	1040.8	438.206	805.82	595.294	490.805	674.59
	2049.96	831.427	1006.01	415.818	729.745	534.392	477.483	695.046
	2048.9	812.853	1020.9	424.016	824.926	566.954	504.712	665.558
	2047.84	864.33	984.397	399.671	824.304	562.691	488.489	672.504
	2046.78	825.946	1030.34	448.88	831.672	529.98	516.229	658.09
	2045.72	833.755	1027.34	439.047	805.047	528.11	518.109	655.172
	2044.66	843.964	997.754	435.033	805.972	589.236	489.975	647.184
	2043.61	824.667	1015.53	410.459	777.931	579.38	500.265	678.623
	2042.55	823.247	1073.62	430.172	796.131	564.532	497.042	678.895
	2041.49	840.072	1072.78	433.373	809.74	572.042	495.41	668.726
	2040.43	832.399	1015.45	419.633	775.321	601.343	514.06	677.169
	2039.37	846.189	1027.48	406.94	774.469	590.095	511.136	637.44
	2038.31	842.512	1013.29	416.005	789.709	562.362	523.641	638.716
	2037.25	837.075	1010.29	438.319	769.947	527.06	521.983	620.601
	2036.19	831.876	1033.32	444.271	768.684	527.986	570.622	672.901
	2035.13	846.569	1044.71	415.151	758.841	567.866	547.196	641.051
	2034.07	812.248	1009.21	431.691	781.62	546.585	523.09	732.587
	2033.01	819.287	982.061	382.606	812.822	587.75	516.166	689.167
	2031.96	803.11	1001.82	454.345	818.613	548.965	510.914	650.747
	2030.9	801.391	1044.05	368.277	792.469	547.326	512.805	602.662
	2029.84	806.19	1045.51	448.472	791.398	586.612	478.096	638.341
	2028.78	809.263	1068.19	423.058	792.258	568.866	459.26	639.816
	2027.72	824.074	1032.54	449.546	767.152	559.901	519.207	674.341
	2026.66	826.586	968.59	430.929	766.067	565.972	532.254	647.365
	2025.6	792.864	993.795	400.448	720.244	582.371	523.248	655.278
	2024.54	809.989	979.505	415.921	742.053	595.474	530.199	607.352
	2023.48	817.628	1024.88	451.509	800.789	552.273	466.75	607.048
	2022.42	855.709	1018.52	461.177	789.083	555.505	481.041	669.268
	2021.37	826.435	991.245	448.769	772.776	558.782	498.498	693.436
	2020.31	827.84	996.059	420.372	801.208	550.832	501.03	685.873
	2019.25	865.283	1065.25	412.594	823.162	561.682	532.515	652.948
	2018.19	862.654	1030.42	428.628	786.07	611.872	522.355	638.004
	2017.13	836.842	990.638	410.049	780.773	624.265	482.642	666.41
	2016.07	835.013	1002.5	419.853	818.984	627.371	497.624	634.76
	2015.01	847.856	1036.87	423.43	802.823	597.893	502.332	656.355
	2013.95	826.622	996.137	387.193	770.315	598.342	526.8	651.929
	2012.89	830.519	1007.43	402.268	779.49	647.643	494.732	655.264
	2011.83	881.171	1021.13	414.641	837.909	609.49	497.019	687.5
	2010.78	847.342	1010.11	443.738	779.512	591.561	504.223	669.27
	2009.72	802.782	1051.08	420.035	748.599	562.05	503.572	699.866
	2008.66	806.218	1042.12	410.509	782.249	571.819	505.572	623.76
	2007.6	796.886	1036.49	401.289	764.068	622.895	470.706	687.159
	2006.54	859.699	1045.21	413.944	802.377	589.476	494.001	648.404
	2005.48	852.064	1009.8	419.604	776.424	541.237	457.587	627.134
	2004.42	808.391	1013.62	397.743	773.047	576.083	498.785	696.967
	2003.36	875.042	1016.96	413.013	778.235	535.045	539.283	664.843
	2002.3	862.444	996.243	468.309	865.901	573.296	523.356	611.319
	2001.24	885.746	1024.38	437.649	789.348	503.238	464.419	650.325
	2000.19	794.607	1013.68	411.148	776.234	581.338	503.957	644.706
	1999.13	819.408	928.488	400.875	792.865	619.397	510.482	675.521
	1998.07	825.427	1006.19	398.673	743.324	579.722	497.811	682.307
	1997.01	834.696	1037.75	447.824	751.014	574.211	476.492	682.741
	1995.95	819.439	1053.38	409.216	771.949	560.06	519.914	666.846
	1994.89	810.448	1005.22	412.675	803.721	593.216	495.292	649.595
	1993.83	846.462	993.48	410.063	788.677	583.555	499.703	653.685
	1992.77	865.514	1008.67	411.675	800.895	557.791	493.316	701.726
	1991.71	856.931	1020.5	414.746	779.791	615.818	485.349	693.911
	1990.65	860.071	1031.89	426.567	787.18	623.957	512.4	642.25
	1989.6	836.847	1012.78	423.071	776.933	605.431	521.444	652.567
	1988.54	854.465	977.427	393.582	750.659	613.42	499.217	674.002
	1987.48	859.478	985.211	391.469	735.282	619.941	500.638	620.01
	1986.42	856.94	1047.81	425.101	750.68	581.976	511.105	662.819
	1985.36	878.797	1071.99	402.006	803	582.861	507.58	720.331
	1984.3	821.751	1071.04	431.992	826.96	600.664	473.456	611.056
	1983.24	838.136	1005.41	431.156	770.852	643.125	505.064	592.01
	1982.18	791.987	994.854	435.095	780.235	619.899	488.879	620.738
	1981.12	826.11	1007.31	427.261	803.253	586.501	491.647	636.942
	1980.06	837.781	966.662	420.911	778.724	611.274	512.691	681.682
	1979	848.985	1050.65	446.696	794.302	624.465	469.086	651.87
	1977.95	799.549	993.554	417.32	796.26	588.596	480.129	682.789
	1976.89	862.684	1041.34	446.059	786.599	536.162	473.952	631.72
	1975.83	798.38	999.14	446.75	780.984	528.035	490.699	641.199
	1974.77	797.118	1059.47	439.303	743.212	603.789	485.258	653.377
	1973.71	830.538	1003.12	440.587	770.85	563.455	526.845	673.6
	1972.65	865.26	1003.72	478.162	788.069	531.651	493.719	660.571
	1971.59	832.987	1013.2	416.847	743.128	551.041	498.75	626.809
	1970.53	822.305	1033.11	415.968	825.364	556.6	490.297	628.217
	1969.47	878.888	1034.35	421.407	758.876	527.404	493.77	639.222
	1968.41	867.04	1022.1	424.115	763.396	547.721	502.464	649.738
	1967.36	849.06	1031.19	433.469	792.702	574.676	494.942	695.145
	1966.3	864.901	1011.54	413.997	770.791	562.312	508.308	682.826
	1965.24	880.229	1032.9	411.222	767.449	542.719	505.485	643.993
	1964.18	832.492	1039.14	418.852	741.664	565.165	523.568	635.526
	1963.12	821.091	975.364	416.705	777.048	599.364	506.095	658.666
	1962.06	831.044	1015.01	427.795	813.312	619.079	511.534	641.725
	1961	822.605	1043.16	407.143	790.159	609.892	540.76	613.493
	1959.94	847.249	983.644	419.957	809.535	592.844	508.887	639.691
	1958.88	847.374	1001.67	444.466	808.163	581.047	495.028	650.547
	1957.82	840.541	1043.32	425.967	820.3	592.714	508.657	629.145
	1956.77	836.709	1003.11	400.154	779.347	594.917	528.726	669.78
	1955.71	796.273	1014.04	422.905	711.124	567.22	501.622	656.818
	1954.65	850.498	1038.63	421.225	741.567	541.153	516.411	641.348
	1953.59	838.636	1010.22	447.511	786.748	529.274	540.777	652.635
	1952.53	778.119	1062.82	450.536	803.765	522.427	517.936	631.51
	1951.47	831.952	1087.29	426.82	790.847	552.738	573.084	620.31
	1950.41	836.804	1011.45	444.866	786.946	580.768	537.353	619.768
	1949.35	831.095	992.949	420.815	765.914	568.114	496.654	624.469
	1948.29	816.799	1038.16	400.921	778.657	535.4	482.709	621.851
	1947.23	826.315	1038.62	423.46	794.735	562.994	501.874	615.529
	1946.18	864.901	1058.66	420.979	820.373	551.05	548.357	573.438
	1945.12	862.635	965.31	379.97	832.1	544.332	538.044	617.085
	1944.06	900.88	968.032	380.9	818.974	555.303	529.664	623.419
	1943	832.066	1044.16	428.37	773.109	581.866	505.527	644.718
	1941.94	876.079	1101.73	439.263	827.633	604.206	555.714	642.826
	1940.88	863.743	1070.06	437.12	847.53	570.143	538.599	658.131
	1939.82	860.659	1063.05	445.262	792.007	569.809	534.016	671.542
	1938.76	851.569	960.272	387.465	809.508	604.165	498.418	648.878
	1937.7	851.451	1029.79	386.723	794.538	600.284	487.465	649.082
	1936.64	838.457	988.446	432.32	745.335	553.151	505.396	642.432
	1935.59	861.802	1015.32	416.971	842.394	562.385	502.191	650.867
	1934.53	841.112	1029.91	390.77	831.456	600.06	519.48	647.499
	1933.47	837.575	1030.61	392.471	764.101	605.281	489.692	638.936
	1932.41	858.9	990.544	424.025	769.923	597.904	512.474	624.197
	1931.35	845.865	1048.94	416.644	769.162	574.116	496.814	621.415
	1930.29	821.021	1012.95	416.565	796.163	569.061	503.883	652.479
	1929.23	801.301	1044.3	418.052	775.201	582.589	512.1	660.109
	1928.17	780.462	1008.31	411.959	778.311	551.705	462.921	661.498
	1927.11	839.935	993.914	389.097	757.944	569.124	503.462	616.466
	1926.05	881.877	968.037	380.92	791.358	570.172	486.921	613.66
	1924.99	857.5	995.912	396.702	745.72	587.243	485.068	665.635
	1923.94	844.417	968.268	429.163	764.707	591.607	507.187	627.181
	1922.88	858.742	1002.05	415.219	792.165	586.725	535.657	607.339
	1921.82	831.881	1039.93	420.636	795.502	569.548	488.576	630.514
	1920.76	865.874	1012.84	440.411	754.909	583.921	489.514	672.914
	1919.7	876.999	1002.75	408.488	754.847	595.947	515.124	657.744
	1918.64	867.307	992.667	393.615	803.11	573.864	510.326	619.107
	1917.58	891.008	985.454	408.699	815.642	586.992	503.601	611.335
	1916.52	875.202	993.765	435.319	827.764	592.621	499.539	650.29
	1915.46	877.653	1034.11	436.715	791.357	600.917	517.738	621.075
	1914.4	875.917	1065.81	440.323	765.6	584.536	500.024	626.671
	1913.35	865.95	1053.84	447.613	771.324	545.714	508.578	614.417
	1912.29	860.855	1005.97	440.48	769.818	569.48	508.78	620.015
	1911.23	839.865	1019.65	431.588	767.567	587.655	513.299	643.659
	1910.17	861.722	988.582	427.743	780.172	574.271	514.621	606.04
	1909.11	850.43	1019.73	419.579	752.331	627.487	512.06	627.691
	1908.05	826.987	990.098	419.269	754.576	576.65	499.861	656.138
	1906.99	875.89	1080.15	427.59	840.448	539.781	520.601	655.309
	1905.93	846.836	992.458	445.478	791.516	557.671	570.348	643.836
	1904.87	818.239	988.281	408.935	726.766	620.003	549.529	644.699
	1903.81	850.987	995.006	421.738	805.689	618.509	514.967	655.624
	1902.76	866.498	1017.19	426.363	817.032	588.64	521.851	664.676
	1901.7	849.63	1019.29	466.68	799.027	603.403	569.761	626.517
	1900.64	843.482	1021.38	405.906	779.198	606.997	493.529	653.417
	1899.58	868.679	998.038	427.874	840.892	651.245	521.574	616.725
	1898.52	850.378	1004.18	466.734	833.4	636.007	484.554	629.463
	1897.46	840.659	1042.89	435.956	796.956	587.373	546.39	649.498
	1896.4	883.991	1082.65	454.878	788.883	565.118	517.533	661.482
	1895.34	811.943	1057.34	448.97	763.098	542.816	515.999	627.988
	1894.28	829.917	1067.71	424.998	810.535	572.882	531.697	632.18
	1893.22	858.968	1025.87	407.941	771.178	638.307	496.68	617.446
	1892.17	857.801	1059.37	380.537	783.982	593.182	511.867	643.834
	1891.11	848.432	1037.92	466.307	782.277	580.59	543.323	643.934
	1890.05	835.232	981.44	461.396	783.29	554.785	506.039	620.663
	1888.99	796.793	998.546	436.32	779.963	570.396	505.002	573.521
	1887.93	863.727	1004.96	396.524	839.211	602.826	536.003	616.151
	1886.87	807.887	1026.08	426.694	748.275	613.497	499.944	674.222
	1885.81	846.846	1050.62	447.489	777.356	580.301	500.476	660.777
	1884.75	871.342	1015.57	406.984	776.234	588.405	530.366	664.129
	1883.69	867.154	1053.27	434.76	816.693	559.058	500.219	671.347
	1882.63	889.632	1012.05	425.93	816.54	544.287	495.88	671.075
	1881.57	828.417	1045.44	458.288	810.243	599.295	520.012	652.04
	1880.52	835.707	1107.94	450.61	798.957	573.52	511.813	666.443
	1879.46	865.643	1117.7	434.361	824.131	585.291	493.998	675.134
	1878.4	846.371	1043.1	407.981	825.437	622.307	512.755	630.858
	1877.34	840.582	1037.61	404.038	762.154	589.996	499.294	666.523
	1876.28	804.296	1052.72	394.874	788.626	578.775	490.588	659.007
	1875.22	842.988	1044.53	428.548	811.386	576.547	506.851	644.533
	1874.16	842.641	1035.4	436.925	793.654	577.921	501.167	634.953
	1873.1	832.232	1073.65	420.03	783.79	570.849	510.274	609.633
	1872.04	819.878	1054.91	420.955	733.581	580.53	514.015	657.695
	1870.98	852.724	1011.68	416.127	751.487	590.333	491.781	654.349
	1869.93	869.831	1018.59	402.682	759.947	604.499	472.4	650.766
	1868.87	869.669	1011.26	431.362	783.951	623.996	513.516	643.47
	1867.81	877.725	995.475	427.591	767.123	583.619	519.135	641.32
	1866.75	888.526	1007.26	437.165	777.52	583.318	509.076	616.17
	1865.69	854.76	1009.76	442.8	799.053	608.449	530.5	673.407
	1864.63	858.111	1017.89	438.102	798.291	603.785	546.61	646.203
	1863.57	874.694	1060.83	443.257	798.1	592.293	528.899	665.228
	1862.51	878.953	1084.95	438.125	799.691	588.416	506.287	636.992
	1861.45	891.091	1040.25	426.56	771.292	572.471	511.365	669.287
	1860.39	885.691	1051.52	426.233	765.474	564.982	553.669	683.073
	1859.34	905.561	1064.31	435.314	769.176	608.53	568.267	657.116
	1858.28	882.531	1049.79	412.14	791.242	608.229	539.039	646.507
	1857.22	885.27	1021.16	403.477	840.445	586.059	525.995	607.146
	1856.16	855.426	1008.56	427.074	795.616	569.537	527.423	630.451
	1855.1	827.774	1014.08	463.825	783.363	603.667	517.297	639.9
	1854.04	817.276	1029.83	433.53	776.702	602.288	522.46	658.152
	1852.98	867.127	1009.46	409.315	792.707	591.723	503.805	677.374
	1851.92	950.758	1025.59	388.784	806.621	605.509	511.745	664.668
	1850.86	893.413	1008.86	424.749	775.539	608.051	535.64	670.821
	1849.8	874.161	1029.6	455.99	787.123	587.855	545.416	628.853
	1848.75	874.039	1039.82	438.368	811.149	576.679	538.09	665.705
	1847.69	855.472	1061.04	420.894	776.081	604.983	522.419	642.31
	1846.63	824.7	1079.79	399.86	766.609	581.943	558.73	717.349
	1845.57	861.036	1011.22	404.497	793.507	620.679	524.021	658.693
	1844.51	826.261	1084.29	386.047	847.146	584.057	522.717	664.67
	1843.45	834.992	1054.66	397.735	820.331	582.46	501.214	644.119
	1842.39	813.685	1057.95	419.877	829.021	584.758	508.621	692.925
	1841.33	830.533	1029.23	435.776	811.722	561.377	495.54	674.945
	1840.27	877.025	1087.45	377.193	803.805	559.265	529.454	642.942
	1839.21	851.649	1043.29	405	777.943	554.262	552.235	611.584
	1838.16	863.204	980.29	424.453	801.542	609.827	584.697	653.61
	1837.1	835.415	1009.42	450.317	773.866	617.85	537.182	673.73
	1836.04	849.018	1049.24	452.961	819.197	568.778	540.479	615.554
	1834.98	836.378	1040.84	424.097	810.533	618.514	500.395	638.155
	1833.92	853.883	1077.09	427.275	823.595	599.951	517.475	625.06
	1832.86	850.845	1035.61	376.777	867.507	553.776	521.375	657.384
	1831.8	879.003	1017.83	381.476	804.62	591.332	546.347	708.462
	1830.74	813.379	1045.69	423.189	784.327	641.588	513.918	672.725
	1829.68	868.001	1066.31	411.285	806.2	585.551	511.315	640.245
	1828.62	888.315	1087.44	424.185	774.543	603.809	520.049	622.819
	1827.56	863.616	1011.52	423.591	803.068	597.871	503.596	637.647
	1826.51	873.917	1034.01	436.353	775.698	594.719	512.653	641.192
	1825.45	877.161	1060.78	433.095	823.195	581.242	526.733	725.865
	1824.39	899.308	976.312	414.947	771.947	595.522	523.31	682.598
	1823.33	896.334	1047.64	395.742	818.899	592.111	480.581	649.341
	1822.27	848.825	1054.94	387.747	837.884	591.701	549.323	640.827
	1821.21	850.326	1054.89	430.174	786.741	607.399	542.286	611.395
	1820.15	882.213	1031.97	411.879	786.164	553.579	523.421	637.487
	1819.09	794.341	1046.75	413.159	724.399	592.146	522.498	654.927
	1818.03	862.014	1132.26	459.165	820.748	568.342	545.398	645.508
	1816.97	922.015	1058.48	435.129	784.487	585.921	506.715	686.082
	1815.92	869.934	1074.87	373.988	815.832	660.628	545.081	684.061
	1814.86	835.891	1061.06	395.964	802.373	606.053	520.141	672.241
	1813.8	910.431	1039.49	393.907	834.908	623.865	486.739	658.824
	1812.74	828.395	1060.33	405.61	811.472	574.376	557.125	661.574
	1811.68	830.169	1086.31	457.72	794.612	597.696	573.985	654.396
	1810.62	896.228	1041.23	419.943	775.643	632.994	547.846	701.815
	1809.56	855.759	1071.5	459.482	810.813	593.282	554.615	726.254
	1808.5	834.699	1047.87	403.095	801.387	651.056	530.677	670.026
	1807.44	854.64	1052.6	409.958	810.069	585.106	505.414	656.885
	1806.38	932.221	1066.93	405.174	779.841	566.966	538.63	668.228
	1805.33	865.512	1091.47	403.389	790.636	595.135	570.778	651.613
	1804.27	894.97	1059.53	429.415	859.177	614.316	560.831	639.45
	1803.21	878.758	1082.44	451.843	831.659	639.517	539.924	693.024
	1802.15	880.087	1084.29	434.827	770.635	571.12	538.413	689.228
	1801.09	854.999	1074.33	411.893	802.196	648.51	562.962	647.969
	1800.03	802.27	996.552	471.328	854.145	579.37	550.501	635.294
	1798.97	853.663	998.38	420.965	843.593	566.238	580.893	683.203
	1797.91	837.541	1042.34	414.725	812.503	579.727	550.698	713.524
	1796.85	836.014	1017.96	426.434	778.938	580.397	539.476	739.907
	1795.79	859.598	1032.93	390.168	746.564	597.816	586.88	698.17
	1794.74	963.052	1066.4	390.401	820.507	629.854	546.54	671.973
	1793.68	842.739	1109.16	436.204	816.886	601.193	551.048	663.227
	1792.62	859.622	1153.72	412.689	797.128	611.269	553.443	667.589
	1791.56	848.708	1111.46	395.497	844.757	592.237	558.2	651.79
	1790.5	934.26	1076.09	410.305	823.509	575.057	563.862	687.989
	1789.44	944.224	1015.03	435.015	874.696	588.054	548.022	700.577
	1788.38	888.556	1074.23	439.796	767.151	585.796	546.643	650.214
	1787.32	852.674	1025.74	445.437	794.448	621.894	560.212	673.846
	1786.26	816.625	1038.74	432.537	770.793	593.016	529.789	675.406
	1785.2	847.046	1070.23	471.657	786.907	563.021	543.585	712.128
	1784.15	839.392	1044.9	388.246	797.872	618.608	549.591	694.232
	1783.09	862.129	1066.69	407.984	795.956	618.81	506.157	685.197
	1782.03	873.773	1029.21	440.442	768.407	587.154	525.085	719.667
	1780.97	884.19	1069.86	427.962	791.644	581.848	545.658	712.693
	1779.91	874.857	1011.05	440.778	771.952	607.024	554.94	691.115
	1778.85	868.678	1036.25	396.079	744.726	617.249	522.913	694.955
	1777.79	844.343	1053.95	395.565	777.427	569.226	475.801	704.512
	1776.73	886.803	1094.76	424.852	806.15	624.994	549.676	663.661
	1775.67	853.078	1105.73	392.482	803.166	591.131	556.394	669.853
	1774.61	894.814	1023.96	415.123	792.774	663.316	560.637	674.867
	1773.55	921.79	1044.46	420.741	810.768	551.501	600.382	710.87
	1772.5	840.993	1012.44	399.636	812.877	600.091	588.335	744.174
	1771.44	892.37	1052.94	382.079	766.207	588.632	525.551	741.57
	1770.38	935.457	1103.02	394.031	783.163	634.596	532.497	708.093
	1769.32	891.163	1013.8	411.944	815.659	605.744	538.63	704.416
	1768.26	862.504	1047.89	410.525	840.9	621.053	526.375	696.962
	1767.2	887.089	1055.79	434.209	853.684	610.043	564.945	708.483
	1766.14	880.093	1027.69	398.438	833.915	623.595	565.416	705.726
	1765.08	880.416	1084.08	422.649	861.525	622.754	509.527	686.877
	1764.02	897.482	1062.46	391.065	788.081	596.93	560.38	688.529
	1762.96	849.885	1029.03	416.688	791.043	673.782	582.955	707.871
	1761.91	893.48	1092.68	437.297	832.64	611.156	566.776	705.38
	1760.85	889.018	1046.74	432.614	845.811	597.948	571.325	706.123
	1759.79	918.609	1095.08	434.72	794.729	669.534	573.282	717.12
	1758.73	855.421	1055.36	416.135	824.821	618.114	538.225	743.195
	1757.67	838.899	1113.61	483.857	787.263	627.352	554.491	715.756
	1756.61	866.671	1055.29	376.731	835.965	610.946	549.772	718.843
	1755.55	836.592	1036.09	394.366	838.515	603.75	547.316	714.4
	1754.49	877.548	1058.72	445.266	824.556	555.124	563.326	705.197
	1753.43	926.319	1013.08	414.01	844.791	540.367	519.942	696.248
	1752.37	861.132	1025.49	429.142	799.499	553.629	550.752	680.975
	1751.32	827.286	1089.23	395.49	791.22	565.27	515.273	702.751
	1750.26	886.849	1163.29	412.264	795.345	603.843	588.25	695.973
	1749.2	857.883	1083.23	428.623	802.107	585.182	537.509	712.73
	1748.14	840.67	1103.55	429.29	840.077	628.583	517.066	755.945
	1747.08	890.41	1056.15	413.765	817.731	622.09	566.743	693.582
	1746.02	884.68	1057.28	443.374	807.295	575.435	536.984	700.79
	1744.96	942.576	1096.51	432.425	810.873	635.097	554.118	725
	1743.9	923.301	1069.2	422.691	815.38	667.984	577.125	723.623
	1742.84	925.351	1077.08	424.005	766.384	646.755	540.371	729.72
	1741.78	872.499	1101.26	426.254	816.772	678.373	572.707	712.143
	1740.73	913.197	1082.41	439.036	809.693	662.802	567.909	738.763
	1739.67	926.567	1079.85	409.074	833.166	637.605	589.812	796.039
	1738.61	915.004	1087.93	413.438	840.222	622.258	575.964	767.03
	1737.55	927.542	1078.57	391.916	805.783	679.923	618.751	772.881
	1736.49	903.055	1101.25	431.214	818.912	639.612	537.868	716.613
	1735.43	930.939	1066.66	415.626	833.623	593.843	562.453	744.883
	1734.37	878.486	1085.96	401.951	819.576	633.097	544.84	745.078
	1733.31	921.141	1086.43	407.971	857.872	627.352	550.326	771.476
	1732.25	944.691	1137.99	426.897	818.899	632.397	571.544	735.368
	1731.19	966.521	1102.25	414.976	822.749	662.72	552.295	796.275
	1730.14	941.995	1145.29	419.181	903.39	665.021	585.211	780.394
	1729.08	890.169	1147.97	420.858	840.458	650.875	576.976	798.22
	1728.02	919.752	1108.38	470.838	805.692	621.58	606.101	764.414
	1726.96	972.369	1089.34	467.318	843.821	611.03	638.517	792.266
	1725.9	918.703	1110.13	446.415	829.959	649.69	617.837	760.862
	1724.84	901.292	1072.21	482.595	797.441	639.797	577.696	791.069
	1723.78	878.822	1091.6	430.167	821.203	661.177	595.77	782.908
	1722.72	912.755	1119.7	413.918	831.448	673.764	565.033	787.753
	1721.66	894.576	1081.1	425.898	826.17	642.385	561.334	796.379
	1720.6	880.822	1056.19	406.014	817.406	625.311	588.556	798.543
	1719.54	871.732	1057.71	433.241	808.029	641.453	584.323	803.093
	1718.49	874.697	1105.18	444.834	831.237	655.318	564.121	853.867
	1717.43	949.431	1137.51	432.131	840.751	624.379	576.9	847.425
	1716.37	928.72	1105.42	425.359	854.015	641.919	563.562	865.23
	1715.31	932.064	1113.24	412.152	869.98	646.951	555.902	846.544
	1714.25	881.537	1120.33	408.823	850.242	648.921	619.632	809.511
	1713.19	926.835	1186.88	434.208	831.113	637.973	605.202	866.133
	1712.13	948.768	1179.51	432.998	837.813	633.817	588.37	810.776
	1711.07	946.087	1131.42	417.066	866.614	670.599	604.359	848.778
	1710.01	933.558	1152.14	448.828	834.753	685.136	592.388	854.931
	1708.95	939.5	1159.24	453.819	812.05	677.612	580.161	915.761
	1707.9	944.755	1144.45	467.033	861.805	644.802	582.729	845.325
	1706.84	933.404	1153.02	464.572	848.648	628.405	612.044	880.597
	1705.78	922.767	1167.11	439.455	815.26	658.909	620.648	866.148
	1704.72	957.078	1179.81	440.508	876.837	662.461	601.308	882.132
	1703.66	957.801	1169.06	456.615	891.323	659.226	618.986	878.478
	1702.6	941.59	1159.12	470.183	849.429	682.049	618.847	909.074
	1701.54	930.103	1172.67	465.561	828.651	663.726	615.132	857.907
	1700.48	941.542	1190.66	461.552	824.279	642.808	595.196	877.49
	1699.42	972.131	1219.79	460.03	830.78	662.234	585.668	885.75
	1698.36	942.6	1215.7	480.278	822.504	689.789	617.299	902.677
	1697.31	934.178	1188.9	501.145	851.635	689.438	603.882	923.125
	1696.25	957.255	1189.74	480.273	884.405	628.28	603.684	941.805
	1695.19	995.426	1192.92	462.021	872.132	619.845	621.135	905.798
	1694.13	1009.07	1195.76	463.811	876.143	679.336	636.406	887.221
	1693.07	951.732	1180.97	490.203	872.544	675.739	630.289	999.101
	1692.01	941.198	1174.54	453.258	883.798	667.459	640.404	975.826
	1690.95	981.035	1178.53	439.025	908.865	689.845	621.104	942.794
	1689.89	985.631	1193.06	448.044	894.157	676.254	565.62	973.372
	1688.83	987.052	1176.86	452.438	889.981	666.251	629.74	958.481
	1687.77	1004.38	1184.77	443.081	873.352	707.367	634.733	937.966
	1686.72	977.962	1236.24	456.794	863.326	694.852	630.682	967.259
	1685.66	997.718	1239.06	481.542	940.119	670.735	630.059	1028.64
	1684.6	980.657	1219.19	486.572	891.6	687.764	625.658	968.857
	1683.54	996.94	1231.2	491.27	883.576	698.238	604.906	945.364
	1682.48	1018.27	1253.23	476.199	890.845	697.169	623.018	995.066
	1681.42	1033.36	1210.28	429.079	936.91	698.498	633.397	1000.71
	1680.36	989.652	1175.49	453.276	862.501	720.262	623.713	1023.99
	1679.3	1035.01	1222.52	468.475	893.255	713.491	668.867	1047.57
	1678.24	990.673	1286.2	458.705	880.274	697.293	656.421	1028.05
	1677.18	1081.77	1243.08	475.572	938.196	702.193	615.616	1055.3
	1676.13	1027.73	1261.9	491.959	933.116	752.751	626.304	1117.2
	1675.07	1066.5	1191.23	436.808	906.206	705.958	613.773	1120.11
	1674.01	1103.51	1224.97	479.123	912.078	697.851	638.791	1106.35
	1672.95	1044.72	1187.43	433.991	904.648	673.247	596.454	1101.67
	1671.89	1055.11	1293.3	401.448	887.738	717.108	689.242	1091.39
	1670.83	1025.41	1249.94	451.301	944.309	687.475	655.075	1122.26
	1669.77	1043.33	1251.94	460.337	984.998	714.521	620.917	1129.93
	1668.71	1121.12	1311.62	464.876	901.417	737.13	673.305	1122.11
	1667.65	1100.4	1185.86	506.245	1025.71	761.848	645.097	1123.3
	1666.59	1017.84	1306.98	423.794	997.733	754.762	685.519	1146.64
	1665.53	1047.94	1334.74	474.397	967.381	708.191	674.59	1201.45
	1664.48	1058.09	1322.17	505.283	949.922	729.274	674.846	1218.77
	1663.42	1118.2	1302.12	498.655	961.653	778.38	676.986	1226.83
	1662.36	1116.29	1370.42	462.129	919.335	751.033	702.315	1181.48
	1661.3	1123.22	1299.45	475.939	912.342	738.433	686.398	1207.42
	1660.24	1097.66	1336.79	491.56	923.602	716.846	635.73	1234.41
	1659.18	1133.12	1333.49	467.572	935.214	740.012	646.881	1239.03
	1658.12	1116.04	1260.33	430.108	939.407	718.801	672.68	1248.07
	1657.06	1143.07	1331.88	443.808	968.405	734.129	705.793	1277.4
	1656	1125.66	1386.32	449.24	969.096	777.658	714.062	1328.98
	1654.94	1129.96	1405.25	480.969	942.745	788.577	695.882	1376.13
	1653.89	1142.35	1341.31	476.316	961.41	823.658	704.55	1384.92
	1652.83	1128.24	1368.02	443.95	983.421	799.387	665.741	1393.56
	1651.77	1133.12	1421.15	469.831	977.433	772.304	694.537	1391.05
	1650.71	1143.12	1429.64	508.674	986.135	773.135	728.877	1359.57
	1649.65	1163.6	1413.02	517.567	968.608	805.147	726.11	1393.04
	1648.59	1180.75	1382.93	505.115	989.336	806.283	701.262	1428.85
	1647.53	1183.83	1409.31	490.81	1018.72	793.244	681.162	1495.61
	1646.47	1205.45	1446.31	492.091	1015.3	813.621	706.443	1452.29
	1645.41	1238.06	1440.5	495.564	1021.76	813.117	711.933	1442.83
	1644.35	1263.61	1418.71	484.714	1064.13	847.074	683.688	1510.91
	1643.3	1253.84	1403.22	487.368	1102.12	885.264	695.018	1561.92
	1642.24	1203.03	1490.4	503.469	1052.19	865.19	727.888	1597.6
	1641.18	1201.14	1552.07	513.342	1037.29	869.434	755.446	1537.06
	1640.12	1251.56	1460.64	534.286	1113.52	831.107	759.449	1545.14
	1639.06	1245.66	1481.47	534.104	1096.68	836.731	738.741	1583.66
	1638	1216.89	1500.88	520.538	1059.99	895.682	781.809	1618.4
	1636.94	1245.38	1500.07	509.552	1046.35	888.486	801.444	1660.88
	1635.88	1211.13	1545.13	510.824	1060.88	903.145	763.856	1685.8
	1634.82	1287.53	1505.57	533.899	1107.66	913.872	764.804	1712.95
	1633.76	1324.47	1569.01	557.346	1108.11	886.139	753.543	1705.56
	1632.71	1378	1601.46	520.605	1124.8	943.012	790.044	1770.68
	1631.65	1334.55	1662.26	506.576	1120.28	904.986	809.694	1814.89
	1630.59	1318.46	1673.65	525.204	1089.74	932.563	824.323	1847.38
	1629.53	1348.93	1660.37	533.39	1122.87	978.058	817.903	1873.72
	1628.47	1386.54	1668.16	536.334	1119.08	989.821	817.786	1881.83
	1627.41	1341.32	1642.98	549.752	1181.6	982.127	848.211	1932.17
	1626.35	1385.72	1751.62	565.303	1197.88	959.731	907.926	1938.36
	1625.29	1425.7	1702.12	580.848	1137.3	1069.1	816.099	1945.8
	1624.23	1432.45	1692.5	563.209	1198.41	1047.84	852.654	1993.3
	1623.17	1449.63	1702.59	538.785	1217.78	1023.15	838.918	2027.93
	1622.12	1471.38	1723.84	555.818	1220.81	1083.85	873.15	2048.62
	1621.06	1479.28	1776.1	555.604	1265.2	1013.31	888.7	2034.06
	1620	1475.93	1763.16	557.178	1220.27	1008.48	898.008	2061.52
	1618.94	1442.89	1778.3	604.608	1205.51	1026.3	848.242	2160.69
	1617.88	1499.5	1738.3	596.429	1269.68	1040.7	873.564	2180.46
	1616.82	1489.35	1768.84	626.752	1221.39	1015.22	861.739	2266.75
	1615.76	1501.31	1784.75	608.636	1260.46	1065.59	927.785	2261.05
	1614.7	1534.24	1811.6	530.11	1242.4	1075.15	882.157	2338.23
	1613.64	1571.1	1823.53	562.537	1221.44	1081.15	913.181	2287.83
	1612.58	1568.45	1852.21	595.638	1204.12	1098.02	950.683	2421.7
	1611.52	1570.08	1908.33	597.937	1248.45	1081.5	952.482	2419.33
	1610.47	1578.58	1892.65	600.531	1253.37	1094.42	954.623	2441.11
	1609.41	1623.78	1838.49	634.365	1253.61	1125.82	936.74	2515.25
	1608.35	1622.53	1872.63	632.724	1280.62	1190.31	913.169	2478.29
	1607.29	1649.43	1909.24	627.264	1285.42	1150.32	934.028	2519.53
	1606.23	1695.64	1907.13	603.489	1311.74	1098.6	963.464	2591.67
	1605.17	1672.94	1947.85	592.271	1365.97	1144.66	958.676	2557.86
	1604.11	1642.4	2004.66	644.89	1370.13	1181.69	960.728	2513.69
	1603.05	1650.45	2001.13	651.655	1341.08	1208.86	992.344	2596.67
	1601.99	1717.2	1980.21	643.31	1337.99	1179.38	1008.29	2633.35
	1600.93	1737.66	2041.67	630.676	1350.69	1181.98	990.155	2598.96
	1599.88	1735.05	2041.75	623.488	1364.36	1204.16	995.169	2567.76
	1598.82	1711.04	2034.71	636.654	1333.87	1232.63	1011.54	2649.17
	1597.76	1737.38	2100.74	640.245	1353.73	1237.05	1017.08	2654.28
	1596.7	1767.07	2034.01	621.237	1363.75	1285.37	1009.83	2686.53
	1595.64	1749.32	2003.09	646.793	1367.67	1246.59	1043.68	2706.09
	1594.58	1746.83	2103.13	681.879	1411.21	1273.8	1022.11	2727.72
	1593.52	1767.36	2134.27	658.759	1484.3	1238.2	1065.46	2721.7
	1592.46	1855.31	2168.8	670.619	1435.97	1265.25	1095.54	2701.23
	1591.4	1839.18	2161.44	696.185	1430.39	1269.2	1014.7	2732.77
	1590.34	1894	2141.19	691.644	1390.41	1264.56	1056.43	2743.3
	1589.29	1793.6	2127.5	682.734	1381.06	1305.81	1056.61	2741.5
	1588.23	1805.71	2246.73	705.42	1517.49	1351.69	1035.33	2741.33
	1587.17	1806.76	2256.17	658.42	1416.68	1361.17	1084.22	2783.61
	1586.11	1943.31	2222.51	675.787	1488.76	1322.55	1043.31	2781.04
	1585.05	1894.33	2203.42	662.657	1452.07	1306.41	1071.01	2695.05
	1583.99	1923.69	2252.36	675.108	1413.98	1356.32	1103.62	2720.17
	1582.93	1930.2	2212.54	701.691	1391.01	1278.8	1079.17	2782.53
	1581.87	1915.03	2240.8	723.595	1484.24	1358.98	1093.55	2720.66
	1580.81	1978.28	2258.23	699.533	1505.02	1399.86	1048.27	2803.8
	1579.75	1910.1	2240.01	700.606	1498.34	1298.03	1036.31	2721.84
	1578.7	1862.1	2180.91	656.466	1494.64	1346.25	1050.3	2678.75
	1577.64	1869.23	2212.17	625.352	1526.17	1355.47	1088.9	2774.98
	1576.58	1844.43	2199.46	673.36	1515.92	1334.76	1087.41	2764.66
	1575.52	1853.76	2173.44	689.408	1512.14	1330.34	1087.49	2771.98
	1574.46	1910.6	2185.64	690.664	1515.95	1296	1100.97	2802.39
	1573.4	1937.98	2228.49	703.917	1523.82	1300.93	1091.38	2674.63
	1572.34	1905.25	2263.85	683.505	1531.18	1326.08	1082.59	2619.16
	1571.28	1850.31	2232.45	677.104	1515.73	1331.74	1069.84	2671.53
	1570.22	1838.54	2236.94	667.305	1538.78	1336.08	1074.99	2585.53
	1569.16	1842.98	2180.39	676.971	1481.32	1319.85	1092.9	2617.95
	1568.11	1852.18	2165.18	729.62	1521.43	1350.72	1103.46	2678.26
	1567.05	1883.14	2188.13	706.039	1543.75	1347.47	1114.36	2601.73
	1565.99	1871.36	2243.51	733.742	1456.27	1267.83	1059.81	2636.96
	1564.93	1892.39	2245.07	689.508	1466.72	1290.46	1012.09	2643.91
	1563.87	1759.76	2195.51	684.007	1482.29	1316.94	1135.39	2556.27
	1562.81	1812.87	2234.8	697.952	1456.7	1327.32	1107.38	2544.12
	1561.75	1874.41	2168.69	613.354	1524.86	1307.23	1062.28	2572.26
	1560.69	1823.76	2231.71	617.614	1480.83	1348.54	1114.58	2600.55
	1559.63	1838.25	2173.22	686.887	1551.78	1305.23	1067.05	2546.66
	1558.57	1888.53	2184.59	673.419	1521.62	1300.85	1025.08	2415.74
	1557.51	1848.95	2163.62	691.682	1466.52	1312.37	1057.11	2475.2
	1556.46	1819.64	2207.74	690.529	1518.02	1349.96	1052.41	2452.7
	1555.4	1831.23	2176.6	725.917	1463.83	1324.03	1063.07	2501.71
	1554.34	1850.51	2145.48	698.719	1476.43	1308.68	1079.85	2440.65
	1553.28	1881.24	2153.26	690.417	1470.7	1301.35	1088.92	2427.7
	1552.22	1850.84	2153.92	673.015	1450.83	1322.39	1093.7	2411.92
	1551.16	1853.51	2171.7	659.863	1449.87	1290.84	1086.23	2442.1
	1550.1	1842.19	2129.5	673.664	1467.86	1317.46	1070.23	2350.44
	1549.04	1837.97	2111.74	684.371	1510.64	1309.85	1033.52	2358.7
	1547.98	1812.26	2141.79	673.603	1487.67	1290.87	1061.35	2351.99
	1546.92	1781.61	2166.37	651.732	1439.72	1317.81	1091.37	2336.83
	1545.87	1802.4	2165.57	650.664	1451.89	1290.12	1061.58	2338.8
	1544.81	1798.49	2128.64	665.748	1451.11	1244.97	1043.46	2333.39
	1543.75	1752.19	2105.6	652.627	1428.48	1259.44	1031.88	2271.45
	1542.69	1774.13	2113.3	643.674	1454.26	1262.06	1027.98	2343.44
	1541.63	1799.09	2084.79	673.806	1460.62	1259.2	1041.61	2350.09
	1540.57	1724.19	2060.4	669.922	1413.07	1232.88	1031.4	2299.14
	1539.51	1733.61	2005.54	658.925	1396.02	1272.02	1042.35	2270.98
	1538.45	1652.24	2045.55	643.417	1426.86	1254.68	992.084	2253.18
	1537.39	1666.11	2091.83	645.586	1390.02	1245.41	941.714	2234.73
	1536.33	1735.17	2126.16	620.027	1415.99	1203.82	988.585	2263.98
	1535.28	1747.96	2104.34	658.548	1361.56	1217.63	1024.78	2267.35
	1534.22	1764.93	2090.98	684.362	1385.08	1269.27	966.237	2236.38
	1533.16	1641.76	1996.91	650.751	1383.15	1259.41	992.553	2262.28
	1532.1	1726.69	2008.76	652.5	1390.86	1238.24	1038.68	2254.52
	1531.04	1727.52	1954.55	683.714	1405.04	1208.66	1001.21	2196.53
	1529.98	1815.24	2032.49	648.592	1430.89	1253.24	1002.92	2171.63
	1528.92	1726.78	2044	595.766	1398.09	1255.91	996.218	2120.98
	1527.86	1722.68	2011.6	641.264	1348.7	1197.54	1014.62	2182.3
	1526.8	1670.73	1978.5	636.043	1384.68	1209.8	993.422	2141.4
	1525.74	1642.19	2009.61	650.158	1429.82	1226.93	1032.57	2057.41
	1524.69	1629.35	2038.42	638.947	1425.86	1267.59	1033.41	2198.24
	1523.63	1677.87	2015.8	620.413	1388.61	1261.64	1011.73	2137.5
	1522.57	1733.49	2016.66	597.614	1379.39	1232.69	1036.61	2146.47
	1521.51	1702.77	2012.87	589.55	1402.83	1244.78	1006.38	2134.69
	1520.45	1699.15	1981.96	620.5	1366.68	1241.81	951.416	2165.36
	1519.39	1748.47	1968.34	635.27	1327.74	1233.33	992.805	2165.34
	1518.33	1731.03	1956.05	617.885	1380.94	1238.33	1026.65	2107.18
	1517.27	1717.61	1963.63	599.438	1369.18	1170.63	999.459	2127.45
	1516.21	1661.19	1925.72	607.143	1361.61	1155.01	985.65	2113.88
	1515.15	1611.18	1936.42	633.005	1425.37	1207.34	982.647	2144.32
	1514.1	1711.72	1962.99	633.835	1429.6	1189.79	958.755	2098.06
	1513.04	1709.09	1971.84	639.945	1408.33	1205.31	985.591	2092.49
	1511.98	1680.92	1984.35	642.179	1373.05	1185.73	1020.96	2119.91
	1510.92	1573.53	1956.08	607.748	1366.39	1125.53	997.218	2128.32
	1509.86	1661.18	1910.68	581.898	1400.45	1157.49	1020.62	2115.46
	1508.8	1579.28	1987.85	645.947	1356.89	1177.23	976.61	2042.65
	1507.74	1605.21	1985.83	619.479	1280.39	1124.6	1010.65	2033.18
	1506.68	1619.68	2016.88	619.561	1334.56	1157.79	1003.87	2034.15
	1505.62	1650.75	1941.33	593.136	1292.5	1196.47	947.362	2005.19
	1504.56	1631.92	1880.17	603.994	1352.44	1182.57	947.029	1983.06
	1503.5	1629.91	1873.44	611.474	1323.7	1187.07	957.707	1973.97
	1502.45	1648.04	1894.99	605.756	1324.06	1154.28	984.957	1995.75
	1501.39	1599.3	1884.95	625.536	1306.67	1122.59	985.788	2027
	1500.33	1589.04	1877.64	623.62	1296.09	1115.48	981.039	2035.18
	1499.27	1650.73	1908.37	597.921	1332.22	1148.62	987.237	2001.83
	1498.21	1667.4	1920.25	605.826	1342.08	1182.97	976.634	2063.66
	1497.15	1621.8	1904.54	597.07	1304.64	1137.81	971.367	2035.27
	1496.09	1603.73	1903.13	563.482	1290.16	1085.11	975.162	1990.4
	1495.03	1623.63	1881.47	599.335	1322.43	1119.1	952.053	2055.05
	1493.97	1614.46	1843.3	592.416	1321.81	1128.13	965.114	1990.71
	1492.91	1634.29	1808.96	581.933	1304.57	1112.78	976.133	1964.52
	1491.86	1557.6	1813.16	634.292	1316.99	1122.92	942.182	2022.5
	1490.8	1615.44	1835.85	624.934	1250.23	1137.94	1038.61	2006.31
	1489.74	1573.93	1895.39	568.002	1310.24	1216.48	990.136	1953.41
	1488.68	1624.74	1905.68	584.929	1386.65	1182.19	960.14	2016.93
	1487.62	1606.43	1922.25	593.475	1352.05	1137.43	961.566	2077.02
	1486.56	1555.29	1867.62	546.428	1301.76	1118.27	927.869	2017
	1485.5	1654.89	1919.7	590.471	1293.38	1177.59	996.072	1999.38
	1484.44	1598.85	1887.54	600.453	1315.53	1133.68	982.45	1977.13
	1483.38	1580.29	1843.84	588.882	1277.45	1125.98	938.422	1970.04
	1482.32	1581.19	1833.56	589.111	1295.9	1122.7	984.279	1967.5
	1481.27	1590.74	1853.62	605.22	1344.53	1119.62	995.257	2047.42
	1480.21	1589.82	1797.8	605.688	1328.58	1141.35	991.532	2031.2
	1479.15	1587.13	1816.3	592.842	1316.84	1147.85	978.468	1986.23
	1478.09	1576.27	1877.66	609.613	1326.18	1153.93	970.787	1945.44
	1477.03	1529.83	1887.65	623.235	1321.45	1183.41	969.698	2040.07
	1475.97	1510.18	1912.27	595.547	1301.77	1177.44	952.781	2036.89
	1474.91	1562.87	1906.97	592.606	1296.58	1151.78	950.482	1989.8
	1473.85	1583.76	1868.45	610.896	1344.73	1169.38	961.351	1888.1
	1472.79	1574.29	1886.28	575.423	1327.97	1133.56	974.142	1939.94
	1471.73	1569.66	1826.92	598.316	1346.49	1158.15	961.188	1982.66
	1470.68	1633.2	1841.89	574.367	1317.69	1109.87	994.484	2006.19
	1469.62	1642.14	1846.26	614.433	1348.37	1102.68	975.872	1982.2
	1468.56	1553.04	1896.65	654.485	1365.03	1121.5	1005.28	1942.34
	1467.5	1676.78	1883.82	603.922	1310.04	1123.45	973.585	1953.11
	1466.44	1602.48	1952.24	580.899	1350.21	1065.75	913.885	2000.99
	1465.38	1569.71	1899.03	587.639	1310.67	1073.3	979.213	2045.86
	1464.32	1554.53	1882.97	613.766	1296.32	1131.81	1000.43	1992.14
	1463.26	1570.75	1878.39	627.003	1317.31	1131.07	976.25	1961.32
	1462.2	1606.26	1906.8	594.844	1328.6	1124.75	946.815	1993.24
	1461.14	1607.49	1897.71	591.64	1324.31	1149.29	961.87	1968.82
	1460.09	1614.5	1899.07	605.092	1305.62	1143.21	977.093	1982.21
	1459.03	1615.78	1906.92	598.728	1295.88	1120.7	996.113	2036.74
	1457.97	1621.67	1913.22	592.734	1293.81	1074.74	1010.61	1956.36
	1456.91	1618.05	1914.88	599.278	1315.97	1068.73	990.556	1982.96
	1455.85	1575.86	1873.52	609.429	1343.16	1135.38	963.654	2033.07
	1454.79	1599.05	1818.67	612.003	1325.06	1143.6	970.043	1971.59
	1453.73	1676.5	1818.39	589.724	1347.79	1163.48	995.789	2026.27
	1452.67	1625.19	1893.68	613.297	1335.89	1170.71	979.17	2064.84
	1451.61	1612.45	1898.16	597.275	1324.44	1170.56	1045.04	2012.33
	1450.55	1561.8	1932.77	617.671	1350.87	1210.95	1011.05	2033.98
	1449.49	1607.47	1892.52	630.119	1335.96	1166.53	975.337	2036.99
	1448.44	1552.59	1856.48	627.901	1339.91	1078.15	1015.03	2008.38
	1447.38	1553.07	1960.77	576.27	1304.32	1193.37	967.751	2048.12
	1446.32	1601.27	1942.47	606.605	1297.74	1164.04	1020.42	2053.55
	1445.26	1628.01	1927.07	577.985	1357.26	1202.84	994.548	2060.96
	1444.2	1645.49	1943.26	589.517	1349.27	1219.97	986.4	2015.63
	1443.14	1599.1	1943.19	607.038	1287.73	1190.32	987.479	1992.97
	1442.08	1566.78	1856.5	600.852	1322.01	1186.05	985.961	2027.88
	1441.02	1611	1887.35	623.649	1383.26	1201.08	1018.54	2057.15
	1439.96	1637.57	1968.01	630.805	1393.91	1190.87	1025.46	1966.74
	1438.9	1600.64	1987.94	611.15	1399.95	1181.89	1020.2	1992.09
	1437.85	1572.54	1991.19	608.596	1396.48	1189.12	1044.31	2049.22
	1436.79	1597.52	1961.45	600.848	1356.16	1183.21	1031.86	1998.48
	1435.73	1663.39	1950.06	605.082	1358.06	1181.13	1009.41	2051.57
	1434.67	1703.67	1963.49	625.945	1392.92	1179.6	1022.62	2113.66
	1433.61	1668.07	1954.72	562.664	1410.9	1225.59	1015.92	2109.77
	1432.55	1618.93	1886.01	600.27	1380.97	1137.08	1068.58	2054.18
	1431.49	1716.82	1905.18	612.311	1294.79	1174.1	1049.38	2039.92
	1430.43	1605.97	2009.09	585.085	1392.56	1178.05	1005.39	2053.68
	1429.37	1617.31	1973.08	630.761	1381.93	1160.32	1000.82	2044.71
	1428.31	1633.93	1939.94	609.063	1353.97	1139.5	1038.93	2056.65
	1427.26	1616.25	1967.88	596.409	1384.11	1150.78	1062.08	2068.5
	1426.2	1656.78	1948.03	631.859	1360.18	1152.07	1013.21	2032.68
	1425.14	1657.34	1922.44	624.42	1367.11	1213.54	1028.16	2002.47
	1424.08	1664.96	1943.52	593.588	1383.81	1216.74	1017.26	2009.2
	1423.02	1658.96	1985.44	570.153	1405.79	1193.27	1024	2027.74
	1421.96	1628.46	1992.84	582.025	1392.75	1211.42	1037.92	2089.73
	1420.9	1633.01	1956	622.012	1354.36	1229.42	1038.46	2034.55
	1419.84	1659.53	1948.6	651.976	1372.73	1235.26	1060.86	2011.76
	1418.78	1639.66	1996.48	658.565	1409.6	1273.39	1055.16	2021.63
	1417.72	1615.35	1999.93	636.654	1372.78	1288.98	1046.69	2033.24
	1416.67	1654.04	2043.37	626.314	1335.21	1217.07	1073.15	2065.76
	1415.61	1707.26	2041.46	592.664	1354.95	1218.76	1089.47	2108.94
	1414.55	1715.64	2007.91	631.513	1404.6	1255.41	1029.93	2096.68
	1413.49	1667.67	2044.81	585.818	1389.83	1207.53	1067.02	2040.18
	1412.43	1669.45	1982.11	623.771	1408.93	1201.43	1036.4	2049.14
	1411.37	1701.07	1956.21	594.674	1421.96	1237.82	1045.67	2107.4
	1410.31	1633.23	1984.77	639.461	1346.81	1201.96	977.795	2103.92
	1409.25	1636.59	1953.03	627.603	1388.5	1184.54	985.424	2128.55
	1408.19	1649.37	1984.66	613.751	1425.89	1192.4	999.605	2107.73
	1407.13	1639.02	1999.2	633.963	1409.97	1165.44	1052.48	2090.12
	1406.08	1633.85	1972.19	634.624	1363.1	1159.35	1086.86	2090.32
	1405.02	1647.76	1963.82	615.658	1353.18	1202.17	1081.51	2166.36
	1403.96	1634.89	1963.96	607.792	1371.52	1238.79	1060.48	2116.23
	1402.9	1597.74	1947.41	617.92	1390.4	1230.19	1057.05	2147.98
	1401.84	1611.2	1970.03	636.55	1436.25	1210.76	1099.07	2199.62
	1400.78	1659	2031.07	609.266	1407.43	1241.36	1074.1	2137.79
	1399.72	1773.81	2021.88	592.538	1379.55	1224.04	1060.05	2132.93
	1398.66	1707.47	2066.89	596.231	1398.71	1201.03	1104.3	2149.65
	1397.6	1641.26	2029.43	540.537	1429.32	1149.34	1025.86	2179.64
	1396.54	1653.16	1993.99	602.05	1412.64	1204.57	1039.91	2200.54
	1395.48	1712.95	2046.49	648.396	1393.99	1227.43	1086.6	2184.12
	1394.43	1737.65	2003.43	591.178	1362.82	1235.44	1070.5	2156.29
	1393.37	1778.5	1954.7	580.134	1371.73	1257.56	1019.26	2109.33
	1392.31	1719.5	1969.42	589.134	1367.01	1222.25	999.74	2155.88
	1391.25	1727	1994.87	586.059	1402.68	1219.32	1035.16	2130.39
	1390.19	1718	2016.51	601.563	1413.17	1240.81	1074.87	2172.45
	1389.13	1697.21	1964.58	628.148	1375.88	1222	1058.13	2192.59
	1388.07	1690.69	1923.23	626.245	1365.68	1192.16	1029.21	2153.5
	1387.01	1663.64	1969.67	606.17	1370.9	1173.49	1047.18	2155.82
	1385.95	1689.35	1959.07	603.697	1337.4	1144.68	1072.81	2158.58
	1384.89	1727.32	1947.88	609.97	1359.85	1185.6	1074.14	2207.67
	1383.84	1685.68	2002.26	624.129	1409.15	1224.33	1028.67	2230.04
	1382.78	1767.26	2001.6	592.284	1382.24	1203.85	1081.09	2186.03
	1381.72	1646.01	1997.12	633.154	1326.64	1244.6	1095.22	2138.9
	1380.66	1695.72	1939.74	594.662	1419.58	1140.89	1080.87	2111.29
	1379.6	1686.34	2019.37	570.735	1394.92	1237.57	1087.03	2141.45
	1378.54	1656.12	1993.52	587.876	1373.67	1275.9	1025.83	2221.08
	1377.48	1684.61	1950.78	583.914	1366.03	1257.59	1060.86	2181.73
	1376.42	1679.98	1989.36	582.94	1410.16	1228.1	1052.55	2169.21
	1375.36	1649.28	2012.92	605.987	1442.19	1201.81	1054.73	2275.77
	1374.3	1686.79	2010.87	614.876	1432.9	1211.75	1060.75	2176.07
	1373.25	1735.12	2044.46	614.105	1418.63	1225.19	1068.61	2149.09
	1372.19	1731.51	2084.18	631.121	1409.4	1211.47	1095.77	2198.9
	1371.13	1737.7	2043.43	634.387	1397.23	1234.6	1077.79	2175.92
	1370.07	1748.75	1952.49	607.577	1395.58	1306.55	1023.43	2173
	1369.01	1732.42	1959.09	623.786	1369.05	1291.44	1103.19	2222.45
	1367.95	1766.59	2049.28	638.224	1389.75	1242.09	1115.45	2241.08
	1366.89	1704.31	2051.5	636.799	1377.22	1266.93	1035.16	2207.25
	1365.83	1703.98	2083.68	673.323	1362.7	1219.85	1026.81	2179.64
	1364.77	1720.94	2021.77	656.112	1424.99	1268.75	1122.18	2196.84
	1363.71	1733.63	2051.22	639.155	1416.04	1247.62	1117.9	2247.38
	1362.66	1727.83	2061.84	622.752	1400.23	1203.57	1097.34	2273.45
	1361.6	1746.31	2005.49	616.5	1423.41	1253.67	1110.12	2210.26
	1360.54	1820.33	1989.08	610.476	1454	1279.6	1131.16	2253.07
	1359.48	1815.4	2022.6	613.549	1449.56	1249.94	1135.64	2182.79
	1358.42	1768.57	2061.06	619.778	1417.92	1217.66	1137.11	2229.07
	1357.36	1769.45	2070.34	614.77	1392.08	1238.23	1120.98	2316
	1356.3	1792.93	2067.89	619.533	1414.42	1272.57	1104.65	2247.01
	1355.24	1821.67	2077.36	650.552	1468.78	1238.8	1147.01	2216.59
	1354.18	1759.07	1997.76	645.394	1418.68	1271.08	1117.73	2229.61
	1353.12	1731.04	2011.29	609.288	1468.85	1246.31	1081.09	2192.58
	1352.06	1710.72	2043.11	621.595	1451.99	1262.29	1108.96	2220.02
	1351.01	1726.57	2046.76	665.99	1393.03	1278.23	1098.62	2249.88
	1349.95	1772.51	2067.32	620.235	1456.14	1250.97	1099.55	2219.97
	1348.89	1824.23	2023.88	629.315	1432.54	1225.49	1120.27	2215.65
	1347.83	1803.34	2010.87	632.306	1401.13	1281.89	1097.64	2206.93
	1346.77	1757.74	2043.9	614.843	1436.6	1251.11	1061.03	2206.08
	1345.71	1795.69	2107.99	610.125	1430.96	1279.37	1092.02	2132.77
	1344.65	1833.97	2089.66	620.222	1391.86	1273.75	1113.32	2190.82
	1343.59	1791.93	2019.78	605.157	1393.97	1223.19	1113.9	2206.56
	1342.53	1741.05	2020.12	593.498	1400.85	1233.05	1107.38	2205.49
	1341.47	1736.41	2051.82	624.611	1375.39	1237.73	1066.07	2208.15
	1340.42	1721.21	2035.79	601.074	1418.34	1242.5	1105.27	2245.62
	1339.36	1734.53	2048.16	581.767	1464.21	1284.56	1097.07	2263.35
	1338.3	1799.48	2023.85	626.983	1394.37	1226.84	1006.63	2223.4
	1337.24	1785.02	2055.69	647.009	1398.12	1242.71	1026.58	2182.6
	1336.18	1760.93	2072.1	641.976	1399.95	1256.66	1106.25	2195.3
	1335.12	1787.46	1955.78	623.484	1431.61	1263.47	1063.64	2194
	1334.06	1779.91	1986.2	647.841	1456.42	1199.15	1105	2134.7
	1333	1778.56	2050.32	609.754	1472.57	1221.95	1094.76	2165.83
	1331.94	1756.52	2057.36	628.155	1409.49	1218.82	1090.08	2210.63
	1330.88	1756.19	2010.98	626.334	1363.96	1249.69	1125.44	2178.96
	1329.83	1761.24	2006.25	594.372	1376.34	1259.01	1124.71	2104.15
	1328.77	1740.79	2031.47	611.837	1370.79	1201.49	1116.95	2129.63
	1327.71	1753.85	1997.06	619.673	1354.44	1209.8	1153.76	2168.26
	1326.65	1805.01	1992.61	562.204	1403.03	1234.93	1108.61	2162.86
	1325.59	1781.11	2023.13	560.994	1429.98	1232.35	1135.97	2123.54
	1324.53	1734.24	2031.76	607.716	1395.29	1264.87	1048.49	2167.51
	1323.47	1727.88	2065.41	621.617	1403.02	1164.47	1036.26	2236.81
	1322.41	1780.76	1997.82	599.23	1405.03	1186.23	1075.61	2197.22
	1321.35	1723.49	2008.76	632.439	1411.97	1189.7	1079.21	2129.92
	1320.29	1714.83	2024.58	636.78	1408.73	1203.57	1076.99	2164.07
	1319.24	1749.63	2007.49	632.041	1374.53	1226.93	1041.28	2117.21
	1318.18	1719.49	1986.85	612.017	1378.37	1222.13	1033.84	2075.57
	1317.12	1702.02	1986.1	619.681	1366.86	1189.49	1075.69	2097.2
	1316.06	1726.53	1999.46	645.776	1354.68	1187.84	1089.24	2120.8
	1315	1728.55	2000.99	626.329	1378.8	1197.59	1054.42	2114.74
	1313.94	1730.25	1981.38	597.271	1366.84	1162.27	1047.39	2128.13
	1312.88	1755.98	1973.57	646.958	1352.04	1179.68	1044.92	2055.46
	1311.82	1757.69	1964.58	593.038	1370.47	1133.59	1027.43	2114.21
	1310.76	1699.52	2009.85	620.851	1376.07	1209.07	1057.09	2130.86
	1309.7	1679.24	1967.56	636.683	1345.87	1220.8	1056.88	2105.78
	1308.65	1666.26	1945.37	595.922	1322.99	1133.95	1085.87	2096.96
	1307.59	1672.11	1885.47	579.639	1305.75	1150.18	1086.22	2074.91
	1306.53	1700.89	1870.35	584.287	1311.64	1145.62	1059.4	2106.16
	1305.47	1694.94	1893.38	594.124	1329.2	1148.79	1026.64	2074.4
	1304.41	1677.9	1893.32	603.96	1292.95	1149.96	1007.99	2070.63
	1303.35	1703.46	1875.52	616.612	1285.49	1129.43	1030.86	2078.18
	1302.29	1710.41	1887.75	612.601	1342.04	1122.52	1051.01	2007.08
	1301.23	1635.28	1927.28	577.843	1350.02	1167.77	1027.35	2056.73
	1300.17	1599.13	1935.26	564.202	1300.27	1210.23	1039.81	2064.45
	1299.11	1640.58	1890.56	617.38	1242.17	1143.91	1038.69	2047.75
	1298.05	1739.35	1960.07	636.232	1289.5	1163.4	1031.72	2050.44
	1297	1673.56	1888.29	620.24	1332.86	1099.71	1071.17	1978.4
	1295.94	1665.14	1851.64	548.643	1322.54	1176.78	1027.28	1925.94
	1294.88	1722.68	1942.9	541.708	1295.03	1171.87	1019.29	1991.45
	1293.82	1696.33	1901	574.394	1281.41	1119.98	1023.55	1995.24
	1292.76	1675.18	1861.16	598.878	1288.94	1122.5	1020.12	1952.32
	1291.7	1659.32	1854.54	624.76	1265.04	1129.72	1027.79	2035.02
	1290.64	1638.92	1865.43	640.324	1257.67	1120.36	1038.87	2002.9
	1289.58	1646.12	1860.23	627.066	1292.58	1114.65	1029.18	1970.8
	1288.52	1671.06	1834.35	599.221	1320.5	1119.31	1004.75	1924.71
	1287.46	1662.47	1867.93	577.396	1346.18	1138.32	997.11	1969.26
	1286.41	1671.88	1864.41	578.61	1294.9	1098.01	1015.72	1913.53
	1285.35	1648.07	1802.74	574.536	1185.23	1102.31	978.884	1904.12
	1284.29	1639.84	1743.12	570.47	1271.88	1139.61	998.435	1919.36
	1283.23	1584.22	1842.11	544.534	1256.42	1094.87	1019.8	1873.06
	1282.17	1634.39	1819.99	567.549	1291.43	1079.35	1021.66	1842.44
	1281.11	1624.3	1803.68	598.078	1294.97	1101.73	971.553	1885.06
	1280.05	1551.56	1742.35	580.669	1289.2	1085.63	963.822	1854.81
	1278.99	1533	1732.6	557.712	1245.85	1074.48	975.204	1890.64
	1277.93	1545.41	1781.52	568.705	1224.26	1066.74	989.338	1864.65
	1276.87	1522.72	1802.99	581.681	1255.14	1037.44	1010.02	1799.04
	1275.82	1505.04	1795.15	549.823	1239.35	1034.14	997.665	1796.23
	1274.76	1505.07	1783.31	497.17	1190.46	1063.95	959.367	1833.97
	1273.7	1509.38	1776.2	510.677	1260.67	1060.18	981.657	1849.06
	1272.64	1546.44	1807.31	595.152	1228.95	1085.54	965.722	1827.07
	1271.58	1560.38	1755.59	567.897	1276.19	1080.07	961.347	1796.92
	1270.52	1530.39	1707.36	579.992	1220.83	1084.38	986.757	1768.07
	1269.46	1556.62	1777.47	540.305	1188.99	1065.29	954.126	1735.87
	1268.4	1526.18	1767.9	555.807	1180.72	1062.62	918.399	1723.68
	1267.34	1472.4	1708.65	554.915	1177.34	1028.21	941.329	1723.92
	1266.28	1468.01	1667.04	553.694	1176.11	1019.94	971.647	1764.43
	1265.23	1520.29	1691.1	561.384	1172.33	1025.94	943.549	1703.25
	1264.17	1572.29	1725.55	554.642	1176.39	1003.55	910.076	1752.36
	1263.11	1555.25	1633.9	575.5	1214.08	1050.2	948.559	1688.89
	1262.05	1460.21	1613.2	529.195	1233.34	1067.12	918.924	1676.12
	1260.99	1441.41	1713.89	569.654	1203.54	1032.05	905.555	1649.5
	1259.93	1517.39	1738.96	559.759	1160.27	1033.8	938.616	1634.95
	1258.87	1554.14	1664.01	582.011	1165.19	1039.11	932.407	1665.53
	1257.81	1504.24	1649.67	535.637	1168.36	1033.62	906.512	1679.1
	1256.75	1474.68	1669.47	559.699	1181.26	1014.4	941.346	1644.07
	1255.69	1459.49	1642.28	549.542	1144.4	999.172	957.158	1646.49
	1254.64	1426.39	1623.82	523.969	1133.45	999.305	918.967	1705.42
	1253.58	1413.19	1638.44	521.411	1148.75	1010.5	884.854	1648.4
	1252.52	1438.17	1643.34	523.53	1136.82	1012.76	906.07	1622.29
	1251.46	1436.18	1632.86	535.691	1150.73	994.508	936.237	1685.92
	1250.4	1424.14	1586.6	524.925	1150.13	988.217	885.457	1619.48
	1249.34	1384	1646.89	535.989	1132.74	980.392	879.049	1592.79
	1248.28	1403.19	1611.49	518.348	1136.4	982.137	851.598	1617.57
	1247.22	1379.54	1636.8	527.491	1075.8	980.312	886.636	1637.83
	1246.16	1458.39	1570.74	513.656	1104.65	967.046	890.819	1623.05
	1245.1	1374.86	1571.84	514.949	1120.26	944.315	893.697	1562.08
	1244.04	1345.89	1609.69	522.185	1111.23	948.671	865.916	1570.57
	1242.99	1377.2	1622.36	513.973	1121.33	954.882	850.979	1520.41
	1241.93	1401.3	1610.37	499.66	1132.19	955.315	873.057	1496.78
	1240.87	1413.92	1614.49	495.074	1131.32	974.241	884.119	1543.2
	1239.81	1384.75	1635.01	498.725	1149.68	979.288	865.959	1534.59
	1238.75	1438.58	1574.99	531.401	1058.39	911.876	881.634	1507.31
	1237.69	1354.82	1485.38	494.415	1087.28	952.444	815.463	1529.53
								1534.47
								1524.65
								1535.2
								1501.46
								1501.9
								1491.89

## Sheet: Figure S-13
	FIGURE S-13 RAMAN DATA
	Raman shift cm-1	Counts			x0 = 2311.53711
	2311.54	931.515	801.777		dx = -1.05967 (cm-1)
	2310.48	949.631	705.499
	2309.42	880.475	711.356
	2308.36	887.559	749.828
	2307.3	889.478	752.048
	2306.24	850.566	742.776
	2305.18	833.031	795.464
	2304.12	860.327	731.226
	2303.06	886.575	769.524
	2302	888.893	769.392
	2300.94	857.703	735.963
	2299.88	878.7	722.301
	2298.82	918.301	723.152
	2297.76	939.297	734.864
	2296.7	938.804	717.469
	2295.64	908.08	706.186
	2294.58	872.977	695.193
	2293.52	883.006	710.594
	2292.46	910.055	716.219
	2291.4	879.694	675.781
	2290.34	851.519	753.735
	2289.28	871.633	719.668
	2288.22	829.736	697.529
	2287.16	811.629	714.712
	2286.11	849.072	690.728
	2285.05	887.647	732.953
	2283.99	891.653	744.209
	2282.93	858.106	719.406
	2281.87	903.156	705.022
	2280.81	889.94	704.044
	2279.75	875.447	664.815
	2278.69	828.274	714.361
	2277.63	856.244	685.811
	2276.57	899.197	711.982
	2275.51	880.313	703.866
	2274.45	895.392	661.938
	2273.39	848.065	690.078
	2272.33	883.154	691.164
	2271.27	860.847	715.211
	2270.21	887.167	746.698
	2269.15	886.824	709.27
	2268.09	923.339	705.055
	2267.03	901.349	720.225
	2265.97	932.641	671.313
	2264.91	892.001	705.822
	2263.85	872.211	673.719
	2262.79	877.339	661.414
	2261.73	905.436	681.831
	2260.67	925.249	703.429
	2259.61	917.031	689.143
	2258.55	892.747	658.036
	2257.49	846.921	660.236
	2256.43	863.315	714.35
	2255.37	901.633	711.526
	2254.31	915.683	660.004
	2253.26	856.28	736.786
	2252.2	886.378	717.864
	2251.14	887.192	696.204
	2250.08	893.272	690.017
	2249.02	901.791	690.044
	2247.96	878.312	704.848
	2246.9	833.7	681.341
	2245.84	857.019	697.087
	2244.78	922.65	702.792
	2243.72	913.198	707.27
	2242.66	868.145	727.193
	2241.6	859.935	715.219
	2240.54	879.043	709.402
	2239.48	852.121	689.942
	2238.42	858.21	708.333
	2237.36	877.825	706.639
	2236.3	874.18	684.925
	2235.24	860.072	701.104
	2234.18	859.067	737.721
	2233.12	851.245	752.811
	2232.06	830.765	678.545
	2231	843.659	652.409
	2229.94	880.245	663.969
	2228.88	889.598	681.843
	2227.82	879.237	641.387
	2226.76	836.893	640.971
	2225.7	821.635	704.115
	2224.64	873.275	710.362
	2223.58	885.794	693.632
	2222.52	867.849	700.083
	2221.47	863.756	707.139
	2220.41	874.637	698.72
	2219.35	841.339	680.688
	2218.29	851.77	658.765
	2217.23	909.958	719.487
	2216.17	937.608	718.624
	2215.11	904.888	688.149
	2214.05	870.589	672.886
	2212.99	892.88	710.989
	2211.93	906.674	684.347
	2210.87	873.505	692.454
	2209.81	851.804	730.496
	2208.75	866.68	677.629
	2207.69	839.716	646.79
	2206.63	882.386	716.551
	2205.57	898.051	677.94
	2204.51	880.548	669.318
	2203.45	880.138	673.955
	2202.39	888.591	714.254
	2201.33	931.58	691.799
	2200.27	876.101	693.618
	2199.21	829.459	679.52
	2198.15	852.439	707.634
	2197.09	881.189	706.731
	2196.03	897.665	719.809
	2194.97	846.787	709.919
	2193.91	851.576	713.075
	2192.85	785.756	639.143
	2191.79	829.452	665.434
	2190.73	893.267	701.075
	2189.68	873.553	719.218
	2188.62	841	686.105
	2187.56	894.954	698.58
	2186.5	881.487	672.025
	2185.44	836.112	706.244
	2184.38	825.285	688.947
	2183.32	912.866	680.092
	2182.26	932.679	670.957
	2181.2	880.608	657.252
	2180.14	885.934	687.483
	2179.08	895.919	690.619
	2178.02	840.913	707.42
	2176.96	890.638	648.963
	2175.9	842.096	742.127
	2174.84	836.87	675.858
	2173.78	896.9	693.432
	2172.72	904.972	635.779
	2171.66	898.875	648.135
	2170.6	896.408	662.356
	2169.54	901.789	688.765
	2168.48	877.223	720.199
	2167.42	881.475	698.506
	2166.36	827.428	680.228
	2165.3	861.271	689.005
	2164.24	889.511	685.744
	2163.18	835.65	705.462
	2162.12	875.957	681.999
	2161.06	877.381	641.011
	2160	891.413	681.394
	2158.94	846.771	723.227
	2157.88	804.662	699.646
	2156.83	841.891	691.004
	2155.77	829.29	667.833
	2154.71	842.919	666.873
	2153.65	858.248	692.803
	2152.59	822.557	679.777
	2151.53	809.702	694.872
	2150.47	853.817	716.307
	2149.41	867.131	689.073
	2148.35	875.472	657.99
	2147.29	874.008	693.365
	2146.23	892.885	684.709
	2145.17	851.134	675.365
	2144.11	848.113	660.889
	2143.05	830.566	680.838
	2141.99	862.581	680.464
	2140.93	854.381	674.006
	2139.87	865.352	669.747
	2138.81	880.151	684.366
	2137.75	823.043	681.561
	2136.69	787.005	679.715
	2135.63	791.624	667.554
	2134.57	840.481	716.735
	2133.51	858.679	680.345
	2132.45	854.558	672.516
	2131.39	882.241	720.404
	2130.33	846.567	690.236
	2129.27	902.39	665.378
	2128.21	849.555	661.117
	2127.15	838.545	635.292
	2126.09	875.411	676.957
	2125.04	860.562	635.904
	2123.98	884.678	672.497
	2122.92	827.884	680.362
	2121.86	864.802	668.872
	2120.8	874.394	662.827
	2119.74	853.581	673.858
	2118.68	863.099	690.487
	2117.62	883.869	635.236
	2116.56	895.246	655.3
	2115.5	858.679	670.186
	2114.44	867.868	687.487
	2113.38	846.632	700.364
	2112.32	926.364	638.101
	2111.26	858.661	613.936
	2110.2	824.218	679.892
	2109.14	820.873	653.958
	2108.08	864.824	677.041
	2107.02	859.344	661.714
	2105.96	845.164	651.655
	2104.9	879.209	674.285
	2103.84	861.5	672.997
	2102.78	825.824	667.581
	2101.72	826.692	654.464
	2100.66	866.923	665.904
	2099.6	898.876	654.594
	2098.54	830.304	686.711
	2097.48	867.578	678.136
	2096.42	820.934	707.164
	2095.36	857.309	671.359
	2094.3	790.722	689.415
	2093.25	862.857	639.037
	2092.19	886.64	655.25
	2091.13	841.177	643.846
	2090.07	859.013	667.707
	2089.01	871.137	627.211
	2087.95	869.599	651.693
	2086.89	865.235	689.445
	2085.83	858.196	674.024
	2084.77	851.118	670.989
	2083.71	871.277	665.76
	2082.65	885.16	669.947
	2081.59	877.897	678.717
	2080.53	838.258	691.085
	2079.47	828.356	653.892
	2078.41	841.67	702.78
	2077.35	804.911	720.571
	2076.29	852.297	634.523
	2075.23	820.16	680.255
	2074.17	881.432	661.432
	2073.11	824.181	612.559
	2072.05	849.08	643.775
	2070.99	855.402	685.933
	2069.93	848.225	695.113
	2068.87	868.12	722.13
	2067.81	844.313	710.924
	2066.75	850.998	707.187
	2065.69	847.682	702.805
	2064.63	879.92	672.715
	2063.57	888.052	660.487
	2062.51	847.946	705.063
	2061.45	841.098	712.959
	2060.4	817.287	665.722
	2059.34	800.003	656.419
	2058.28	762.458	643.378
	2057.22	842.32	644.026
	2056.16	807.721	683.482
	2055.1	844.191	644.955
	2054.04	836.467	614.314
	2052.98	837.154	618.928
	2051.92	867.835	639.377
	2050.86	853.504	674.59
	2049.8	815.71	695.046
	2048.74	811.549	665.558
	2047.68	826.244	672.504
	2046.62	816.35	658.09
	2045.56	815.789	655.172
	2044.5	845.708	647.184
	2043.44	831.404	678.623
	2042.38	810.772	678.895
	2041.32	840.163	668.726
	2040.26	791.707	677.169
	2039.2	834.321	637.44
	2038.14	858.302	638.716
	2037.08	865.43	620.601
	2036.02	826.072	672.901
	2034.96	845.187	641.051
	2033.9	895.494	732.587
	2032.84	807.687	689.167
	2031.78	880.104	650.747
	2030.72	829.662	602.662
	2029.66	851.231	638.341
	2028.61	847.365	639.816
	2027.55	840.723	674.341
	2026.49	802.568	647.365
	2025.43	836.691	655.278
	2024.37	814.736	607.352
	2023.31	837.191	607.048
	2022.25	874.877	669.268
	2021.19	870.339	693.436
	2020.13	835.635	685.873
	2019.07	794.511	652.948
	2018.01	818.005	638.004
	2016.95	826.648	666.41
	2015.89	830.525	634.76
	2014.83	848.98	656.355
	2013.77	804.14	651.929
	2012.71	825.923	655.264
	2011.65	832.811	687.5
	2010.59	872.724	669.27
	2009.53	862.262	699.866
	2008.47	843.449	623.76
	2007.41	806.698	687.159
	2006.35	824.723	648.404
	2005.29	836.49	627.134
	2004.23	809.81	696.967
	2003.17	828.238	664.843
	2002.11	850.017	611.319
	2001.05	820.709	650.325
	1999.99	784.201	644.706
	1998.93	781.459	675.521
	1997.87	809.754	682.307
	1996.82	807.202	682.741
	1995.76	794.019	666.846
	1994.7	821.58	649.595
	1993.64	821.386	653.685
	1992.58	857.22	701.726
	1991.52	840.84	693.911
	1990.46	810.75	642.25
	1989.4	789.563	652.567
	1988.34	781.159	674.002
	1987.28	822.244	620.01
	1986.22	775.506	662.819
	1985.16	802.409	720.331
	1984.1	797.884	611.056
	1983.04	834.568	592.01
	1981.98	777.497	620.738
	1980.92	849.207	636.942
	1979.86	813.486	681.682
	1978.8	841.736	651.87
	1977.74	818.967	682.789
	1976.68	862.146	631.72
	1975.62	819.532	641.199
	1974.56	779.001	653.377
	1973.5	764.806	673.6
	1972.44	829.525	660.571
	1971.38	870.502	626.809
	1970.32	828.825	628.217
	1969.26	791.856	639.222
	1968.2	775.898	649.738
	1967.14	807.753	695.145
	1966.08	819.444	682.826
	1965.03	819.951	643.993
	1963.97	847.235	635.526
	1962.91	814.418	658.666
	1961.85	797.81	641.725
	1960.79	817.6	613.493
	1959.73	777.038	639.691
	1958.67	785.826	650.547
	1957.61	784.55	629.145
	1956.55	784.969	669.78
	1955.49	763.456	656.818
	1954.43	796.707	641.348
	1953.37	819.922	652.635
	1952.31	794.769	631.51
	1951.25	829.678	620.31
	1950.19	891.123	619.768
	1949.13	790.047	624.469
	1948.07	808.767	621.851
	1947.01	845.758	615.529
	1945.95	767.472	573.438
	1944.89	810.222	617.085
	1943.83	818.196	623.419
	1942.77	805.851	644.718
	1941.71	812.686	642.826
	1940.65	832.248	658.131
	1939.59	820.904	671.542
	1938.53	816.879	648.878
	1937.47	793.78	649.082
	1936.41	794.436	642.432
	1935.35	783.24	650.867
	1934.29	774.768	647.499
	1933.23	779.673	638.936
	1932.18	803.061	624.197
	1931.12	795.628	621.415
	1930.06	815.219	652.479
	1929	811.524	660.109
	1927.94	793.973	661.498
	1926.88	769.146	616.466
	1925.82	769.608	613.66
	1924.76	790.897	665.635
	1923.7	829.508	627.181
	1922.64	857.707	607.339
	1921.58	796.344	630.514
	1920.52	798.595	672.914
	1919.46	848.75	657.744
	1918.4	808.048	619.107
	1917.34	818.964	611.335
	1916.28	780.636	650.29
	1915.22	779.28	621.075
	1914.16	840.801	626.671
	1913.1	774.015	614.417
	1912.04	804.148	620.015
	1910.98	773.453	643.659
	1909.92	767.432	606.04
	1908.86	758.647	627.691
	1907.8	835.637	656.138
	1906.74	795.627	655.309
	1905.68	750.993	643.836
	1904.62	737.544	644.699
	1903.56	758.379	655.624
	1902.5	770.55	664.676
	1901.44	782.716	626.517
	1900.39	780.328	653.417
	1899.33	739.493	616.725
	1898.27	800.048	629.463
	1897.21	831.877	649.498
	1896.15	779.516	661.482
	1895.09	788.848	627.988
	1894.03	785.441	632.18
	1892.97	770.616	617.446
	1891.91	795.969	643.834
	1890.85	798.034	643.934
	1889.79	796.066	620.663
	1888.73	760.16	573.521
	1887.67	765.376	616.151
	1886.61	784.825	674.222
	1885.55	778.625	660.777
	1884.49	785.802	664.129
	1883.43	797.398	671.347
	1882.37	811.651	671.075
	1881.31	809.467	652.04
	1880.25	807.822	666.443
	1879.19	789.672	675.134
	1878.13	764.933	630.858
	1877.07	779.37	666.523
	1876.01	785.313	659.007
	1874.95	781.2	644.533
	1873.89	796.594	634.953
	1872.83	760.457	609.633
	1871.77	751.465	657.695
	1870.71	769.119	654.349
	1869.65	760.174	650.766
	1868.6	798.585	643.47
	1867.54	758.698	641.32
	1866.48	787.584	616.17
	1865.42	768.545	673.407
	1864.36	770.269	646.203
	1863.3	786.629	665.228
	1862.24	750.312	636.992
	1861.18	727.674	669.287
	1860.12	785.88	683.073
	1859.06	773.662	657.116
	1858	805.644	646.507
	1856.94	744.402	607.146
	1855.88	783.755	630.451
	1854.82	782.081	639.9
	1853.76	799.129	658.152
	1852.7	746.281	677.374
	1851.64	767.922	664.668
	1850.58	743.572	670.821
	1849.52	730.875	628.853
	1848.46	808.588	665.705
	1847.4	782.88	642.31
	1846.34	787.003	717.349
	1845.28	756.328	658.693
	1844.22	759.408	664.67
	1843.16	840.928	644.119
	1842.1	776.247	692.925
	1841.04	794.316	674.945
	1839.98	769.253	642.942
	1838.92	791.639	611.584
	1837.86	818.009	653.61
	1836.8	799.173	673.73
	1835.75	766.522	615.554
	1834.69	748.169	638.155
	1833.63	765.378	625.06
	1832.57	762.311	657.384
	1831.51	787.379	708.462
	1830.45	754.812	672.725
	1829.39	738.586	640.245
	1828.33	773.333	622.819
	1827.27	803.562	637.647
	1826.21	797.002	641.192
	1825.15	804.686	725.865
	1824.09	753.022	682.598
	1823.03	756.763	649.341
	1821.97	779.709	640.827
	1820.91	773.68	611.395
	1819.85	732.499	637.487
	1818.79	751.69	654.927
	1817.73	748.818	645.508
	1816.67	783.623	686.082
	1815.61	762.843	684.061
	1814.55	751.212	672.241
	1813.49	716.271	658.824
	1812.43	796.867	661.574
	1811.37	761.077	654.396
	1810.31	777.804	701.815
	1809.25	788.308	726.254
	1808.19	809.469	670.026
	1807.13	782.772	656.885
	1806.07	739.46	668.228
	1805.01	748.683	651.613
	1803.96	764.097	639.45
	1802.9	748.749	693.024
	1801.84	782.982	689.228
	1800.78	774.18	647.969
	1799.72	778.869	635.294
	1798.66	802.034	683.203
	1797.6	777.755	713.524
	1796.54	777.255	739.907
	1795.48	762.425	698.17
	1794.42	751.436	671.973
	1793.36	743.162	663.227
	1792.3	772.308	667.589
	1791.24	773.545	651.79
	1790.18	785.547	687.989
	1789.12	811.893	700.577
	1788.06	769.504	650.214
	1787	714.578	673.846
	1785.94	751.291	675.406
	1784.88	757.634	712.128
	1783.82	780.362	694.232
	1782.76	812.961	685.197
	1781.7	760.913	719.667
	1780.64	749.673	712.693
	1779.58	781.845	691.115
	1778.52	737.282	694.955
	1777.46	750.979	704.512
	1776.4	762.644	663.661
	1775.34	749.777	669.853
	1774.28	761.766	674.867
	1773.22	750.082	710.87
	1772.17	766.795	744.174
	1771.11	768.526	741.57
	1770.05	799.491	708.093
	1768.99	810.482	704.416
	1767.93	783.867	696.962
	1766.87	763.84	708.483
	1765.81	782.508	705.726
	1764.75	767.043	686.877
	1763.69	784.943	688.529
	1762.63	786.225	707.871
	1761.57	785.131	705.38
	1760.51	828.63	706.123
	1759.45	793.627	717.12
	1758.39	789.151	743.195
	1757.33	778.195	715.756
	1756.27	792.235	718.843
	1755.21	789.945	714.4
	1754.15	765.994	705.197
	1753.09	764.379	696.248
	1752.03	783.356	680.975
	1750.97	780.876	702.751
	1749.91	777.078	695.973
	1748.85	769.932	712.73
	1747.79	761.529	755.945
	1746.73	755.928	693.582
	1745.67	770.46	700.79
	1744.61	784.776	725
	1743.55	776.432	723.623
	1742.49	778.059	729.72
	1741.43	787.715	712.143
	1740.37	820.998	738.763
	1739.32	824.475	796.039
	1738.26	826.302	767.03
	1737.2	832.111	772.881
	1736.14	819.518	716.613
	1735.08	785.855	744.883
	1734.02	758.694	745.078
	1732.96	749.714	771.476
	1731.9	803.443	735.368
	1730.84	814.444	796.275
	1729.78	785.431	780.394
	1728.72	824.982	798.22
	1727.66	823.4	764.414
	1726.6	824.578	792.266
	1725.54	806.839	760.862
	1724.48	832.16	791.069
	1723.42	833.342	782.908
	1722.36	802.643	787.753
	1721.3	791.018	796.379
	1720.24	753.479	798.543
	1719.18	782.9	803.093
	1718.12	803.547	853.867
	1717.06	824.838	847.425
	1716	872.138	865.23
	1714.94	846.434	846.544
	1713.88	772.523	809.511
	1712.82	865.369	866.133
	1711.76	837.844	810.776
	1710.7	836.711	848.778
	1709.64	821.185	854.931
	1708.58	863.465	915.761
	1707.53	851.576	845.325
	1706.47	820.55	880.597
	1705.41	823.546	866.148
	1704.35	818.014	882.132
	1703.29	796.884	878.478
	1702.23	793.592	909.074
	1701.17	818.79	857.907
	1700.11	848.473	877.49
	1699.05	857.395	885.75
	1697.99	878.47	902.677
	1696.93	827.296	923.125
	1695.87	827.352	941.805
	1694.81	837.326	905.798
	1693.75	890.224	887.221
	1692.69	886.681	999.101
	1691.63	899.393	975.826
	1690.57	855.221	942.794
	1689.51	854.829	973.372
	1688.45	876.693	958.481
	1687.39	910.414	937.966
	1686.33	905.684	967.259
	1685.27	921.667	1028.64
	1684.21	927.208	968.857
	1683.15	922.562	945.364
	1682.09	927.934	995.066
	1681.03	894.614	1000.71
	1679.97	863.508	1023.99
	1678.91	868.134	1047.57
	1677.85	871.407	1028.05
	1676.79	887.465	1055.3
	1675.74	897.592	1117.2
	1674.68	910.971	1120.11
	1673.62	951.582	1106.35
	1672.56	949.775	1101.67
	1671.5	933.783	1091.39
	1670.44	920	1122.26
	1669.38	922.466	1129.93
	1668.32	967.501	1122.11
	1667.26	952.185	1123.3
	1666.2	979.228	1146.64
	1665.14	1000.76	1201.45
	1664.08	1006.81	1218.77
	1663.02	1008.06	1226.83
	1661.96	1002.57	1181.48
	1660.9	1011.85	1207.42
	1659.84	1027.45	1234.41
	1658.78	1060.52	1239.03
	1657.72	1059.83	1248.07
	1656.66	1045.6	1277.4
	1655.6	1080.77	1328.98
	1654.54	1031.41	1376.13
	1653.48	1065.23	1384.92
	1652.42	1038.78	1393.56
	1651.36	1083.68	1391.05
	1650.3	1032.76	1359.57
	1649.24	1161.34	1393.04
	1648.18	1103.08	1428.85
	1647.12	1055.88	1495.61
	1646.06	1085.22	1452.29
	1645	1064.41	1442.83
	1643.95	1111.3	1510.91
	1642.89	1144	1561.92
	1641.83	1179.74	1597.6
	1640.77	1170.74	1537.06
	1639.71	1154.8	1545.14
	1638.65	1168.78	1583.66
	1637.59	1147.69	1618.4
	1636.53	1193.48	1660.88
	1635.47	1212.2	1685.8
	1634.41	1209.43	1712.95
	1633.35	1207.89	1705.56
	1632.29	1207.35	1770.68
	1631.23	1249.49	1814.89
	1630.17	1226.59	1847.38
	1629.11	1231.5	1873.72
	1628.05	1283.51	1881.83
	1626.99	1263.74	1932.17
	1625.93	1266.42	1938.36
	1624.87	1270.98	1945.8
	1623.81	1263.41	1993.3
	1622.75	1263.14	2027.93
	1621.69	1271.83	2048.62
	1620.63	1268.3	2034.06
	1619.57	1258.1	2061.52
	1618.51	1326.52	2160.69
	1617.45	1373.43	2180.46
	1616.39	1340.98	2266.75
	1615.33	1344.87	2261.05
	1614.27	1387.36	2338.23
	1613.21	1388.25	2287.83
	1612.15	1324.72	2421.7
	1611.1	1440.23	2419.33
	1610.04	1384.39	2441.11
	1608.98	1433.3	2515.25
	1607.92	1420.72	2478.29
	1606.86	1474.49	2519.53
	1605.8	1451.09	2591.67
	1604.74	1449.99	2557.86
	1603.68	1444.96	2513.69
	1602.62	1441.58	2596.67
	1601.56	1459.46	2633.35
	1600.5	1504.76	2598.96
	1599.44	1528.07	2567.76
	1598.38	1552.24	2649.17
	1597.32	1520.77	2654.28
	1596.26	1498.33	2686.53
	1595.2	1469.2	2706.09
	1594.14	1486.5	2727.72
	1593.08	1532.18	2721.7
	1592.02	1533.63	2701.23
	1590.96	1517.45	2732.77
	1589.9	1524.7	2743.3
	1588.84	1531.61	2741.5
	1587.78	1489.04	2741.33
	1586.72	1518.02	2783.61
	1585.66	1564.4	2781.04
	1584.6	1510.31	2695.05
	1583.54	1495.16	2720.17
	1582.48	1551.83	2782.53
	1581.42	1562.54	2720.66
	1580.36	1569.28	2803.8
	1579.31	1538.55	2721.84
	1578.25	1515.68	2678.75
	1577.19	1554.97	2774.98
	1576.13	1550.77	2764.66
	1575.07	1539.81	2771.98
	1574.01	1546.65	2802.39
	1572.95	1522.34	2674.63
	1571.89	1512.01	2619.16
	1570.83	1547.57	2671.53
	1569.77	1566.35	2585.53
	1568.71	1527.37	2617.95
	1567.65	1527.84	2678.26
	1566.59	1533.74	2601.73
	1565.53	1545.31	2636.96
	1564.47	1533.93	2643.91
	1563.41	1525.87	2556.27
	1562.35	1501.34	2544.12
	1561.29	1491.39	2572.26
	1560.23	1528.72	2600.55
	1559.17	1537.47	2546.66
	1558.11	1522.23	2415.74
	1557.05	1493.05	2475.2
	1555.99	1482.17	2452.7
	1554.93	1497.4	2501.71
	1553.87	1537.04	2440.65
	1552.81	1497.54	2427.7
	1551.75	1529.21	2411.92
	1550.69	1518.47	2442.1
	1549.63	1514.69	2350.44
	1548.57	1544.87	2358.7
	1547.52	1519.42	2351.99
	1546.46	1503.28	2336.83
	1545.4	1472.16	2338.8
	1544.34	1485.89	2333.39
	1543.28	1466.55	2271.45
	1542.22	1478.39	2343.44
	1541.16	1486.12	2350.09
	1540.1	1501.47	2299.14
	1539.04	1500.45	2270.98
	1537.98	1492.39	2253.18
	1536.92	1442.84	2234.73
	1535.86	1440.99	2263.98
	1534.8	1457.04	2267.35
	1533.74	1422.78	2236.38
	1532.68	1431.21	2262.28
	1531.62	1474.95	2254.52
	1530.56	1496.33	2196.53
	1529.5	1458.76	2171.63
	1528.44	1427.89	2120.98
	1527.38	1444.09	2182.3
	1526.32	1417.24	2141.4
	1525.26	1431.14	2057.41
	1524.2	1406.53	2198.24
	1523.14	1438.59	2137.5
	1522.08	1438.97	2146.47
	1521.02	1416.55	2134.69
	1519.96	1430.85	2165.36
	1518.9	1482.56	2165.34
	1517.84	1451.49	2107.18
	1516.78	1466.58	2127.45
	1515.72	1447.76	2113.88
	1514.67	1419.93	2144.32
	1513.61	1449.82	2098.06
	1512.55	1423.09	2092.49
	1511.49	1398.54	2119.91
	1510.43	1408.63	2128.32
	1509.37	1390.74	2115.46
	1508.31	1403.06	2042.65
	1507.25	1427.58	2033.18
	1506.19	1406.83	2034.15
	1505.13	1333.3	2005.19
	1504.07	1325.44	1983.06
	1503.01	1379.5	1973.97
	1501.95	1387.85	1995.75
	1500.89	1342.17	2027
	1499.83	1373.99	2035.18
	1498.77	1351.83	2001.83
	1497.71	1359.54	2063.66
	1496.65	1316.06	2035.27
	1495.59	1348.56	1990.4
	1494.53	1320.83	2055.05
	1493.47	1304.53	1990.71
	1492.41	1409.98	1964.52
	1491.35	1429.66	2022.5
	1490.29	1410.31	2006.31
	1489.23	1355.32	1953.41
	1488.17	1307.37	2016.93
	1487.11	1337.18	2077.02
	1486.05	1329.66	2017
	1484.99	1311.12	1999.38
	1483.93	1345.78	1977.13
	1482.88	1391.87	1970.04
	1481.82	1341.76	1967.5
	1480.76	1313.2	2047.42
	1479.7	1301.19	2031.2
	1478.64	1317.93	1986.23
	1477.58	1372.04	1945.44
	1476.52	1338.71	2040.07
	1475.46	1323.98	2036.89
	1474.4	1373.58	1989.8
	1473.34	1340.28	1888.1
	1472.28	1352.62	1939.94
	1471.22	1345.95	1982.66
	1470.16	1308.04	2006.19
	1469.1	1304.06	1982.2
	1468.04	1310.9	1942.34
	1466.98	1294.04	1953.11
	1465.92	1284.94	2000.99
	1464.86	1305.03	2045.86
	1463.8	1330.71	1992.14
	1462.74	1307.21	1961.32
	1461.68	1323.25	1993.24
	1460.62	1326.9	1968.82
	1459.56	1369.67	1982.21
	1458.5	1287.05	2036.74
	1457.44	1274.13	1956.36
	1456.38	1353.51	1982.96
	1455.32	1271.17	2033.07
	1454.26	1283.09	1971.59
	1453.2	1292.96	2026.27
	1452.14	1270.7	2064.84
	1451.09	1312.91	2012.33
	1450.03	1322.32	2033.98
	1448.97	1290.51	2036.99
	1447.91	1277.92	2008.38
	1446.85	1287.64	2048.12
	1445.79	1308.38	2053.55
	1444.73	1268.31	2060.96
	1443.67	1249.03	2015.63
	1442.61	1290.87	1992.97
	1441.55	1341.38	2027.88
	1440.49	1320.37	2057.15
	1439.43	1313.83	1966.74
	1438.37	1299.32	1992.09
	1437.31	1310.55	2049.22
	1436.25	1283.32	1998.48
	1435.19	1290.82	2051.57
	1434.13	1308.52	2113.66
	1433.07	1302.19	2109.77
	1432.01	1283.15	2054.18
	1430.95	1289.97	2039.92
	1429.89	1308.74	2053.68
	1428.83	1313.47	2044.71
	1427.77	1298.42	2056.65
	1426.71	1266.03	2068.5
	1425.65	1299.62	2032.68
	1424.59	1300.34	2002.47
	1423.53	1294.13	2009.2
	1422.47	1291.62	2027.74
	1421.41	1249.79	2089.73
	1420.35	1284.12	2034.55
	1419.29	1252.52	2011.76
	1418.24	1266.17	2021.63
	1417.18	1314.55	2033.24
	1416.12	1323.93	2065.76
	1415.06	1303.61	2108.94
	1414	1340.65	2096.68
	1412.94	1349.2	2040.18
	1411.88	1298.33	2049.14
	1410.82	1283.42	2107.4
	1409.76	1263.27	2103.92
	1408.7	1261.1	2128.55
	1407.64	1297.23	2107.73
	1406.58	1320.85	2090.12
	1405.52	1257.47	2090.32
	1404.46	1327.48	2166.36
	1403.4	1282.95	2116.23
	1402.34	1261.67	2147.98
	1401.28	1246.56	2199.62
	1400.22	1269.73	2137.79
	1399.16	1280.58	2132.93
	1398.1	1300.35	2149.65
	1397.04	1278.87	2179.64
	1395.98	1262.76	2200.54
	1394.92	1291.81	2184.12
	1393.86	1278.23	2156.29
	1392.8	1247.15	2109.33
	1391.74	1219.54	2155.88
	1390.68	1238.88	2130.39
	1389.62	1264.78	2172.45
	1388.56	1211.07	2192.59
	1387.5	1244.29	2153.5
	1386.45	1301.13	2155.82
	1385.39	1242.95	2158.58
	1384.33	1195.24	2207.67
	1383.27	1182.25	2230.04
	1382.21	1189.84	2186.03
	1381.15	1236.47	2138.9
	1380.09	1281.23	2111.29
	1379.03	1247.73	2141.45
	1377.97	1188.84	2221.08
	1376.91	1220.53	2181.73
	1375.85	1234.86	2169.21
	1374.79	1212.31	2275.77
	1373.73	1234.16	2176.07
	1372.67	1225.74	2149.09
	1371.61	1265.33	2198.9
	1370.55	1262.05	2175.92
	1369.49	1191.99	2173
	1368.43	1206.62	2222.45
	1367.37	1188.45	2241.08
	1366.31	1195.69	2207.25
	1365.25	1223.78	2179.64
	1364.19	1206.87	2196.84
	1363.13	1212.37	2247.38
	1362.07	1252.74	2273.45
	1361.01	1191.78	2210.26
	1359.95	1242.16	2253.07
	1358.89	1222.78	2182.79
	1357.83	1244.88	2229.07
	1356.77	1170.37	2316
	1355.71	1179.65	2247.01
	1354.66	1193.67	2216.59
	1353.6	1186.69	2229.61
	1352.54	1200.78	2192.58
	1351.48	1208.23	2220.02
	1350.42	1222.23	2249.88
	1349.36	1216.03	2219.97
	1348.3	1176.25	2215.65
	1347.24	1197.58	2206.93
	1346.18	1186.1	2206.08
	1345.12	1198.07	2132.77
	1344.06	1079.31	2190.82
	1343	1157.95	2206.56
	1341.94	1146.91	2205.49
	1340.88	1160.87	2208.15
	1339.82	1159.29	2245.62
	1338.76	1167.48	2263.35
	1337.7	1184.6	2223.4
	1336.64	1178.49	2182.6
	1335.58	1188.7	2195.3
	1334.52	1199.7	2194
	1333.46	1142.26	2134.7
	1332.4	1137.44	2165.83
	1331.34	1116.32	2210.63
	1330.28	1123.74	2178.96
	1329.22	1195.88	2104.15
	1328.16	1190.46	2129.63
	1327.1	1161.2	2168.26
	1326.04	1127.28	2162.86
	1324.98	1151.21	2123.54
	1323.92	1137.81	2167.51
	1322.86	1133.71	2236.81
	1321.81	1148.39	2197.22
	1320.75	1135.2	2129.92
	1319.69	1139.27	2164.07
	1318.63	1155.43	2117.21
	1317.57	1167.76	2075.57
	1316.51	1130.42	2097.2
	1315.45	1170.22	2120.8
	1314.39	1130.39	2114.74
	1313.33	1104.29	2128.13
	1312.27	1095.64	2055.46
	1311.21	1103.4	2114.21
	1310.15	1132.21	2130.86
	1309.09	1121.76	2105.78
	1308.03	1092.83	2096.96
	1306.97	1109.39	2074.91
	1305.91	1111.8	2106.16
	1304.85	1093.89	2074.4
	1303.79	1100.79	2070.63
	1302.73	1092.61	2078.18
	1301.67	1053.75	2007.08
	1300.61	1076.45	2056.73
	1299.55	1068.92	2064.45
	1298.49	1086.89	2047.75
	1297.43	1082.98	2050.44
	1296.37	1067.31	1978.4
	1295.31	1087.76	1925.94
	1294.25	1099.58	1991.45
	1293.19	1077.08	1995.24
	1292.13	1156.74	1952.32
	1291.07	1025.56	2035.02
	1290.02	1033.28	2002.9
	1288.96	1039.06	1970.8
	1287.9	1055.29	1924.71
	1286.84	1069.74	1969.26
	1285.78	1052.92	1913.53
	1284.72	1021.85	1904.12
	1283.66	1019.54	1919.36
	1282.6	1057.52	1873.06
	1281.54	1076.2	1842.44
	1280.48	1038.88	1885.06
	1279.42	1062.08	1854.81
	1278.36	1092.05	1890.64
	1277.3	1058.34	1864.65
	1276.24	1007.63	1799.04
	1275.18	1013.95	1796.23
	1274.12	1026.47	1833.97
	1273.06	1018.21	1849.06
	1272	996.877	1827.07
	1270.94	1031.04	1796.92
	1269.88	1041.01	1768.07
	1268.82	961.513	1735.87
	1267.76	988.557	1723.68
	1266.7	994.639	1723.92
	1265.64	1039.4	1764.43
	1264.58	1035.27	1703.25
	1263.52	952.879	1752.36
	1262.46	940.309	1688.89
	1261.4	973.972	1676.12
	1260.34	1015.19	1649.5
	1259.28	1007.44	1634.95
	1258.23	968.685	1665.53
	1257.17	962.763	1679.1
	1256.11	981.602	1644.07
	1255.05	971.624	1646.49
	1253.99	961.705	1705.42
	1252.93	953.691	1648.4
	1251.87	972.869	1622.29
	1250.81	974.728	1685.92
	1249.75	955.498	1619.48
	1248.69	929.96	1592.79
	1247.63	917.841	1617.57
	1246.57	932.695	1637.83
	1245.51	945.163	1623.05
	1244.45	920.748	1562.08
	1243.39	926.647	1570.57
	1242.33	933.729	1520.41
	1241.27	921.877	1496.78
	1240.21	904.621	1543.2
	1239.15	910.927	1534.59
	1238.09	916.79	1507.31
	1237.03	919.282	1529.53
	1235.97	918.027	1534.47
	1234.91	914.759	1524.65
	1233.85	910.225	1535.2
	1232.79	903.548	1501.46
	1231.73	907.583	1501.9
	1230.67	897.698	1491.89
